# Supplementary material for: Pathogenic mutations in the chromokinesin KIF22 disrupt anaphase chromosome segregation
Source: eLife journal article supplement (doi:10.7554/elife.78653), 2022-06-22
Supplement: supp [file F2 FRAP.xlsx]

## Sheet: Sheet1
KIF22-GFP Interphase
Time (Seconds)	Bleached						Unbleached
-35	1	1	1	1	1	1	1	1	1	1	1	1
-30	1.01367	1.03479	0.996645	0.973006	0.983631	0.995052	0.998285	1.00757	1.0132	0.977071	0.983105	0.989269
-25	1.01394	0.999948	0.9979	0.939039	0.959692	0.996844	1.0087	1.00185	1.00431	1.01173	0.993891	0.987364
-20	1.0098	1.01057	1.02025	0.940365	0.97155	0.981237	1.01545	0.991804	1.0072	1.001	0.992977	0.976792
-15	0.998677	1.00431	1.02496	0.954485	0.96501	0.983597	1.03672	1.01133	1.02103	1.00463	1.00134	0.978316
0	0.277104	0.179265	0.155491	0.375855	0.361295	0.254317	0.966337	0.921193	0.952508	0.94189	0.979064	0.927916
20	0.487362	0.382492	0.413993	0.609296	0.581761	0.44478	1.03982	0.976275	1.0284	1.02151	1.04848	1.01609
40	0.658716	0.541442	0.640709	0.740606	0.704275	0.598497	1.03454	0.939432	1.04931	1.00815	1.052	1.00711
60	0.756029	0.63855	0.739348	0.79266	0.772517	0.688704	1.00674	0.932129	1.01168	1.02135	1.0358	0.995975
80	0.831348	0.69273	0.757142	0.830756	0.809351	0.73959	0.932328	0.887307	1.04295	1.02351	1.02132	0.994808
100	0.869503	0.716338	0.8295	0.855657	0.836956	0.784912	0.880102	0.876309	1.00952	1.03077	1.03432	1.00762
120	0.902103	0.76271	0.849084	0.843892	0.868579	0.819415	0.844271	0.8468	0.995191	1.04912	1.01988	0.999166
140	0.920811	0.77096	0.906505	0.874727	0.865183	0.845881	0.797136	0.829485	0.943054	1.0121	0.999262	0.978149
160	0.967985	0.795434	0.940081	0.885555	0.896806	0.886082	0.786976	0.812225	0.928143	1.01946	0.993818	0.988696
180	1.01505	0.844547	0.958472	0.922769	0.914582	0.900844	0.754305	0.814042	0.888584	1.02892	0.971756	0.989284
200	1.01882	0.886358	0.99498	0.933048	0.917425	0.941847	0.742375	0.781377	0.854023	0.985954	0.96431	0.990062
220	1.05416	0.906278	1.03286	0.929972	0.924741	0.946747	0.733142	0.778544	0.848754	1.01367	0.964661	0.991102
KIF22-GFP Metaphase
Time (Seconds)	Bleached						Unbleached
-35	1	1	1	1	1	1	1	1	1	1	1	1
-30	0.998886	0.947171	0.999368	1.03873	1.06591	0.998589	0.898076	0.928031	1.01228	0.900131	1.00256	0.994252
-25	0.984805	0.940898	1.02432	1.02373	1.03695	0.982733	0.904144	0.93576	1.00404	0.986449	1.00734	0.985846
-20	0.795082	0.926404	1.01585	1.00815	0.947448	0.988382	0.973058	1.02583	0.995024	1.07345	0.977477	0.993744
-15	0.817236	0.886827	1.00903	1.00687	0.74766	0.967744	0.975766	1.07894	0.965577	0.966514	0.994724	0.99709
0	0.131567	0.165936	0.116022	0.144087	0.301464	0.219457	0.848325	0.891617	0.76011	0.816656	0.890125	0.846583
20	0.136609	0.177892	0.140497	0.166757	0.324228	0.231657	0.935356	0.951699	0.836102	0.861132	0.923626	0.90367
40	0.138282	0.199819	0.149987	0.172435	0.312161	0.233391	0.911271	0.948829	0.928396	0.910959	0.926028	0.89357
60	0.134727	0.18106	0.158422	0.180792	0.321802	0.230987	0.897046	0.944766	0.847685	0.900244	0.95692	0.845676
80	0.133231	0.210785	0.15407	0.187597	0.357782	0.242532	0.891298	0.949705	0.940185	0.907296	0.953944	0.875073
100	0.130762	0.211048	0.165434	0.189185	0.371143	0.248204	0.942429	1.02843	0.957294	0.882497	0.998605	0.803406
120	0.133732	0.237206	0.171445	0.194323	0.363377	0.247284	0.976673	1.06538	1.00441	0.843612	0.943116	0.84623
140	0.14265	0.252919	0.181087	0.198933	0.39811	0.247905	1.00238	1.10153	1.03007	0.857808	0.838322	0.780238
160	0.1504	0.255847	0.184723	0.210831	0.385807	0.257264	0.968304	1.09941	0.982265	0.834394	0.924107	0.837208
180	0.150863	0.271761	0.171051	0.203933	0.394167	0.249011	0.938648	1.12326	0.966917	0.809455	0.979307	0.829645
200	0.152649	0.295455	0.16057	0.21029	0.37485	0.252456	1.01113	1.14147	0.935209	0.721776	0.991427	0.790123
220	0.153557	0.292908	0.174722	0.215474	0.386356	0.262154	0.973234	1.16375	0.92869	0.733616	0.958134	0.8851
KIF22-GFP Anaphase
Time (Seconds)	Bleached								Unbleached
-35	1	1	1	1	1	1	1	1	1	1	1	1	1	1	1	1
-30	0.98729	0.988566	0.994983	1.00315	1.00406	0.966041	0.999715	0.997231	1.04025	0.99404	1.03933	0.960303	0.962635	0.972497	1.05157	0.993006
-25	1.01195	1.00952	1.02034	1.00291	1.0139	0.979861	1.04138	1.04873	1.04872	0.981548	1.06673	1.01899	0.948976	0.968382	1.07902	1.01562
-20	1.00902	1.02726	0.989104	1.0007	0.998227	0.985977	1.04119	1.03621	1.06785	1.00463	1.07793	1.07627	0.942107	0.935979	1.1157	0.991296
-15	1.02256	1.03826	1.01838	1.01864	1.00964	0.984015	1.07412	0.95853	1.06338	1.0209	1.06593	1.06708	0.908109	0.953839	1.08483	1.02586
0	0.098869	0.134951	0.24525	0.14748	0.232116	0.183791	0.142731	0.198876	0.962482	0.995504	1.00691	1.06349	0.852156	0.890645	1.01979	0.97448
20	0.112043	0.183811	0.367238	0.246177	0.317752	0.226065	0.168486	0.22129	1.06483	1.10882	1.08565	1.20424	0.958109	0.947805	1.07663	1.0994
40	0.119908	0.205931	0.373117	0.292665	0.335127	0.235731	0.214592	0.249672	1.05455	1.1299	1.07691	1.23483	0.923653	0.976955	1.17737	1.06303
60	0.126166	0.227255	0.404294	0.353624	0.358599	0.244011	0.228575	0.265277	1.08668	1.14698	1.01755	1.21123	0.877937	0.901786	1.20175	1.09863
80	0.137415	0.23467	0.43458	0.398585	0.38503	0.248882	0.235335	0.296234	1.11373	1.16577	0.964406	1.22263	0.825607	0.847922	1.20708	1.13006
100	0.142454	0.224683	0.440912	0.402439	0.385617	0.25381	0.282718	0.293124	1.01726	1.17397	0.925161	1.20753	0.852156	0.834955	1.22551	1.10368
120	0.143758	0.239523	0.466769	0.432494	0.404042	0.263749	0.259233	0.306976	1.0388	1.1646	0.937951	1.24492	0.771216	0.841096	1.28672	0.997744
140	0.148142	0.2469	0.451657	0.432276	0.440429	0.281998	0.280114	0.325151	1.02193	1.1666	0.912057	1.24972	0.7979	0.832281	1.22673	1.06894
160	0.150393	0.247133	0.456674	0.469214	0.432369	0.285716	0.311726	0.349746	0.994532	1.16967	0.861046	1.26852	0.814023	0.783038	1.20406	1.05977
180	0.151599	0.265235	0.451219	0.525252	0.446594	0.296597	0.305152	0.363311	0.959452	1.16552	0.886708	1.29042	0.808379	0.736164	1.28591	1.07719
200	0.160753	0.288471	0.452307	0.515	0.434988	0.305251	0.302086	0.364757	0.963959	1.15327	0.864152	1.27561	0.784106	0.682635	1.2586	1.02312
220	0.156395	0.273873	0.478179	0.482497	0.444957	0.301532	0.308365	0.372924	0.933485	1.15469	0.895929	1.20514	0.753207	0.67496	1.24259	1.11276
R149Q Interphase
Time (Seconds)	Bleached									Unbleached
-35	1	1	1	1	1	1	1	1	1	1	1	1	1	1	1	1	1	1
-30	1.05004	1.01167	0.978391	1.00456	0.974078	1.00058	0.992957	1.00099	0.983265	0.967375	1.03743	0.992833	0.986316	1.01616	1.01516	0.977048	0.99868	0.995761
-25	1.01319	1.00358	0.984258	1.0112	0.981145	1.01525	0.989697	1.0157	0.978434	0.976343	1.02825	0.994342	1.00477	1.02733	1.00167	1.01622	1.01514	1.01174
-20	1.0149	1.02441	0.989734	0.996394	0.989335	1.00537	0.985409	1.01139	0.985042	0.979344	1.07154	1.00042	0.9805	1.03044	1.01176	0.999964	0.997222	1.02148
-15	1.04192	1.05054	0.99038	0.976105	1.00668	1.01917	0.998588	1.02778	0.9866	1.006	1.03918	1.00259	0.997876	1.03219	1.00462	1.00413	1.01787	1.01288
0	0.266507	0.279761	0.191649	0.231316	0.231108	0.266115	0.320114	0.120097	0.204164	0.966908	1.04882	0.940203	0.958109	1.00694	0.991133	0.945898	0.949389	0.933338
20	0.508971	0.624978	0.368601	0.425446	0.399095	0.47944	0.554616	0.374824	0.415563	1.02695	1.0865	1.00545	1.06462	1.06314	1.0528	1.05553	1.03284	0.992741
40	0.691074	0.819707	0.544582	0.562993	0.542013	0.660757	0.705294	0.557142	0.552657	1.00575	0.992	1.00293	1.06828	1.09395	1.02894	1.06981	1.03023	1.01009
60	0.801276	0.936058	0.637682	0.623597	0.62309	0.776922	0.752395	0.659875	0.649189	0.970966	1.00727	0.975503	1.08686	1.05888	1.01442	1.04992	1.04895	0.992741
80	0.853411	1.00425	0.704826	0.643854	0.689448	0.862491	0.792967	0.73282	0.686058	0.952862	0.97103	0.960569	1.07345	1.03744	1.01575	1.06411	1.03789	1.00441
100	0.88043	1.08809	0.742837	0.670126	0.715795	0.952274	0.838951	0.774555	0.737618	0.90407	0.936776	0.934789	1.07561	1.02364	0.964084	1.05017	1.03455	0.966215
120	0.937848	1.09945	0.800017	0.68424	0.727519	1.01992	0.873423	0.822026	0.75729	0.900857	0.897353	0.93874	1.06161	0.983702	0.946275	1.04043	1.03148	0.97138
140	0.963837	1.13945	0.841896	0.721603	0.762938	1.06802	0.92263	0.860039	0.777917	0.863752	0.898785	0.939737	1.02882	0.983027	0.919164	0.993642	1.03968	0.977594
160	0.984655	1.14198	0.878203	0.751562	0.7564	1.08878	0.931779	0.907351	0.835907	0.853975	0.870934	0.938717	1.01006	0.945824	0.867498	0.995219	1.03321	0.971783
180	0.994292	1.22436	0.884578	0.760075	0.784621	1.14692	0.978518	0.93328	0.826644	0.829983	0.889682	0.942423	1.00015	0.931622	0.875176	0.954571	1.03086	0.985986
200	1.04552	1.18877	0.893509	0.792834	0.777452	1.21907	1.01615	0.947816	0.856319	0.78281	0.851692	0.90337	0.969733	0.903584	0.865176	0.950991	1.03742	1.00236
220	1.05957	1.26642	0.932899	0.794597	0.784834	1.24937	1.05229	0.981793	0.886591	0.792412	0.863017	0.917548	0.965831	0.887997	0.851617	0.921752	1.02828	0.997398
R149Q Metaphase
Time (Seconds)	Bleached														Unbleached
-35	1	1	1	1	1	1	1	1	1	1	1	1	1	1	1	1	1	1	1	1	1	1	1	1	1	1	1	1
-30	0.949545	0.978172	1.00757	1.01213	1.01656	1.02188	0.999763	1.206	0.989916	1.03935	0.992231	0.984013	1.03602	1.00509	1.0075	1.00218	0.994714	1.02411	0.98269	0.967157	0.970246	0.953817	0.89893	0.962151	1.01635	0.976648	0.987884	1.02251
-25	0.987265	0.962632	1.02529	1.02777	1.0115	1.0107	1.04656	1.11288	0.972198	1.02695	0.965767	0.965215	1.06002	0.992529	1.04107	1.02291	0.943591	1.03502	0.967644	1.01051	0.920171	1.03877	0.887222	1.02118	1.01542	1.00888	0.978335	1.03594
-20	1.0347	0.973509	1.08309	0.966702	1.00485	0.969875	1.01739	1.18232	0.977582	0.964931	0.954871	0.946182	1.06861	0.964453	1.02332	1.03266	0.963071	1.00992	0.923586	1.04528	0.882729	1.02201	0.926692	0.982364	1.01618	1.01376	0.988117	1.0356
-15	1.08759	0.998215	1.09899	0.98714	0.967267	1.01916	1.0305	1.02826	0.990126	1.05916	0.949782	0.962016	1.02288	0.967253	1.02852	1.00551	0.930409	1.01293	0.906456	1.0198	0.954646	1.03396	0.992363	0.954656	1.00786	1.03027	0.989914	1.00224
0	0.235214	0.151103	0.147572	0.174684	0.154101	0.214325	0.201555	0.21861	0.135351	0.29454	0.244663	0.290005	0.250377	0.261699	0.895014	0.805893	0.646256	0.87388	0.792493	0.847007	0.810518	1.02396	0.815815	0.90198	0.898064	0.837507	0.859638	0.899257
20	0.255525	0.203755	0.167639	0.187491	0.185902	0.311796	0.260991	0.278134	0.157017	0.319884	0.256288	0.316667	0.281071	0.256061	0.977933	0.817554	0.688979	0.859521	0.916149	0.90823	0.820284	0.835356	0.83245	0.984082	0.941017	0.920498	0.885647	0.950778
40	0.263368	0.200873	0.173543	0.197534	0.192286	0.360418	0.263461	0.340519	0.160487	0.325931	0.263559	0.319249	0.303509	0.262462	0.94205	0.782649	0.749543	0.896713	0.967662	0.865405	0.821404	0.955516	0.862664	0.97876	0.971197	1.01771	0.800718	0.969541
60	0.268829	0.22446	0.173964	0.217941	0.197317	0.368327	0.284311	0.366441	0.164785	0.314988	0.239321	0.319266	0.329151	0.260883	1.01078	0.835995	0.780552	0.954289	0.941012	0.827571	0.815494	0.943189	0.886695	0.945995	0.899081	0.968218	0.859667	0.973685
80	0.282433	0.231671	0.185716	0.217311	0.194982	0.385013	0.281505	0.36209	0.169993	0.334243	0.253494	0.324303	0.330189	0.249687	0.882357	0.787832	0.835536	0.945809	1.03114	0.844639	0.783622	0.931006	0.80457	0.923411	0.951993	0.940979	0.864428	0.970762
100	0.298776	0.237632	0.181358	0.205254	0.183699	0.419592	0.29106	0.380205	0.167806	0.34838	0.249668	0.332524	0.319667	0.251866	0.962088	0.799621	0.865615	0.919359	0.987927	0.846315	0.814899	0.93578	0.826229	0.975032	0.900439	0.935372	0.881343	0.897726
120	0.322937	0.239666	0.191892	0.197258	0.192053	0.43656	0.318046	0.402379	0.17878	0.357085	0.268026	0.34039	0.329504	0.255624	0.936429	0.737535	0.803582	0.912553	0.989741	0.857955	0.800636	0.870803	0.7342	0.953967	0.949748	0.932349	0.841752	0.898937
140	0.344567	0.25635	0.195547	0.184086	0.19015	0.439826	0.353906	0.389793	0.182599	0.363486	0.247724	0.352375	0.321274	0.269016	1.02715	0.801243	0.849236	0.855927	0.972395	0.829065	0.804429	0.884621	0.804752	0.968164	0.961694	0.934225	0.844108	0.908985
160	0.38138	0.236508	0.196601	0.172672	0.191847	0.455247	0.356999	0.406457	0.195721	0.365476	0.236184	0.357672	0.341762	0.272908	1.07693	0.831218	0.860293	0.879654	0.948442	0.823636	0.751117	0.908605	0.736813	0.994553	0.925244	0.971441	0.8898	0.886
180	0.398544	0.241425	0.201645	0.173476	0.198022	0.494186	0.395427	0.426159	0.196056	0.36909	0.245334	0.358021	0.339268	0.283441	1.10154	0.809956	0.882282	0.90559	0.982906	0.860669	0.757476	0.905696	0.742346	1.0192	0.925635	0.958504	0.892791	0.900818
200	0.409572	0.247566	0.209672	0.17472	0.197738	0.479482	0.416188	0.43051	0.206808	0.379678	0.260601	0.377426	0.3427	0.29281	1.12886	0.793116	0.875963	0.914977	1.01582	0.795001	0.765983	0.919788	0.74968	1.00294	0.945945	0.97587	0.884596	0.914748
220	0.399997	0.260911	0.213396	0.166672	0.210313	0.479482	0.430773	0.419511	0.223762	0.391302	0.259982	0.374065	0.370644	0.283238	1.17663	0.80678	0.883987	0.925144	0.971375	0.835713	0.769661	0.951052	0.80613	0.991642	0.952645	0.951352	0.937331	0.923097
R149Q Anaphase
Time (Seconds)	Bleached							Unbleached
-35	1	1	1	1	1	1	1	1	1	1	1	1	1	1
-30	0.991621	0.901977	0.996131	1.00394	1.06985	0.967676	1.02412	0.979804	0.953452	1.01101	0.974277	1.03955	0.997047	0.967093
-25	0.981669	0.949825	1.00088	1.04465	1.03954	0.949928	1.04471	0.970712	0.937249	1.02729	0.96043	1.09138	0.99391	0.984691
-20	0.981305	0.840495	0.9993	1.06646	1.04458	0.966959	1.04727	0.954393	0.900275	1.0351	1.00362	1.06336	1.01394	0.98698
-15	0.994495	0.838012	1.02499	1.0595	1.01408	0.95259	1.04292	0.956561	0.972222	1.06302	0.964946	1.06539	1.06431	1.0147
0	0.148335	0.236334	0.124963	0.306814	0.219896	0.396791	0.321448	0.755367	0.771018	1.02998	0.882976	0.985719	0.975102	0.929477
20	0.177245	0.275129	0.288657	0.343002	0.25718	0.439416	0.345966	0.759078	0.710269	1.1103	0.951373	1.06909	1.04586	1.00293
40	0.170702	0.301489	0.32853	0.35695	0.254812	0.454843	0.35862	0.657792	0.783931	1.16474	0.897327	1.02592	1.09369	0.926746
60	0.168556	0.30781	0.351562	0.333868	0.268758	0.515905	0.372585	0.69298	0.831003	1.1249	0.876151	1.01892	1.0535	0.978827
80	0.166443	0.324125	0.357238	0.352533	0.25745	0.530346	0.381591	0.778298	0.83243	1.07891	0.902888	0.992768	1.02791	0.994603
100	0.1599	0.315714	0.393573	0.341966	0.256428	0.575058	0.367725	0.808752	0.843916	1.1107	0.90412	1.00814	1.02425	1.05625
120	0.181432	0.343067	0.457879	0.343239	0.267015	0.618442	0.369793	0.81738	0.837911	1.07264	0.891766	0.98725	1.04783	1.02871
140	0.184828	0.348644	0.459095	0.342501	0.278482	0.630355	0.376621	0.81265	0.79608	1.07763	0.790137	0.965321	1.08957	1.01996
160	0.188029	0.356547	0.42685	0.345145	0.279331	0.62912	0.38216	0.816088	0.766588	1.07853	0.772707	0.923049	1.04109	0.954953
180	0.186142	0.349585	0.42615	0.3324	0.27973	0.660187	0.397193	0.777505	0.792176	1.05508	0.868469	0.948298	1.10999	0.951696
200	0.190852	0.360779	0.507849	0.330557	0.272534	0.669941	0.415539	0.765417	0.839387	1.03459	0.847654	0.948602	1.18339	0.958833
220	0.196548	0.364762	0.495946	0.337548	0.281666	0.688066	0.398983	0.729856	0.876887	1.02396	0.773242	0.982362	1.24314	0.90959
V475G Interphase
Time (Seconds)	Bleached						Unbleached
-35	1	1	1	1	1	1	1	1	1	1	1	1
-30	1.01259	1.01127	1.01143	1.01599	0.993167	1.01244	1.00498	0.993603	0.997378	1.00242	0.998733	0.995413
-25	1.00794	1.02639	1.00125	1.0091	1.01507	1.03388	1.01283	1.00367	0.980437	1.00745	0.980483	1.00754
-20	1.00682	1.02826	1.01926	1.00825	1.02047	1.0207	0.981522	0.992808	0.989996	0.979354	0.972857	1.01979
-15	0.998379	1.01864	1.02892	1.02302	1.0134	1.00724	1.00251	1.00575	0.992429	0.988183	0.971795	1.0118
0	0.159164	0.289371	0.16098	0.167524	0.208956	0.26771	0.931881	0.872768	0.915654	0.847076	0.911566	0.971732
20	0.443343	0.550704	0.374761	0.324918	0.39938	0.612811	0.986559	0.903732	0.976627	0.902182	0.971323	1.02253
40	0.647195	0.743174	0.538927	0.450274	0.550105	0.856107	0.905339	0.847487	0.908356	0.865258	0.973274	1.01505
60	0.752021	0.83735	0.628413	0.511491	0.650091	0.940347	0.851922	0.793112	0.874962	0.826901	0.942686	1.01026
80	0.835847	0.91419	0.704763	0.564389	0.720411	0.987203	0.79431	0.759022	0.810707	0.810255	0.956347	1.01403
100	0.908383	0.95389	0.750402	0.590577	0.767543	1.01965	0.748983	0.7134	0.784145	0.801519	0.936329	1.00205
120	0.941942	1.01864	0.77257	0.634078	0.801182	1.0824	0.713083	0.688857	0.726594	0.775519	0.919234	0.989741
140	1.01047	1.08889	0.804353	0.660756	0.840271	1.1101	0.710125	0.688061	0.707537	0.767268	0.892299	0.982199
160	0.986039	1.08304	0.851599	0.687557	0.875094	1.13749	0.706382	0.670284	0.688207	0.74788	0.870103	0.988235
180	1.09502	1.13548	0.903433	0.71772	0.906776	1.15516	0.670934	0.648956	0.667478	0.740628	0.849496	0.972034
200	1.11498	1.19304	0.894565	0.744811	0.932651	1.19803	0.650578	0.641611	0.648781	0.707532	0.818768	0.979005
220	1.11256	1.21501	0.932517	0.766387	0.959683	1.21933	0.638287	0.638066	0.637766	0.693666	0.800589	0.964316
V475G Metaphase
Time (Seconds)	Bleached												Unbleached
-35	1	1	1	1	1	1	1	1	1	1	1	1	1	1	1	1	1	1	1	1	1	1	1	1
-30	0.928997	1.00576	1.02571	1.01469	1.00797	1.0563	0.944979	1.18703	1.01766	0.955958	0.99257	0.978486	1.01816	0.950301	0.967545	1.02549	0.923976	1.00763	0.985443	1.00081	0.991715	1.00088	0.971134	0.972164
-25	0.945606	1.01583	0.971255	0.950307	1.11833	1.05933	0.972174	1.09937	0.985934	0.976522	1.01224	0.978966	1.03509	0.897201	0.973818	0.890759	0.908744	1.01253	0.996499	0.989399	1.00419	0.975803	1.00882	0.971265
-20	1.00036	1.01081	0.958378	0.942302	0.999476	1.08273	0.989893	1.16953	0.933775	0.887499	0.992253	1.00525	1.06343	0.901481	0.977969	0.950083	0.906163	1.00791	0.991336	0.975514	0.986085	0.971166	1.02514	0.950704
-15	1.00882	0.936377	0.975925	0.971271	0.902822	1.14794	0.953153	0.967507	0.984651	0.990278	0.965317	0.96774	0.985139	0.857235	0.962229	0.896663	0.858427	0.968515	0.942934	1.0456	0.962798	0.986399	1.05796	0.9462
0	0.14376	0.194095	0.182938	0.14853	0.123835	0.215255	0.144965	0.324259	0.205644	0.249107	0.317015	0.247672	0.826672	0.776066	0.784567	0.796345	0.647416	0.821525	0.820004	0.903779	0.652463	0.830441	0.890457	0.794957
20	0.157274	0.239011	0.2398	0.16112	0.166413	0.332177	0.172088	0.393372	0.258078	0.261935	0.331396	0.268726	0.92083	0.760236	0.794364	0.881359	0.747368	0.750076	0.845875	1.00758	0.767181	0.873974	0.899458	0.886999
40	0.163711	0.25613	0.27194	0.159925	0.185946	0.370459	0.177743	0.398059	0.277908	0.257939	0.336767	0.302061	0.96173	0.813231	0.80294	0.834074	0.835184	0.756079	0.835978	0.927925	0.833674	0.901003	0.957075	0.903868
60	0.165721	0.268397	0.26522	0.162963	0.200762	0.373555	0.179932	0.378721	0.297114	0.274155	0.333127	0.275114	0.978883	0.777838	0.784679	0.877593	0.860839	0.768906	0.841337	0.925184	0.864044	0.847086	0.984446	0.921121
80	0.16243	0.275811	0.270856	0.169221	0.212874	0.386874	0.19026	0.390479	0.310462	0.288141	0.331876	0.263322	0.913119	0.772133	0.747669	0.873221	0.836738	0.781364	0.854383	0.934928	0.903203	0.884886	1.0125	0.933822
100	0.171758	0.281468	0.279278	0.168541	0.21938	0.374733	0.187342	0.400146	0.334376	0.295715	0.322148	0.252698	0.97634	0.802976	0.796533	0.858514	0.79173	0.791616	0.85626	0.983912	0.87202	0.94511	1.03569	0.928781
120	0.1768	0.285267	0.27607	0.179789	0.228277	0.38723	0.18214	0.386813	0.332609	0.303092	0.32876	0.25932	0.983313	0.843353	0.786262	0.944334	0.785352	0.791314	0.852865	0.993173	0.818631	0.878034	1.05706	0.944058
140	0.178578	0.294921	0.280289	0.165303	0.236742	0.389867	0.189141	0.375635	0.322251	0.288982	0.332723	0.261088	1.01563	0.775533	0.789457	0.905004	0.840717	0.791117	0.825973	0.969992	0.938661	0.835483	1.07324	0.952306
160	0.173495	0.297521	0.301185	0.16522	0.245927	0.41106	0.184696	0.392044	0.331179	0.295471	0.330926	0.257521	1.00109	0.720592	0.771019	0.914121	0.884345	0.794893	0.809701	0.921394	0.930578	0.873037	1.082	0.955881
180	0.185619	0.29034	0.311045	0.167578	0.246175	0.409741	0.19051	0.390647	0.318137	0.286858	0.327063	0.251466	0.933697	0.711056	0.819302	0.932604	0.763573	0.78384	0.833254	1.03251	0.800056	0.905702	1.06072	0.937535
200	0.20174	0.287791	0.310358	0.166519	0.267994	0.421031	0.190645	0.406333	0.336723	0.298689	0.335819	0.258857	0.955021	0.707231	0.814009	0.943927	0.744797	0.87289	0.845605	1.02235	0.881532	0.924611	1.1156	0.928024
220	0.194275	0.297494	0.304629	0.1703	0.26845	0.407282	0.196465	0.434417	0.332995	0.288319	0.351418	0.261097	0.941735	0.801709	0.83709	0.960791	0.770241	0.844255	0.8264	1.06091	0.872288	0.89328	1.10703	0.921853
V475G Anaphase
Time (Seconds)	Bleached							Unbleached
-35	1	1	1	1	1	1	1	1	1	1	1	1	1	1
-30	1.02606	1.02376	1.00509	1.01897	0.994793	1.04952	1.0295	1.08915	1.02923	0.989582	0.984489	1.00923	0.995204	0.984662
-25	1.06495	1.0189	0.992219	1.05667	0.966156	1.0952	1.0192	1.06992	0.99924	0.971966	0.991297	0.983386	0.981908	0.984159
-20	0.984716	1.05129	1.03101	1.07147	0.980466	1.15448	1.02885	1.0738	0.985661	1.04973	0.950578	0.999696	1.03116	0.976833
-15	0.998175	1.05976	1.00405	1.06128	0.944983	1.19049	1.03408	1.04523	0.989745	1.03896	0.932888	0.966337	1.02912	0.956977
0	0.136725	0.14972	0.293166	0.304317	0.246829	0.287069	0.169738	1.02951	0.961139	1.01278	0.905849	0.830048	0.912303	0.810218
20	0.159862	0.172239	0.476701	0.342229	0.310612	0.308331	0.176782	1.16407	0.983885	1.07634	0.905352	0.988835	0.961014	0.8621
40	0.190037	0.169317	0.540306	0.382145	0.333665	0.329844	0.175244	1.16068	1.00681	0.945416	0.858166	1.0559	0.892964	0.855413
60	0.196286	0.173319	0.564792	0.405767	0.321003	0.344178	0.179672	1.16916	0.959726	0.922798	0.837522	1.06406	0.944593	0.803847
80	0.201201	0.17139	0.583429	0.404188	0.325386	0.350659	0.208687	1.08568	0.924298	0.940207	0.782565	1.05098	0.923367	0.806323
100	0.204326	0.207408	0.601236	0.410841	0.32412	0.334485	0.207912	1.07839	0.977449	0.946202	0.745298	1.06446	0.991678	0.773928
120	0.208549	0.231493	0.588234	0.415196	0.33885	0.318258	0.213465	1.04534	0.98374	1.01641	0.709428	1.04672	0.979498	0.710105
140	0.209842	0.249826	0.603982	0.427003	0.341186	0.311338	0.204588	0.99488	1.00084	1.03218	0.657891	1.01462	0.983063	0.742851
160	0.200206	0.262763	0.600549	0.437585	0.341927	0.308383	0.199602	0.9492	1.01512	1.063	0.649531	1.00066	0.981908	0.733551
180	0.212503	0.269818	0.60391	0.454217	0.321402	0.318691	0.202471	0.977362	0.997701	1.08419	0.627555	1.00947	1.01975	0.710615
200	0.207416	0.269797	0.608115	0.440308	0.334507	0.319071	0.211987	0.938076	0.959711	1.09997	0.608779	1.03611	1.03456	0.717303
220	0.211439	0.270717	0.658032	0.458519	0.339017	0.318544	0.209514	0.934191	0.942334	1.04773	0.574894	1.07076	1.05204	0.689228
