# Supplementary material for: Pathogenic mutations in the chromokinesin KIF22 disrupt anaphase chromosome segregation
Source: eLife journal article supplement (doi:10.7554/elife.78653), 2022-06-22
Supplement: supp [file F2 FS1 KIF22 Expression HeLaK.xlsx]

## Sheet: Sheet1
Control Knockdown, Untreated
GFP	KIF22-GFP	KIF22-GFP R149Q	KIF22-GFP P148L	KIF22-GFP P148S	KIF22-GFP R149L	KIF22-GFP V475G
0.879265	0.551946	1.00257	1.08981	1.06726	0.833007	1.01588
0.92211	0.942663	1.10688	1.04092	1.06137	0.877103	1.05964
0.969651	0.991835	1.23544	0.957429	0.866864	1.04613	0.697036
1.11401	1.29681	1.11351	1.04995	0.911059	0.951133	0.85194
1.18028	1.08176	0.972468	0.706159	1.09345	1.05765	0.884547
0.919372	1.13498	1.04727	1.42073		1.23498	0.898549
1.0153		0.911919	0.884048			1.02202
		0.805114	0.850959			1.14362
		0.804834		1.19868	1.08577	1.06783
				1.09516	0.821457	0.941923
			1.22274	1.02726	0.945419	1.41701
		1.20861	0.578978	1.02207	1.08718
		1.1088	0.932572	1.13513	0.913823
		1.1468	0.934987	0.863882	1.02499	0.915546
		0.762027	0.695489	0.914081	1.03014	1.12164
		1.07661	1.05633	0.820622	1.09122	0.962598
1.0737	1.03048	1.05511	0.999206	0.92311		1.06552
0.81971	1.15326	0.891775	0.876181		1.1162	1.12604
0.972147	1.03104	0.690469	1.11112	0.729526	1.13866	0.916095
0.94144	1.07447	1.01725	1.5924	0.984829	0.8592	1.09143
0.969689	1.00312	0.888028		1.00821	0.932828	0.987042
0.972001	1.0744	1.0057		1.03099	1.14171	0.978371
1.07999	0.790628	1.07026	1.01141	1.23301	0.558219	0.873599
0.992169	0.84261	1.07856	0.908631	1.04641	1.15947	0.962123
1.00665			0.866703	0.90757	1.06022
1.17251			0.944276	0.733026	1.00017
		1.10928	1.27161	1.08293	0.872344	0.732319
1.12831	0.964391	0.831179	1.10903	1.07174	1.17877	1.08909
0.912056	1.23094	1.04544	0.754009	1.17176	0.96929	0.917467
0.924028	0.93482	0.96828	0.633054		1.01291	1.19903
1.11681	1.10404	1.04582	1.30982			1.18722
1.11428	0.89221		1.19146			0.947921
0.864052	0.9399					0.892484
0.879035	1.06365					1.03447
0.894029	1.09194
0.880085	0.94157
1.28732	0.836528
Control Knockdown, Doxycycline
GFP	KIF22-GFP	KIF22-GFP R149Q	KIF22-GFP P148L	KIF22-GFP P148S	KIF22-GFP R149L	KIF22-GFP V475G
0.810818	2.02507	3.08387	2.61156	1.41839	1.56155	2.76468
0.928717	3.81457	0.735733	1.60559	1.97424	2.05969	3.19495
1.30941	2.4062	0.404349	1.0435	1.82877	3.71386	2.47978
1.15292	2.82799	1.85495	1.56046	1.86347	3.02903	1.51437
0.942594	3.2184	3.30177	0.902502	1.96218	2.5381	1.80334
		3.45653	2.41438	2.00749	1.53711	3.87672
		1.95039	0.776415		3.2722	3.41111
		2.42054	0.977112			1.63915
		2.07502	4.16703	0.567181	0.57526	1.0488
		1.94317	1.29635	1.74191	0.547772	5.26779
		2.21462		1.00931	0.521704	2.66236
			4.57815	1.85974	1.07161
			5.99539	0.792293	0.712548
		2.09685	2.93892	1.24153	0.904395	1.47458
		3.97668	1.50113	2.97307	0.472955	2.56953
		1.22358	4.83197	0.627767	0.78712	1.23864
1.09259	1.50298	2.19493	7.69379	1.56714	0.777919	2.10014
0.756358	2.17435	4.12473	5.11031		0.747692	2.62669
1.10134	0.968671	1.18721	4.97902	1.95434	0.823556	2.37503
0.840821	1.9644	0.990412	4.97916	0.677089	0.696444	2.775
0.827396	2.77864	3.25754	1.32436	1.71086	1.36064	1.13162
0.829972	1.11408	1.82565		3.75987		1.35496
0.747096	2.45849	1.76794		3.32569	1.27926	1.3863
0.496267	1.6515	4.54311	4.67631	4.11584	1.90004	0.94263
	1.59069	3.17598	6.0347	1.16387	1.9097	1.77767
		1.70809	1.05473	0.980801	4.08292	1.17156
0.74538	2.14998		1.74571	2.90522	3.41896
0.872043	2.40015		3.82729	2.03862	1.97477
0.813506	0.541228	1.83987	2.27123	1.48836	3.01773	1.11003
0.795809	0.894731	0.972219	3.30847	2.05256	1.26119	1.62256
0.907043	0.951965	1.5595	1.80276		2.50199	0.80943
0.92944	2.45683	0.931307	5.37127		1.85389	1.56518
1.00523	1.63176	4.25388	3.15013			1.22235
0.910744	0.937387	0.865509				1.44146
1.00098	1.9469	0.939654				2.16262
0.893754	2.38281					1.14742
1.02306						1.21748
KIF22 Knockdown, Untreated
GFP	KIF22-GFP	KIF22-GFP R149Q	KIF22-GFP P148L	KIF22-GFP P148S	KIF22-GFP R149L	KIF22-GFP V475G
0.159638	0.104714	0.196966	0.137402	0.119023	0.130422	0.062541
0.168869	0.119661	0.151971	0.107564	0.103337	0.13515	0.08788
0.138993	0.147064	0.128294	0.14033	0.097402	0.11906	0.091265
0.149685	0.109416	0.145635	0.131205	0.122615		0.107647
	0.134954	0.161848	0.160537	0.101611	0.105523	0.080288
	0.144148	0.184766	0.178038	0.132268		0.077484
		0.297084	0.153712			0.137599
		0.169157	0.137841			0.11768
		0.139087	0.133766	0.093692	0.0813	0.117352
		0.180745		0.093593	0.070084	0.113158
			0.105917	0.086318	0.086421
			0.083287	0.085736	0.081767
		0.148204	0.08316	0.081146	0.079383	0.097083
		0.118838	0.095882	0.090985	0.08612	0.136942
		0.123793	0.047387	0.076293	0.076048	0.129224
		0.121059	0.157437	0.076905	0.055793	0.157266
0.126845	0.111922	0.12531	0.169328		0.088096	0.102973
0.090006	0.131702	0.143173	0.122465	0.131666	0.088376	0.125101
0.112099	0.098846	0.164553	0.141371	0.12661	0.065002	0.115497
0.114249	0.10074	0.141822	0.124929	0.214209	0.091678	0.112047
0.110945	0.106608	0.108931	0.153066	0.131206		0.115952
0.118531	0.089154	0.110896		0.129215	0.158578	0.112664
0.104478	0.094855	0.131874		0.131815	0.10845
	0.091241		0.166543	0.134305	0.12499
	0.094741		0.169638	0.117208	0.151234	0.142832
	0.11449	0.154054	0.162101		0.145043	0.137867
	0.122996	0.157628	0.172973		0.134885	0.130769
	0.113739	0.169293	0.169003			0.1381
	0.099838	0.165423	0.209896			0.166922
		0.159347	0.182843
0.130392	0.140661	0.189242	0.183218
0.136844	0.152769		0.207003
0.159763	0.093003		0.154381
0.153834	0.133766		0.169391
0.173769	0.120276		0.19641
0.162403	0.160426
0.194273	0.158791
0.17536	0.164807
0.161872	0.156944
0.145489	0.125697
	0.13995
	0.101864
KIF22 Knockdown, Doxycycline
GFP	KIF22-GFP	KIF22-GFP R149Q	KIF22-GFP P148L	KIF22-GFP P148S	KIF22-GFP R149L	KIF22-GFP V475G
0.196665	2.31101		1.67654	0.770838	2.85711
0.146455	1.6298		3.33442	3.6667	1.14626
0.207712	2.52443		1.20875	1.82644	1.35017
0.166678	3.25749		0.927554	1.77955
0.187536	3.22339		1.82834	0.895517
	1.14665		1.9534
			0.667403
			2.64822
				2.52525	0.925355
			3.15866	1.12837	1.06589
		2.24671	0.947185	0.570754	0.896126	1.22134
		3.95721	2.90345	1.9788	0.486893	4.17694
		3.2218	4.99086	1.82756	1.26673	1.34615
		1.79982	5.45416	0.83224	0.788067	1.47669
		1.45208	1.71725	1.21663	2.10525	1.90986
		2.07947	3.72146	0.950779	0.772991	0.953284
0.117957	2.47506	1.85769	3.70978	0.683472	0.578931	2.11826
0.136876	0.805368	2.90521	5.76429	1.23188	0.616443	1.84692
0.116595	0.992035	2.03654	3.00846	1.83485	0.819744	1.66122
0.130214	1.97901	2.24229	2.07574			3.12059
0.121941	1.58544	0.879993	2.71854	0.389014	1.26564	1.25381
0.101952	1.034			0.907017	1.71522	2.8647
0.100853	1.52846			4.41648	1.5814
0.114952	1.72274	1.22915	4.34579	2.10607	1.8654
0.111338	1.65796	1.26887	2.03952	3.6463	2.16134	2.09017
0.122968	2.98346	1.2642	1.32257	1.8388	0.755138	1.35441
0.114081		0.193215	1.28995	1.84523	2.15098	4.39699
		1.19823	1.67074	1.4054	1.23049	1.57504
		1.90293	1.08706	2.72658	2.27375	1.51376
0.1404	3.55384	0.146951	5.10591	2.15477	1.57228	4.10679
0.14362	3.16385	2.6441	1.5873	2.30654	1.39115	1.87377
0.124149	1.04032	0.438872		1.54611	1.58288	2.7961
0.162788	2.56659	0.819738			0.760883	2.40694
0.172957	2.77843	0.701698				1.68106
0.148362	1.59031	0.667777				1.62311
0.141474	2.77199	1.08704
0.175601	4.71725
0.160902	1.05143					0.808712
0.152245	3.3809	2.28595				0.77623
		2.70662				0.660677
		2.21863				3.47678
		1.41525				0.358415
		4.53115				3.40287
		3.42339				0.606763
		1.57505				1.55916
		2.54009				1.13755
						0.142832
