# Supplementary material for: Pathogenic mutations in the chromokinesin KIF22 disrupt anaphase chromosome segregation
Source: eLife journal article supplement (doi:10.7554/elife.78653), 2022-06-22
Supplement: supp [file F2 FS1 KIF22 Expression RPE1.xlsx]

## Sheet: Sheet1
Control Knockdown, Untreated
GFP	KIF22-GFP	KIF22-GFP R149Q	KIF22-GFP V475G
1.16595	1.18869	1.06428	1.06713
1.13421	1.06295	1.19683	0.897508
1.21983	0.869351	1.01076	0.971613
1.1135	0.915652	1.22743	1.07178
0.652678	0.904452	0.790063	0.947157
1.17395	1.02412	0.759247	1.15732
0.539868	1.04987	1.041	0.887486
	1.12094	0.896158
	0.863975	1.01423
1.00672	1.02453	1.25715	1.38801
0.680628	0.975427	0.690324	0.86026
0.81163	1.1879	1.19487	0.896068
1.54323	1.08431	1.43632	1.05541
0.689079	0.86963	0.718089	0.827917
1.36906	1.05681	0.748191	0.866709
0.924847	0.706807	0.716965	1.0141
0.974808	0.990548	1.23808	0.82443
	1.10404		1.13609
			1.12857
			1.00243
1.30069	0.758014	1.0209	0.794172
0.965069	1.095	0.786782	1.16968
0.746517	0.937129	1.20861	1.1363
1.06892	1.18632	1.10594	1.14002
0.942628	1.31718	1.16321	1.20317
0.799543	0.775708	0.930645	0.701696
1.07094	0.793608	0.912756	1.0157
1.1057	0.709681	0.871156	1.19045
	1.42736		0.648821
Control Knockdown, Doxycycline
GFP	KIF22-GFP	KIF22-GFP R149Q	KIF22-GFP V475G
1.33163	3.84302	5.6831	7.11607
1.03454	5.19449	5.09033	8.90529
1.3217	2.66671	5.28867	7.42868
0.996896	5.22349	4.6027	7.75552
1.10052	5.35776	7.3626	4.87851
1.05114	4.69651	2.46614	9.58891
1.15548	3.74043	4.78362	8.59799
	3.63186	6.45816	5.32863
1.88689	2.89009	7.42971	3.72885
1.455	5.58383	8.69374	8.23685
1.5354	4.78117	9.03604	6.16132
1.17982	5.59192	7.83935	9.33408
1.53716	4.14728	10.036	7.24918
1.54699	1.34211	9.16361	8.17126
1.25928	7.58393	13.0712	6.69667
1.58353	5.70546	8.65096	4.81549
1.05524	3.95051	0.416472	6.45321
	6.00478	5.78536	4.14609
		6.89518	9.82886
			6.71112
0.706045	4.52732	6.05427	6.17743
0.977399	3.2247	2.4963	4.48752
1.16692	5.40645	2.5364	5.79424
1.01313	4.63052	4.12639	6.08981
1.22556	4.12122	8.32618	5.04925
0.9541	1.92688	3.9083	6.29519
1.01396	4.43639	4.15058	6.0821
0.93637	4.0959	5.54994	8.34126
	5.23093
KIF22 Knockdown, Untreated
GFP	KIF22-GFP	KIF22-GFP R149Q	KIF22-GFP V475G
0.289294	0.101574	0.538216	0.554795
0.386135	0.219887	0.62589	0.293922
0.301576	0.18679	0.624381	0.282804
0.33779	0.173803	0.528831	0.312685
0.297538	0.153678	0.658608	0.512594
0.212277	0.176513	0.388124
0.197436	0.201227	0.513623
0.228466
0.4476	0.191821	0.486612	0.244525
0.309911	0.489228	0.37869	0.488023
0.246875	0.212179	0.436349	0.43588
0.418404	0.290392	0.526859	0.475808
0.262671	0.209511	0.510661	0.460931
0.266052	0.241265	0.412503
0.320184	0.203537	0.390607
	0.093805	0.384815
0.205309	0.203274	0.534192	0.285421
0.21432	0.222695	0.334957	0.386271
0.196023	0.203819	0.519528	0.266786
0.201748	0.243685	0.513775	0.282786
0.077915	0.193363	0.595877	0.356737
0.082894	0.130722	0.393428	0.190488
	0.056987	0.463793	0.369839
	0.13698	0.522577	0.223469
	0.264882	0.581957	0.368712
			0.182743
			0.371807
KIF22 Knockdown, Doxycycline
GFP	KIF22-GFP	KIF22-GFP R149Q	KIF22-GFP V475G
0.345444	5.14105	3.7016	10.3162
0.399241	1.92053	4.10236	12.977
0.51333	3.85923	2.61307	6.3953
0.300348	3.65887	5.11924	7.63742
0.258955	4.03418	4.61296	11.9982
0.362622	2.88035	5.38267	2.81246
0.24359	3.88733	4.18977
0.216642	4.96319	5.76303
0.302313	3.92071	7.83903	8.39451
0.26634	5.10251	9.44369	7.66136
0.396381	4.72196	7.23656	9.3717
0.284839	3.40723	7.10729	9.75299
0.765852	3.64371	8.95676	6.68271
0.360132	3.26058	9.0241	8.19461
0.631179	6.07534	6.64436	8.11567
	2.83159	7.69011	6.69023
	2.31	3.93331	8.84701
	4.14698	8.3089	8.80448
0.315569	4.33648	3.98799	4.7342
0.235803	2.70109	5.49622	5.38521
0.2135	6.88885	6.47988	5.22685
0.222817	3.58461	4.49495	5.98656
0.19617	4.09673	5.05431	7.38592
0.168417	3.59422	1.81733	6.4198
0.153958	3.10056	8.22241	4.91338
0.157454	2.32578	5.98625	2.67714
0.162853	4.85804
	1.9109
	3.43285
