# Supplementary material for: Pathogenic mutations in the chromokinesin KIF22 disrupt anaphase chromosome segregation
Source: eLife journal article supplement (doi:10.7554/elife.78653), 2022-06-22
Supplement: supp [file F2 FS1 RPE1 Ploidy.xlsx]

## Sheet: Sheet1
GFP	KIF22-GFP	KIF22-GFP R149Q	KIF22-GFP V475G
45	46	44	45
	46	46	44
46	45	46	44
44	46	43
43	46	45	44
46	46	46	44
45	69		46
46		45	46
40	46	39	46
46	45	46	45
81	45	45	46
46	44	46	46
45	46	46	46
46	46		45
45	43	45
43	46	46	45
	45	46
	46	45	43
46	45	45	45
	46	46
	46	44
		45	46
		45	46
		46	46
		44	44
45	46	45	45
46	45	46
	44		43
	46	42	46
45	46	46	46
46	44
46	42	44	41
45	46	46	46
44	46		48
46	43	43	46
45	46	44	44
46	45		45
44	46	46	44
47	43	47	46
40	44	46	44
	41		45
45	46	45	46
46	45
41	46
43	46
44
46
45
44	46	45	46
46	47	47	45
45	39	38	43
46	43		46
43	46		44
46	44	58	46
			44
45	45	45	45
46	46	46	46
44	46	46	47
46	46	46	46
44	44	45	43
42	46	46	44
43	45	46	46
46	46	46	43
45	46	46	46
46	46	46	44
46	46	46	43
	44	44	45
45		45	46
46		46	44
			45
