# Supplementary material for: Pathogenic mutations in the chromokinesin KIF22 disrupt anaphase chromosome segregation
Source: eLife journal article supplement (doi:10.7554/elife.78653), 2022-06-22
Supplement: supp [file F3 Polar Ejection Forces HeLaK.xlsx]

## Sheet: Sheet1
Control Knockdown									KIF22 Knockdown
GFP	KIF22-GFP	KIF22-GFP P148L	KIF22-GFP P148S	KIF22-GFP R149L	KIF22-GFP R149Q	KIF22-GFP V475G			GFP	KIF22-GFP	KIF22-GFP P148L	KIF22-GFP P148S	KIF22-GFP R149L	KIF22-GFP R149Q	KIF22-GFP V475G
4.3222	3.8035				5.2731				0.8644	4.0629				5.446
3.8035	3.7171				3.8035				2.8527	3.9764				5.446
3.5442	3.7171				3.4578				0.8644	3.8035				3.6307
3.89	4.0629				4.668				1.2102	3.5442				4.7544
3.7171	2.5069				4.7544				0.0864	4.1493				4.3222
3.8035	3.8035				4.5815				0.0864	3.89				5.2731
3.2849	3.5442				4.5815				1.4695	3.112				3.1984
3.2849	3.89				4.7544				0.0864	3.2849				4.4086
	3.6307				4.4086				2.7662	3.6307
	3.7171				4.5815					3.6307
	4.5815				4.9273					5.1866
	4.668
3.7171	3.9764				3.89	3.89			2.5069	3.5442				4.0629	3.8035
3.5442	4.2358				4.4086	2.2475			0.0864	4.4086				2.9391	3.1984
3.6307	4.0629				3.7171	4.8409			1.9018	3.7171				4.668	3.0255
3.3713	4.0629				2.9391	3.2849			3.0255	3.2849				3.6307	3.3713
4.4086	4.3222				4.0629	4.3222			2.4204	3.8035				3.4578	3.9764
	4.4086				5.8782				2.2475	3.2849				3.1984
									1.3831	3.6307				3.1984
									1.9018
									2.5069
									1.9882
									3.0255
3.5442	4.0629				3.8035	4.0629			1.8153	3.5442				3.3713	3.3713
3.8035	3.5442				3.2849	7.002			2.334	2.9391				2.7662	3.3713
4.3222	3.1984				4.2358	3.9764			2.9391	3.3713				3.89	3.2849
3.5442	3.89				3.8035	4.4086			1.7289	3.4578				3.5442	2.7662
4.0629	4.4951				4.668	4.2358			0.0864	3.6307				3.6307	3.4578
4.4086	4.3222				4.5815	5.7918			0.6916	3.8035				3.9764	2.9391
3.8035	4.5815				4.4951	4.4086			2.5069	3.5442				3.0255	3.5442
3.2849	3.7171				4.4951	4.3222			0.3458	3.2849				3.3713	3.7171
3.5442	5.7918				3.9764	4.2358			1.9018	2.9391				4.668	3.5442
4.1493	3.0255				4.3222	4.2358			0.2593	3.2849				3.5442	3.2849
3.5442	3.8035				4.1493	3.7171			1.556	3.7171				3.6307	3.2849
2.9391	3.5442					3.7171			2.2475	3.2849					3.8035
4.1493	4.1493					3.4578			1.8153						3.112
3.7171	4.5815					3.6307			1.1238						2.7662
	3.8035					3.9764			1.4695						3.3713
	4.4086					3.7171			2.2475						3.112
	3.7171					3.9764			2.4204						3.2849
	2.7662					4.668
	3.5442					4.1493
	4.0629					3.89
	4.0629					3.4578
3.9764	3.5442	3.2849	3.1984	4.5815					1.8153	3.4578	3.5442	3.5442	5.446
3.4578	4.0629	3.4578	3.6307	5.3595					0.5187	3.1984	4.0629	3.7171	5.0138
3.2849	4.0629	3.5442	4.1493	4.4951					2.5069	3.2849	3.1984	4.1493	5.0138
3.8035	4.0629	4.4951	4.1493	5.446					2.6798	3.2849	3.8035	3.7171	4.5815
4.0629	4.0629	3.9764	3.5442	5.3595					1.6424	3.7171	3.8035	4.0629	5.2731
3.9764	4.4086	4.8409	3.6307	5.8782					1.556	3.4578	3.6307	3.8035	5.3595
4.0629	3.89	3.5442	3.89	5.5324					1.9018	4.9273	3.7171	3.1984	3.4578
3.8035	4.1493	3.5442	4.2358	4.3222					1.9018		4.0629	3.7171	3.5442
3.9764	4.0629	4.8409	4.0629	5.446					0.0864		3.1984	3.4578	4.8409
		4.1493	3.5442	5.5324							3.9764	2.7662	5.1866
		4.0629	4.0629	5.1002
			4.0629	4.8409
3.89	4.4951	4.1493	3.8035	5.2731					2.7662	3.6307	4.3222	2.8527	4.2358
3.8035	4.0629	3.89	3.89	3.5442					1.6424	3.4578	3.9764	3.6307	4.3222
3.4578	3.7171	3.3713	3.8035	2.6798					2.2475	4.2358	4.0629	3.4578	4.9273
3.9764	3.112	4.3222	3.89	3.8035					0.8644	3.0255	4.9273	4.0629	4.9273
3.7171	3.8035	3.8035	4.0629	4.0629					0.3458	3.9764	4.1493	3.6307	4.5815
3.89	4.3222	3.89	3.5442	4.2358					1.3831	4.0629	3.8035	4.4951	5.8782
4.0629	3.8035	3.89	3.2849	4.7544					1.556	3.8035	4.3222	3.7171	3.89
	3.8035	3.89	3.6307	4.0629					1.3831	3.89		3.7171	3.1984
	4.0629	3.7171	3.9764	5.1866					0.0864				3.5442
	4.0629	3.9764	3.5442						2.0747				3.4578
	4.0629								2.9391				3.112
	3.89								1.4695				4.7544
													4.0629
3.8035	3.5442	4.0629	4.7544	4.668					1.556	3.8035	4.3222	3.7171	4.4086
4.1493	4.0629	3.9764	5.2731	5.1002					1.2102	3.8035	4.4951	4.2358	3.9764
3.8035	3.89	3.89	3.5442	4.3222					1.9882	4.0629	3.8035	3.4578	3.3713
4.4086	4.2358	3.7171	3.7171	4.0629					3.0255	4.4086	3.3713	3.5442	4.0629
3.5442	3.8035	4.1493	3.89	3.9764					0.0864	4.3222	3.9764	3.1984	4.1493
3.7171	4.3222	3.7171	3.112	3.9764						4.2358	3.2849	3.8035	4.9273
	3.5442	3.9764	4.0629	5.0138						3.7171	3.89	4.0629	4.2358
	4.1493	4.0629	3.89	3.6307						3.1984	3.8035	3.2849	3.9764
	4.4951	2.7662	3.6307	3.8035						3.8035	3.1984	3.8035	4.2358
		3.6307	3.1984	4.668						3.89	4.1493	3.9764	4.3222
			3.89	5.1866						4.4086	3.9764	3.7171
			4.2358	4.4951						3.4578		3.7171
			4.668
			3.7171						1.9018						4.2358
			3.5442						1.0373						4.0629
									0.0864						3.4578
									0.1729						3.7171
3.5442						4.0629			2.9391						5.446
3.6307						4.0629			1.4695						3.0255
4.0629						4.668			1.7289						3.6307
2.8527						4.3222			0.3458						3.3713
3.6307						5.6189			3.112						4.0629
4.1493						3.9764			0.0864						3.89
3.9764						3.8035			2.5069						3.6307
4.0629						3.89			2.2475						3.89
3.4578						4.0629
3.5442						3.2849
						4.1493
						3.7171
						4.2358
						3.89
						3.3713
						4.2358
						4.2358
						3.8035
						3.6307
