# Supplementary material for: Pathogenic mutations in the chromokinesin KIF22 disrupt anaphase chromosome segregation
Source: eLife journal article supplement (doi:10.7554/elife.78653), 2022-06-22
Supplement: supp [file F4 Anaphase Recongression.xlsx]

## Sheet: Sheet1
Time (Min)	KIF22-GFP																																											KIF22-GFP R149Q
-1	1.2255	0.5805	0.129	0.9674	0.7095	0.258	0.645	0.129	0.516	1.3544	1.0964	0.4515	0.7094	0.3225	0.5804	0.1935	0.0645	0.516	0.9029	0.645	0.903	0.0645	0.129	0.3225	0.7095	1.0964	0.5805	0.5805	0.5805	0.516	0.129	0.1935	0.516	0.774	0.4515	0.7095	0.1935	0.7094	0.774	0.129	0.5805	0.5804	0.645	0.5805	0.6772	0.387	0.6772	0.516	0.3225
0	0.645	0.774	1.8059	1.2899	0.9674	0.774	1.2899	0.129	0.1935	0.7095	1.8059	0.0645	0.516	0.3225	0.7739	0.258	0.645	1.2255	0.8385	0.7095	1.5479	1.032	0.129	0.6449	0.5804	0.4515	0.387	0.7739	0.258	0.5805	0.258	0.258	0.7094	0.9029	0.129	0.8385	0.258	0.8385	0.387	0.9675	1.1609	0.0645	0.774	0.0968	1.2578	0.6772	0.9675	0.387	0.129
1	0.6449	1.2254	5.0308	4.8373	0.516	0.774	6.1918	5.9338	1.1609	1.4834	3.6119	0.774	2.7088	0.8385	2.2574	0.5805	0.7094	1.9994	3.0959	1.1609	4.5793	1.419	0.4515	0.8384	1.6769	5.1598	0.258	4.3858	5.6113	0.258	4.0634	4.0633	0.4515	2.8379	0.4515	2.3219	1.9994	1.161	1.4834	2.9024	4.1923	2.5154	0.129	0.387	6.869	1.6446	1.7415	0.129	1.4834
2	3.9989	2.5799	6.7722	7.8042	0.5805	6.1918	9.4811	9.7391	3.0313	2.1284	5.6113	0.8385	6.0627	5.2888	5.2243	1.5479	1.6124	5.7402	7.6107	3.1604	7.8041	0.774	0.645	0.1935	1.0964	7.5461	0.129	9.0296	7.3526	0.9675	7.2882	8.3846	0.1935	7.1592	1.6769	8.9651	3.6764	1.3545	9.2876	5.5467	6.9657	5.9337	0.1935	0.1935	8.6105	3.7731	0.774	2.9024	1.8059
3	5.4822	6.7077	8.7716	10.707	1.0965	8.7071	12.061	12.513	6.2562	3.6763	9.1586	0.645	7.8687	7.3527	7.7397	0.645	4.3213	7.4817	9.7391	5.9338	10.836	0.5805	3.3539	0.645	6.3207	9.4811	1.161	11.803	10.771	0.5805	9.6746	10.9	7.4172	10.707	6.1918	11.868	6.1272	0.129	10.578	8.4491	9.8036	8.7071	6.1917	0.6773	11.126	4.4504	2.4186	4.2568	4.6438
4	7.4816	8.7716	11.545	12.319	2.2574	10.578	13.415	13.158	8.5136	2.9024	10.449	2.3864	9.9971	9.6101	8.3202	0.5804	6.7077	8.7716	11.61	8.9651	11.352	1.6125	6.1272	0.0645	8.3847	10.578	3.4183	13.48	12.383	0.645	11.352	12.577	9.4165	11.997	9.8036	13.931	8.3846	6.4497	11.674	10.384	11.868	11.094	8.9651	0.4838	10.836	5.6114	2.0318	4.9017	5.6113
5	9.6746	10.126	13.222	13.028	3.1604	12.061	14.447	14.383	10.513	4.3858	11.674	5.8693	11.996	11.481	9.5456	2.9023	8.1266	10.642	13.028	10.965	12.448	4.3214	7.8687	0.7095	10.126	11.352	5.5468	14.77	12.964	1.032	13.157	13.867	11.287	13.028	11.287	14.77	10.513	7.7397	12.642	11.61	12.77	11.61	9.7391	0.6772	10.158	4.2569	5.321	4.6438	5.9337
6	11.352	11.094	14.318	13.673	5.2888	12.448	15.35	14.77	11.352	4.3858	12.448	0.0645	13.093	12.19	11.029	8.4492	8.7716	11.287	13.286	12.384	13.351	6.9657	9.0941	0.3224	11.481	11.997	7.2882	15.737	13.48	0.903	13.931	14.512	12.513	14.254	12.255	15.479	12.513	8.6426	13.544	13.028	13.738	13.544	9.9325	0.8706	8.3202	3.4829	7.5462	3.7408	5.0307
7	12.19	11.029	15.028	14.705	5.7403	12.899	16.189	16.253	12.319	3.2249	12.9	5.2243	13.738	12.577	12.19	9.5456	9.4166	12.255	14.125	13.029	13.867	6.2563	9.6746	0.258	12.513	11.996	8.0622	16.253	13.802	0.645	14.383	15.028	12.899	15.221	13.093	16.124	13.996	9.2876	13.609	12.899	13.996	14.834	10.513	0.2903	5.708	2.0316	7.9332	2.3864	3.9988
8	13.415	10.32	14.512	14.705	6.3852	13.802	16.447	16.705	13.157	3.6119	13.544	0.774	14.77	13.544	12.641	10.513	9.9971	13.157	15.221	13.738	14.512	7.9331	10.9	0.258	13.222	12.19	8.4491	17.156	14.06	0.774	14.705	15.608	13.093	15.479	13.867	16.576	14.318	9.4166	14.318	13.351	14.834	15.737	11.029	0.5805	4.0634	2.2252	6.1917	1.7415	2.7734
9	14.383	10.191	14.254	15.157	5.8047	14.383	16.963	17.35	13.996	3.2249	13.996	1.032	15.092	14.189	12.641	11.029	10.191	13.738	15.479	14.447	14.834	7.9976	11.868	0.129	13.931	11.545	8.4492	17.672	14.834	0.7095	15.028	16.189	13.609	15.673	14.254	16.834	15.028	9.4811	14.641	13.286	15.092	16.06	11.61	1.1609	5.4177	1.5479	4.3535	1.29	2.7088
10	15.673	10.771	15.157	15.028	6.5787	14.512	17.285	18.059	14.834	3.2249	14.383	0.7095	15.544	14.641	13.093	11.158	10.126	13.996	16.06	15.092	15.415	8.0621	12.448	0.5159	13.802	12.255	8.3846	16.898	15.286	0.5805	15.157	16.64	13.738	16.447	14.834	17.414	15.673	9.4811	15.028	13.738	15.028	16.834	10.707	0.1935	8.2235	1.9349	3.7731	1.29	2.0639
11	16.189	11.029	15.931	15.608	6.7722	15.157	17.285	18.704	14.963	3.4829	15.157	2.4509	16.318	15.028	12.964	11.481	10.384	14.125	16.253	16.06	15.286	7.8686	12.964	0.774	14.383	12.255	8.1912	16.382	15.028	0.387	15.673	17.995	14.189	16.382	15.286	15.737	15.866	9.3521	14.77	14.447	14.963	17.221	10.255	0.0967	10.352	3.7731	3.6764	1.2255	2.3219
12	16.64	11.739	16.511	15.802	6.3852	15.415	17.414	18.833	14.641	2.9669	15.866	2.7734	16.576	15.415	12.771	11.868	10.965	13.544	16.253	16.576	14.705	8.1911	13.286	0.645	14.899	12.964	7.8042	16.576	14.189	0.258	15.415	17.995	14.641	16.705	15.737	15.802	15.544	10.062	14.899	14.383	14.189	16.576	10.771	2.3219	13.448	2.9991	4.934	1.161	2.5154
13	16.64	11.61	16.834	15.802	6.5787	15.995	17.995	19.027	14.512	2.9024	16.253	2.5799	15.866	15.544	12.513	11.997	11.674	13.544	16.189	17.027	13.802	8.3846	13.415	0.4514	14.318	13.157	6.7077	19.736	14.899	0.3225	14.77	17.93	15.157	16.705	15.737	15.479	14.576	9.5456	14.383	14.189	15.221	16.06	10.32	2.0318	12.19	4.3535	5.9984	1.0964	2.9024
14	16.06	12.319	17.285	15.221	6.4497	16.963	17.995	18.446	14.899	2.4509	16.447	3.4828	17.285	16.06	11.739	12.384	11.674	12.642	15.995	17.027	13.609	7.9331	13.222	0.8385	14.705	13.351	8.0622	19.285	16.318	0.7094	14.641	17.995	15.608	17.027	16.318	15.931	13.48	9.6745	15.931	14.189	14.834	16.382	11.029	1.548	11.126	4.3535	8.5136	2.3864	3.8053
15	15.415	11.803	18.962	15.544	6.5142	16.963	18.059	18.059	15.028	2.1929	16.318	5.4177	17.801	16.124	12.255	11.867	11.997	12.706	16.189	16.963	14.447	7.4171	13.673	0.4515	14.641	14.125	8.1266	18.64	15.673	1.0965	14.318	19.027	15.931	16.898	16.124	15.608	13.157	9.3521	15.737	14.705	15.35	17.479	10.384	2.6121	11.223	5.4179	11.706	2.1284	5.6758
[truncated: 97 more columns]
