# Supplementary material for: Pathogenic mutations in the chromokinesin KIF22 disrupt anaphase chromosome segregation
Source: eLife journal article supplement (doi:10.7554/elife.78653), 2022-06-22
Supplement: supp [file F4 Cytokinesis Failure.xlsx]

## Sheet: Sheet1
Number of Divisions
	2 Daughter Cells, Normal Nuclear Morphology	2 Daughter Cells, Nuclear Morphology Defect	1 Daughter Cell, Normal Nuclear Morphology	1 Daughter Cell, Nuclear Morphology Defect
KIF22-GFP	62	2	5	1
KIF22-GFP R149Q	24	20	1	21
KIF22-GFP V475G	21	22	0	15
Distance Between Chromosome Masses
KIF22-GFP	KIF22-GFP R149Q	KIF22-GFP V475G
8.473	2.913	1.676
11.941	0.987	1.638
8.39	3.98	5.821
5.173	1.29	0.454
9.352	1.435	2.579
9.793	1.423	5.119
9.119	2.559	3.387
12.343	0.97	1.325
11.9	2.218	2.176
7.046	3.56	6.872
4.771	2.045	3.449
10.565	2.259	2.677
8.381	1.795	1.727
5.078	2.161	3.067
6.768	1.515	6.322
9.356	2.359	2.962
11.026	2.269	5.464
11.92	4.857	8.859
13.439	2.745	5.291
6.547	5.611	4.054
12.315	1.931	5.483
7.59	1.869	6.977
7.97	1.581	3.222
4.407	1.572	6.384
8.533	2.5	4.868
7.943	1.533	5.685
4.5	4.12	5.68
2.97	4.193	1.843
5.852	7.723	7.386
4.427	5.692	2.793
4.65	6.564	2.185
2.032	5.847	6.536
5.646	7.259	2.703
4.075	1.592	3.229
5.148	10.99	9.665
7.543	7.589	6.325
7.724	9.769	6.964
5.642	4.789	7.62
7.712	5.553	10.196
6.367	3.612	5.356
7.442	5.802	9.546
5.406	4.855	6.97
4.819	2.416	4.329
7.797	3.417	6.261
8.804	2.858	5.185
7.768	2.184	6.286
8.549	6.772	4.396
8.834	6.371	5.558
6.682	10.638	6.772
10.205	9.285	4.071
10.96	7.935	2.312
14.314	10.849	8.144
8.636		9.992
5.976		6.257
9.388		8.33
9.5
5.091
12.948
10.389
6.047
9.552
10.613
