# Supplementary material for: Pathogenic mutations in the chromokinesin KIF22 disrupt anaphase chromosome segregation
Source: eLife journal article supplement (doi:10.7554/elife.78653), 2022-06-22
Supplement: supp [file F4 FS1 Anaphase Recongression RPE1.xlsx]

## Sheet: Sheet1
Minutes After Anaphase Onset	KIF22-GFP																									KIF22-GFP R149Q
-1	0.3225	0.7739	0.516	0.4515	0.0645	0.387	0.645	0.5805	0.3225	0.258	0.129	0.2579	1.032	1.0319	0.4515	0.1935	0.9029	0.774	0.774	0.0645	1.0964	0.9029	0.4515	0.516	0.1935	0.903	0.387	1.1609	0.6449	0.258	0.258	0.129	0.129	0.1935	0.645	0.4515	0.4515	0.387	0.1935	0.516	0.645
0	0.7094	0.645	0.258	0.5804	0.8385	0.7095	0.4515	0.4515	0.129	0.129	0.387	0.516	0.3225	0.1935	0.0645	0.8385	1.0319	0.9674	1.7414	1.6125	0.5805	0.8384	0.0645	0.516	1.8059	0.9675	0.129	0.7739	0.5804	1.2255	1.4189	0.4515	0.645	0.129	1.2255	1.1609	0.129	1.2255	0.5805	1.032	0.8385
1	0.0645	1.161	0.5805	0.6449	0.5805	0.0644	5.6112	2.8379	0.0645	0.8385	0.258	0.3225	0.7095	0.9674	0.3224	0.0645	3.8053	0.3224	1.419	1.2254	3.8698	1.3544	0.258	0.516	5.3532	0.1935	0.645	0.645	1.2899	0.8385	5.9337	1.29	0.0645	0.387	0.516	0.774	0.516	0.129	0.645	4.2568	0.645
2	0.7095	6.7722	5.4177	0.9029	0.774	1.032	8.8361	7.0947	0.4515	1.0965	0.774	0.8385	0.903	0.3225	0.9029	0.8385	8.3847	1.4834	0.645	6.1918	8.3846	0.774	0.387	0.4515	7.6106	0.516	1.2899	0.8384	0.774	0.645	7.3527	6.7077	0.1935	0.4515	0.258	7.2236	0.645	4.2568	0.3225	8.5782	0.645
3	0.5805	10.4486	9.223	0.387	1.0964	0.1935	12.319	10.4485	0.258	1.0965	0.4515	0.258	1.032	0.903	0.3225	0.7739	12.0609	0.258	1.0965	10.0615	10.513	1.3545	0.516	0.5804	8.9006	0.5159	2.5154	0.903	1.6769	0.129	5.5468	8.1267	0.3869	0.7739	0.516	9.0296	0.516	1.6769	0.7095	9.1586	5.9982
4	0.7094	12.771	12.384	0.4515	1.3545	1.4834	14.06	12.642	0.3225	0.645	0.516	0.129	0.903	0.0645	0.0645	0.1935	14.125	11.158	10.965	12.254	12.835	0.7095	0.129	0.8384	10.384	1.6124	4.9018	1.0964	0.903	0.7095	1.5479	8.3846	1.9349	1.2254	0.645	8.8361	3.6763	0.1935	0.516	9.0941	6.8367
5	11.481	14.318	13.867	2.1929	1.3545	4.7728	15.35	15.221	0.0645	0.258	0.645	0.9029	0.9674	9.1586	0.7095	4.7083	15.157	12.319	11.738	13.093	14.06	0.387	0.4515	0.258	10.836	3.6119	5.8047	1.9994	0.4515	0.774	0.2579	7.5462	5.6757	0.4515	0.7094	7.4817	6.5787	0.8384	0.0645	8.3847	7.2237
6	12.577	15.866	15.028	2.4509	2.3219	6.3852	15.479	15.415	0.5805	0.9674	1.6124	0.4514	1.5479	9.7391	1.161	4.9663	15.802	13.028	11.287	13.931	15.286	1.2255	0.903	0.387	11.868	4.8373	5.9982	2.4509	0.4514	0.516	0.129	5.6758	8.5136	0.4515	0.7739	6.0627	6.7077	0.645	0.2579	7.2882	6.4497
7	12.77	15.866	15.415	3.0959	2.8378	7.3526	15.673	15.479	1.4835	1.806	4.6438	2.2574	1.032	10.578	0.129	9.739	15.737	13.802	11.739	14.318	15.415	0.8384	4.5793	0.774	12.641	0.7094	6.1917	2.0639	0.7095	0.1935	1.2254	6.3853	9.4811	1.0964	0.645	6.1272	7.0946	0.3225	0.4515	6.7077	5.7402
8	13.028	15.544	15.673	3.5473	3.4184	7.0947	16.189	14.576	7.0302	3.8699	4.6438	5.4822	3.8054	11.029	3.0313	9.868	15.802	14.318	11.996	14.383	15.995	3.9988	5.7403	4.1278	13.222	0.387	7.3527	3.8053	0.5805	0.129	5.0953	6.5787	9.6101	3.3539	1.2254	8.1911	7.7397	1.6769	0.645	5.9338	6.3852
9	11.803	16.447	16.06	3.7408	3.2893	7.9977	16.06	14.77	7.5462	5.0952	5.8047	6.3207	4.4503	11.158	5.1597	10.642	17.027	14.705	11.739	14.125	15.479	5.0953	6.2563	5.1598	13.802	0.8384	7.9331	8.0622	0.258	0.4514	6.2562	10.836	9.3521	3.4183	0.645	9.2876	8.3201	4.9018	0.5805	6.1272	5.1598
10	13.738	17.543	16.253	4.1278	3.6763	8.0621	16.898	16.06	7.3527	5.0952	5.7403	6.1917	4.3859	10.707	5.7403	9.997	17.027	14.383	11.029	14.189	15.737	5.8047	6.3207	5.6758	13.673	1.3545	6.1918	7.9976	0.516	0.258	7.4171	11.674	9.4811	2.4509	0.516	8.5136	7.8041	4.7728	1.419	5.7403	4.4503
11	14.189	18.446	16.318	3.9989	5.1597	8.9006	16.705	16.769	7.6751	5.2243	5.8693	6.5143	1.4834	10.384	6.5787	9.997	17.866	13.867	10.513	13.802	15.544	7.0947	6.9012	5.3533	13.222	3.3539	6.3207	8.5782	2.2574	0.9674	8.3846	9.6101	10.062	2.9024	1.9994	9.5456	7.8041	5.7403	4.3213	4.9663	5.0953
12	12.512	18.769	15.995	5.1598	5.3533	10.191	16.963	17.93	6.3853	5.4178	5.7403	6.8367	4.9017	10.32	6.8367	9.0941	17.737	12.899	10.062	13.996	15.931	7.3527	5.7403	5.5468	12.899	3.0959	6.1917	6.7722	2.2574	2.3219	6.7077	9.2231	9.8036	4.5793	1.419	9.352	6.1272	6.7077	4.7728	5.3532	6.5142
13	13.673	19.091	16.447	5.1597	5.5468	11.61	16.318	18.446	5.8692	5.8048	5.4822	5.7402	4.9663	10.707	6.9012	7.0302	17.995	13.028	9.4166	14.06	15.673	6.8367	5.8047	5.9982	13.222	4.1278	6.7077	8.1912	4.3858	2.0639	7.0302	11.739	11.029	5.2887	5.4822	11.867	6.7722	6.7722	5.3533	5.7402	4.8373
14	13.351	19.478	16.963	4.9663	5.6758	5.0308	16.447	19.349	6.0628	6.9657	5.5468	5.6758	4.7728	10.191	6.5142	4.9663	19.478	13.157	10.062	13.738	15.286	6.8367	6.0628	5.7403	12.254	4.4503	6.6432	6.6432	5.8692	3.8053	7.1591	12.512	10.9	5.6113	4.9663	11.803	6.5142	6.9012	5.4178	5.5468	7.6752
15	13.093	19.801	16.963	4.1278	5.9338	11.352	18.446	18.64	6.1273	6.6432	5.3533	6.3207	4.5148	9.6101	7.6751	6.5142	19.091	13.48	10.32	14.189	14.899	6.9012	5.1598	6.3207	13.028	5.6757	7.9332	8.2556	6.7722	3.3538	7.2882	11.61	10.836	3.5474	4.9663	12.771	6.6432	3.3538	5.7403	5.4178	7.6107
