# Supplementary material for: Pathogenic mutations in the chromokinesin KIF22 disrupt anaphase chromosome segregation
Source: eLife journal article supplement (doi:10.7554/elife.78653), 2022-06-22
Supplement: supp [file F5 Anaphase Poles Centromeres.xlsx]

## Sheet: Sheet1
Distance Between Centromeres
Time (Minutes)	KIF22-GFP												KIF22-GFP R149Q												KIF22-GFP V475G
-0.333333	1.885	0.195	0.26	0.65	0.39	0.975	0.39	0.845	0.26				0.65	1.3	1.17	0.715	0.325	0.26	0.39	1.43					0.13	0.91	0.975	1.04	0.195	0.065	0.065	1.105	0.13	0.845	0.52	0.455
0	2.145	1.885	0.195	0.845	1.04	0.52	0.975	0.715	0.975				0.715	0.26	1.3	0.39	0.715	0.39	0.39	1.82					0.975	0.845	2.08	1.04	0.26	1.43	0.065	1.3	0.52	1.43	0.26	0.39
0.333333	3.575	3.77	0.39	0.91	0.715	0.325	2.015	0.455	0.52				0.715	1.495	1.17	1.755	2.015	2.34	0.78	2.665					2.015	2.405	3.77	1.885	0.845	2.08	0.065	1.3	2.405	2.275	0.78	0.325
0.666667	3.835	5.33	0.195	0.975	0.715	0.91	3.38	0.195	0.585				1.495	3.705	1.235	3.965	3.055	3.315	1.43	2.99					3.705	2.795	4.875	2.47	2.47	3.12	0.13	3.25	3.77	2.6	1.495	0.065
1	4.68	4.55	1.56	2.665	1.17	1.3	4.355	0.26	2.08				2.925	4.29	2.275	4.875	3.9	3.9	1.95	3.835					4.615	3.965	5.33	3.64	3.64	4.16	3.51	3.575	4.81	3.705	1.625	0.78
1.33333	5.005	6.37	3.055	3.315	2.6	2.535	5.85	0.13	2.405				3.575	4.81	2.73	5.98	5.33	5.395	3.055	3.835					4.745	3.835	6.045	5.785	4.485	5.07	4.16	4.29	5.525	4.095	2.535	2.08
1.66667	4.94	6.045	4.42	3.25	2.86	2.73	8.06	2.34	2.6				3.77	4.94	4.16	6.63	6.045	5.85	4.485	4.615					4.55	5.33	6.11	6.37	5.59	5.135	4.875	4.485	6.37	5.135	2.925	4.095
2	5.005	6.825	5.785	4.03	2.925	3.64	6.175	4.03	3.835				4.355	5.33	4.485	7.41	6.11	5.98	4.81	4.485					5.655	5.46	7.02	5.525	6.955	6.37	4.615	4.875	7.41	5.005	4.03	4.225
2.33333	4.875	7.995	6.63	5.33	5.46	3.77	6.76	5.72	4.745				5.005	4.42	4.81	7.735	6.37	7.67	5.265	4.81					6.11	6.24	6.955	6.695	7.28	7.67	5.005	5.265	8.775	5.005	4.68	5.2
2.66667	7.28	8.71	7.085	4.29	5.46	5.33	7.735	4.55	4.875				5.2	6.37	5.655	9.23	6.695	7.995	7.54	5.59					7.02	5.915	7.8	8.255	7.41	8.45	5.07	6.045	9.165	5.72	3.965	5.265
3	6.63	10.075	7.41	4.68	4.875	5.525	7.15	5.915	5.46				5.785	6.5	6.37	9.035	7.02	8.32	5.655	5.265					7.67	4.81	8.45	6.565	7.735	8.775	5.46	6.175	10.01	5.98	4.355	5.265
3.33333	6.76	9.815	8.45	5.46	6.76	6.305	9.23	5.395	5.785				5.98	6.825	5.98	9.36	7.995	9.165	5.98	4.81					7.605	5.395	8.71	7.67	8.125	8.775	5.915	5.915	10.92	5.785	3.77	6.045
3.66667	7.605	10.205	8.71	4.875	7.28	6.565	9.36	6.175	6.175				5.525	6.76	6.89	9.49	7.995	9.1	6.11	5.2					7.345	5.59	9.035	7.865	8.58	7.735	6.305	6.5	11.31	6.565	4.875	6.305
4	8.645	11.05	10.27	4.615	8.71	8.32	9.685	7.67	6.305				6.565	7.67	6.63	10.4	8.97	9.685	6.305	5.33					8.19	6.24	9.75	8.255	9.23	8.385	5.59	6.76	11.505	6.63	5.005	7.41
4.33333	9.035	11.245	11.18	6.11	6.695	8.06	9.88	7.67	7.15				5.59	7.28	7.41	10.725	9.295	9.685	6.045	5.135					9.035	6.24	10.205	8.775	9.425	8.775	6.63	6.825	11.96	6.565	5.265	7.41
4.66667	9.425	11.83	11.895	5.915	8.255	7.995	11.44	8.45	6.76				7.02	7.605	7.93	11.05	9.815	10.855	6.955	6.5					9.555	6.11	10.205	10.01	9.295	8.84	7.215	7.28	11.44	6.435	5.265	7.735
5	9.88	11.57	12.675	6.5	10.79	8.71	11.115	8.255	7.41				6.89	7.475	8.45	10.985	9.49	10.53	6.695	6.695					9.49	6.5	10.53	9.88	9.88	7.41	7.345	7.475	12.22	7.67	5.72	9.425
5.33333	9.36	12.48	12.09	6.89	9.88	8.19	12.025	9.49	9.23				6.89	8.19	8.775	10.92	9.815	10.725	6.37	6.565					9.685	6.89	10.595	10.14	10.335	9.295	7.54	7.15	12.35	7.085	6.11	8.905
5.66667	11.05	11.83	13.39	7.605	10.27	8.58	12.415	9.88	8.645				6.305	7.735	8.71	11.7	9.1	11.115	6.37	5.395					9.685	6.695	10.92	10.4	9.23	7.345	6.89	7.28	12.545	7.15	5.46	9.815
6	11.765	13.065	13.52	7.8	11.245	9.425	12.935	10.14	8.905				7.085	7.54	8.775	12.285	8.905	10.985	5.85	5.2					10.075	6.89	11.05	10.14	9.815	8.905	6.435	7.475	12.935	6.695	5.655	9.945
6.33333	12.025	12.61	14.105	7.15	11.7	9.49	13.065	10.4	9.035				6.37	7.345	8.58	11.57	9.555	10.53	6.565	5.785					9.945	7.28	11.18	10.01	9.165	9.1	7.215	7.345	12.87	6.76	5.85	10.01
6.66667	11.115	14.3	13.715	7.475	12.285	10.66	13.52	10.595	9.36				6.24	7.215	8.905	10.14	9.165	10.075	6.175	5.525					10.27	6.955	11.18	9.62	9.1	8.645	7.02	7.8	13.13	7.605	5.59	10.205
7	11.44	14.3	14.365	8.385	12.22	11.245	13.585	11.505	9.62				6.5	7.28	9.425	10.465	8.97	9.815	6.435	5.655					10.14	7.215	11.505	9.165	8.97	8.58	7.28	8.125	13.78	7.215	5.72	10.66
7.33333	13.195	14.69	14.56	9.36	12.87	12.48	13.455	11.375	9.685				6.24	6.695	9.49	10.01	9.23	9.295	5.525	5.395					10.14	6.955	11.765	9.295	9.425	8.45	7.28	8.125	13.91	8.45	6.435	9.815
7.66667	12.74	14.755	14.82	8.45	12.805	12.415	13.78	12.61	10.4				5.59	6.305	9.49	10.335	9.295	9.035	5.655	4.745					10.14	6.825	11.7	9.035	9.555	8.255	7.865	8.19	14.365	7.735	5.59	10.27
8	13.065	15.08	15.34	9.295	13.91	12.805	15.015	12.025	10.075				5.46	6.24	9.035	9.815	8.84	8.84	5.135	4.03					10.14	7.28	11.7	9.36	9.555	8.19	7.345	7.8	14.04	7.085	6.305	10.335
8.33333	13.26	15.015	15.34	10.27	13.39	11.83	15.21	12.74	10.985				4.94	7.28	7.15	9.165	8.775	8.385	4.94	3.77					10.53	6.76	11.83	9.555	9.1	7.735	7.28	7.995	14.625	7.605	5.85	11.31
8.66667	13.585	14.82	14.625	10.075	14.365	12.48	15.795	13.585	9.75				4.355	5.655	7.15	8.905	8.775	9.035	3.77	4.29					10.465	7.8	11.895	8.97	10.4	7.8	7.28	7.8	14.56	7.67	6.305	11.245
9	14.04	14.755	15.015	10.14	13.975	11.83	16.51	13.455	11.245				3.835	4.94	7.67	8.775	8.19	7.605	3.445	3.38					10.335	6.175	11.96	8.905	10.14	7.995	7.475	8.385	14.82	7.605	6.76	10.92
9.33333	14.04	14.885	15.145	10.595	15.145	12.675	15.795	13.13	11.505				4.485	4.355	7.67	9.36	7.8	6.695	4.16	3.575					10.595	6.37	12.155	8.775	10.14	7.54	8.255	7.345	15.275	7.345	6.5	10.985
9.66667	13.975	14.69	15.535	10.855	14.885	13.195	16.25	13.52	10.985				3.315	5.005	7.15	10.14	7.28	8.645	4.03	3.705					10.595	7.54	12.35	8.84	10.27	8.06	6.695	7.67	15.665	7.15	6.76	10.075
10	13.65	15.34	15.665	10.79	15.015	14.235	16.185	14.365	11.895				2.86	4.225	7.02	8.775	7.475	8.58	3.9	3.705					10.985	7.02	12.09	9.035	10.79	7.41	7.8	7.67	15.73	7.15	7.15	10.205
10.3333	14.56	15.47	16.055	11.115	15.405	12.61	16.25	12.285	11.635				2.925	4.16	6.89	9.88	10.465	8.775	3.965	3.835					10.79	7.41	12.025	8.58	10.01	6.825	7.995	7.41	15.6	6.435	6.305	11.31
10.6667	14.495	15.6	15.73	11.57	15.34	12.805	15.73	13	13.39				3.315	4.03	5.005	9.23	7.345	8.45	3.835	3.705					11.18	5.59	13.065	8.97	10.465	7.54	9.035	7.085	15.34	7.41	7.215	11.115
11	14.3	16.25	16.835	12.545	15.275	12.61	16.64	13	13.13				2.665	3.64	6.175	9.945	8.32	9.23	4.03	3.705					11.05	7.605	12.675	8.97	11.765	7.215	8.385	7.15	15.86	7.475	6.76	11.505
11.3333	14.625	16.185	16.51	11.57	15.6	13.195	16.315	13.13	11.895				3.12	3.965	5.005	9.945	8.385	9.1	3.965	3.64					10.985	6.11	13.52	8.905	11.31	7.865	9.1	6.76	16.25	7.02	7.28	11.635
11.6667	14.235	16.38	16.315	12.09	15.6	13	18.135	13.065	12.61				2.47	4.16	5.005	9.49	7.345	8.905	4.03	3.64					11.31	7.67	13	9.23	12.155	8.06	9.23	6.63	16.51	6.37	8.775	11.31
12	14.495	16.51	16.38		15.535	13.065	17.095	14.365	12.415				2.47	3.185	6.955	10.4	8.645	9.49	4.03	4.29					11.18	7.215	13.39	8.84	12.09	9.62	10.14	6.565	16.705	6.565	8.45	10.14
12.3333	14.3	16.25	16.38		15.795	13.65	17.81	12.61	13.065				3.055	3.51	5.525	11.7	8.71	10.27	4.355	3.835					11.44	7.41	13.26	9.23	12.415	10.075	9.685	6.695		8.385	7.735	10.4
12.6667	14.365	16.445	16.835		15.275	15.99	17.615	14.235	12.35				2.86	2.34	6.305	12.48	9.165	10.79	4.55	3.575					12.155	8.32	13.975	9.62	13	8.06	9.165	6.695		7.345	7.735	10.075
13	13.78	16.64	17.745		15.08	15.86	17.81	15.925	12.675				2.665	3.12	6.695	11.765	9.035	10.595	4.745	4.03					11.44	7.8	14.755	9.685	13.26	8.255	9.23			8.06	9.49	10.985
13.3333	13.845	16.77	16.965		14.82	15.795	17.94		11.635				2.405	1.885	7.8	12.285	8.84	12.935	5.07	3.77					11.895	8.06	14.3	9.88	13.585	9.295	9.425			7.67	10.4	10.92
13.6667	13.52	16.9	18.135		16.055	16.185	17.94		12.415				2.275	3.445	6.305	12.22	8.97	11.57	4.42	2.925					11.505	9.295	14.56	10.075	13.39	9.36	9.1			10.075	7.15	10.66
14	14.04	17.225	18.265		14.56	16.705	18.265		12.025				3.12	3.445	7.54	13.195	9.815	11.895	5.005	3.25					11.895	8.255	15.34	10.205	13.78	9.555	9.815			10.855	8.645	10.205
14.3333	13.455	16.77	18.005		15.99	15.535	18.2		12.415				2.47	3.055	7.02	12.675	10.855	12.35	5.2	3.12					12.48	8.905	14.885	10.53	14.3	10.01	8.97			11.44	9.555	10.595
14.6667	13.585	17.745	18.395		16.315	16.185	18.07		12.805				2.6	3.185	7.865	13.455	10.595	10.92	5.33	3.77					12.415	9.555	15.08	10.27	14.365	10.075	10.01			8.58	9.36	10.53
15	13.975	17.355	18.33		16.25	15.99	17.615		13.65				2.6	3.055	7.15	13.325	10.985	11.505	5.2	4.42					12.22	8.905	14.365	10.53	13.845	10.335	10.725			8.06	8.84	10.79
Distance Between Chromosomes
Time (Minutes)	KIF22-GFP												KIF22-GFP R149Q												KIF22-GFP V475G
-0.333333	0.65	0.195	0.26	0.52	0.195	0.325	0.13	0.715	0.455				0.585	0.65	1.43	0.65	0.39	0.13	0.325	0.39					0.715	1.04	0.195	1.04	0.13	0.39	0.195	0.715	0.325	0.715	0.13	0.39
0	1.04	0.13	0.455	0.13	0.585	0.26	0.52	0.585	0.715				0.715	0.78	1.56	0.52	0.585	0.325	0.39	0.065					0.78	0.39	0.455	0.975	0.65	0.65	0.325	1.17	0.325	0.78	0.455	0.325
0.333333	1.95	0.715	0.26	0.26	0.39	0.13	0.715	0.52	0.39				0.65	0.91	1.04	0.325	1.3	0.195	0.715	0.13					0.78	1.235	1.755	0.845	0.195	0.39	0.325	1.235	0.715	0.78	0.39	0.195
0.666667	1.95	3.055	0.195	0.39	0.39	0.52	2.015	0.26	0.39				1.17	1.755	1.17	2.795	1.56	1.105	0.715	0.39					1.105	1.04	2.405	1.3	0.455	0.455	0.26	0.78	1.56	0.78	0.845	0.26
1	2.6	3.38	0.325	0.91	0.065	0.39	3.12	0.325	0.455				1.365	2.86	0.585	2.925	2.405	2.73	0.455	0.26					0.715	1.82	3.12	1.82	0.975	1.95	0.78	0.195	1.625	0.065	0.39	0.39
1.33333	2.99	3.38	1.3	0.975	0.13	0.195	3.51	0.325	0.455				1.625	3.315	0.91	4.55	3.835	3.185	0.715	0.325					1.04	1.3	2.99	2.275	1.365	2.6	0.715	0.455	3.38	0.065	0.195	0.715
1.66667	2.73	4.355	2.925	1.885	0.325	0.065	5.46	0.39	0.455				2.275	3.9	1.82	5.135	4.355	4.16	2.08	0.195					0.13	2.47	3.705	3.315	3.185	3.705	2.145	3.12	4.225	2.47	0.585	0.13
2	1.365	4.68	3.9	1.04	0.39	0.585	5.85	0.39	0.975				2.275	3.9	2.275	5.915	4.225	4.355	2.73	0.39					1.755	2.275	3.315	4.03	2.21	4.485	3.315	3.315	5.46	2.34	0.26	0.195
2.33333	2.145	4.94	4.68	1.43	1.495	1.885	5.395	0.52	0.975				3.055	4.095	2.6	6.76	5.525	5.525	2.99	0.325					0.65	2.47	3.9	4.68	4.55	5.265	3.965	1.04	6.695	2.47	0.065	0.325
2.66667	4.16	6.63	5.07	1.625	1.625	2.21	7.15	1.43	2.6				3.38	5.135	4.095	6.825	6.045	6.305	2.795	0.845					0.65	2.405	5.33	5.135	5.785	5.33	4.42	3.12	6.955	3.25	0.65	0.65
3	4.355	8.125	5.525	1.625	2.21	3.445	7.8	2.275	3.445				3.315	5.525	4.225	7.67	6.89	6.89	2.795	0.13					0.455	1.95	5.395	5.785	6.11	6.24	3.445	3.575	8.19	1.235	0.975	0.39
3.33333	5.395	7.8	6.76	2.405	4.095	3.705	8.06	2.145	3.835				3.705	5.59	4.68	8.32	7.28	7.995	3.185	0.065					1.82	1.69	5.98	6.63	6.37	6.37	3.965	4.745	9.1	3.25	0.845	1.04
3.66667	5.655	9.1	7.8	3.9	5.85	4.94	8.255	2.015	3.575				4.745	6.175	5.525	8.775	7.67	7.67	3.445	0.715					0.585	2.535	6.695	6.24	6.695	6.565	4.225	4.68	9.295	4.095	1.235	1.365
4	5.85	10.14	10.01	4.55	6.565	5.655	9.555	3.185	3.835				4.68	6.175	5.005	9.1	8.125	8.97	2.99	0.78					0.13	3.12	7.605	7.735	6.825	6.825	4.485	5.46	10.14	3.77	0.195	1.04
4.33333	7.345	10.465	9.945	5.135	7.345	6.11	9.75	2.795	4.81				4.81	6.565	6.955	10.205	8.385	9.1	4.55	0.975					4.875	2.665	7.8	7.735	7.54	6.63	4.875	5.135	10.205	4.615	0.13	1.17
4.66667	7.8	10.725	11.31	5.915	8.19	7.02	10.335	6.045	4.875				5.33	6.565	6.695	9.62	8.45	8.97	4.745	0.78					5.85	2.34	8.385	8.775	7.475	6.305	5.525	5.59	10.595	5.525	0.195	0.91
5	8.385	11.18	11.44	6.5	8.71	7.02	10.335	7.215	5.2				5.46	6.76	7.8	10.335	8.45	9.49	3.9	1.365					6.305	3.835	8.32	8.71	7.41	6.63	5.785	5.525	11.245	5.46	0.065	4.81
5.33333	8.905	11.05	11.96	6.37	9.555	7.54	11.18	7.345	6.435				5.59	6.565	7.54	10.595	8.515	10.075	5.07	2.925					6.825	5.72	8.84	8.775	7.735	6.825	6.045	5.915	11.505	5.33	1.56	6.37
5.66667	9.555	11.895	12.415	7.02	10.27	7.605	11.31	8.32	7.02				5.59	6.565	7.8	10.14	8.515	9.685	6.11	2.99					7.215	5.395	9.165	8.775	7.8	6.5	6.045	5.98	11.57	4.875	1.69	6.825
6	10.595	12.415	12.805	7.345	10.595	8.255	12.025	8.71	7.345				5.135	6.435	8.06	10.53	8.645	9.165	3.705	2.86					7.345	5.265	9.685	9.1	7.8	6.76	5.98	6.305	11.895	4.875	1.82	7.735
6.33333	10.92	12.74	13.325	7.54	10.725	8.45	12.025	9.36	8.06				5.46	6.24	7.93	10.075	8.385	9.685	4.095	2.405					7.8	5.33	9.62	9.035	7.67	6.63	6.175	6.565	12.025	5.46	1.755	7.93
6.66667	10.985	12.74	13.065	7.605	12.09	8.71	12.48	9.945	8.58				5.005	6.175	7.28	9.75	8.71	9.555	4.615	2.535					8.32	5.135	10.27	9.1	7.735	6.76	5.655	6.695	12.22	4.615	1.69	8.255
7	11.57	12.87	13.91	8.45	12.415	9.23	13.13	10.66	8.32				4.485	5.98	6.955	9.295	8.515	9.035	4.29	2.535					8.645	5.46	10.335	8.645	7.8	6.565	6.045	6.76	12.415	4.615	0.91	8.905
7.33333	11.635	13.715	13.585	8.84	13.13	9.62	13.65	11.05	8.97				5.005	6.045	7.085	8.905	8.255	8.515	3.77	1.95					8.32	4.42	10.465	8.645	7.605	6.89	6.045	6.5	12.675	4.615	1.235	9.165
7.66667	11.895	13.715	14.625	9.1	12.74	10.14	13.91	11.57	10.01				4.03	5.265	6.955	8.645	7.995	8.385	3.38	0.195					8.125	5.07	10.855	8.58	7.93	6.24	5.915	6.37	12.805	4.875	0.78	9.035
8	12.35	13.78	14.365	9.62	13.52	10.27	14.495	11.7	9.685				3.705	4.81	6.5	8.19	7.54	7.15	2.73	0.26					8.905	5.07	10.79	8.775	7.8	5.395	5.785	6.175	12.805	5.135	0.715	9.295
8.33333	12.61	14.04	14.3	10.335	13.52	10.335	14.56	12.35	9.75				3.64	4.095	5.525	7.475	7.475	6.045	2.47	0.845					8.97	5.07	10.595	8.71	8.58	6.24	5.915	6.37	12.935	4.81	0.845	9.555
8.66667	12.415	14.495	14.755	10.27	13.52	10.79	15.08	12.805	9.75				3.315	3.705	5.395	6.76	6.825	6.435	1.95	0.845					9.035	5.72	10.985	8.45	8.255	6.305	5.98	6.76	13.65	4.745	0.65	8.97
9	12.935	14.495	14.69	10.985	13.975	11.05	15.405	13.065	10.4				2.86	3.315	4.485	6.695	6.5	6.24	1.69	0.065					9.1	4.875	10.725	8.515	8.515	6.435	5.525	6.37	13.52	4.03	0.715	9.1
9.33333	13.325	14.885	14.885	11.245	14.04	10.855	15.6	13.455	10.465				2.535	2.925	4.355	6.435	6.175	5.135	0.585	0.585					9.295	4.29	11.05	8.45	8.58	5.655	5.85	6.045	14.3	3.705	0.715	9.035
9.66667	13.26	15.08	15.08	11.31	14.495	11.7	15.405	13.65	10.92				2.535	2.925	4.225	5.785	5.525	4.81	0.455	0.13					9.555	4.94	10.985	8.32	8.97	6.045	5.135	5.915	14.495	4.355	0.715	9.165
10	13.26	15.21	15.47	11.7	13.975	11.765	15.145	12.935	11.05				0.325	2.925	3.77	6.24	5.46	4.29	0.975	0.715					9.23	4.94	11.05	7.93	8.71	6.045	7.215	5.72	14.625	3.38	0.845	9.295
10.3333	13.65	15.47	15.73	12.025	14.04	11.765	15.47	12.675	10.985				0.455	2.73	3.575	6.37	5.135	4.42	0.91	0.13					9.23	4.55	11.505	7.93	8.97	5.785	7.605	5.72	14.82	2.99	0.65	9.23
10.6667	13.975	15.6	15.86	11.505	14.235	11.83	15.34	12.74	11.18				0.26	2.535	4.03	6.045	4.745	4.615	0.78	0.26					9.75	4.55	11.505	8.255	9.685	5.85	7.605	5.525	15.21	3.055	0.975	9.165
11	14.105	15.795	15.99	11.31	14.3	12.74	15.405	12.48	11.18				0.195	2.405	4.16	6.175	4.875	5.785	0.195	0.78					9.88	5.005	11.7	8.125	10.01	5.85	7.865	5.46	15.145	2.73	0.715	9.1
11.3333	14.105	15.99	15.925	11.57	14.17	12.675	15.405	12.35	11.57				0.455	2.015	4.095	6.955	4.745	7.41	0.91	0.26					10.01	5.07	12.415	8.84	10.075	5.915	9.23	5.59	15.145	2.925	1.105	9.035
11.6667	14.17	16.055	16.185	11.44	13.975	13	15.34	12.09	11.96				0.26	2.08	2.535	7.735	5.785	7.54	0.26	0.39					10.27	5.2	12.285	9.1	11.44	5.72	9.555	5.265	15.21	2.925	1.365	9.23
12	13.845	15.99	16.705		13.65	13.13	15.795	12.285	11.83				0.325	0.195	2.795	8.255	5.85	8.255	0.455	0.975					10.075	5.2	12.48	8.775	11.505	5.655	9.685	5.33	14.95	2.925	1.105	9.75
12.3333	14.235	16.315	16.64		13.715	13.52	15.99	11.895	12.09				0.13	0.325	4.42	8.32	6.175	8.71	1.04	0.39					10.27	5.85	12.415	8.905	11.96	5.85	9.62	5.72		3.12	0.975	9.36
12.6667	13.585	16.185	16.64		13.78	13.91	15.795	12.025	11.44				0.195	0.195	4.615	9.49	7.215	9.62	0.65	0.845					10.01	5.85	13.13	8.645	11.83	6.5	9.23	5.46		3.38	0.13	9.36
13	13.65	16.38	17.29		14.04	13.91	16.315	12.09	11.765				0.065	0.65	3.25	9.75	7.54	9.1	1.235	0.455					10.4	5.33	13.325	8.905	12.285	6.695	9.49			2.99	1.04	9.62
13.3333	13.91	16.25	17.03		14.235	13.975	16.445	12.415	11.895				0.26	0.26	3.77	10.205	8.125	9.685	0.91	0.78					10.66	5.655	13.78	9.36	12.35	6.63	9.23			3.055	1.17	9.36
13.6667	13.455	16.445	17.42		14.17	14.235	16.315	12.285	11.895				0.325	0.78	4.03	10.66	8.125	9.685	0.975	0.13					10.79	6.305	13.455	8.645	12.675	6.89	8.84			3.315	1.365	10.01
14	13.195	16.835	17.68		14.235	14.43	16.64	12.48	12.025				0.13	1.3	5.655	10.4	8.58	10.335	1.365	0.13					11.115	6.24	13.715	8.645	12.805	7.15	9.62			3.705	1.3	9.23
14.3333	13.195	16.77	17.875		14.495	13.975	15.99	12.48	11.83				0.325	1.625	4.42	10.725	8.32	10.27	1.365	0.13					10.985	5.98	14.04	9.555	12.74	7.085	9.49			4.03	0.65	9.23
14.6667	13.585	16.965	17.81		14.69	14.235	15.99	12.87	12.155				0.455	1.235	4.875	10.725	8.385	10.66	2.535	0.52					10.985	6.11	14.17	9.1	13	7.67	9.62			4.42	0.585	10.27
15	13.195	16.965	18.07		14.17	13.845	15.34	13	11.895				0.39	1.235	4.485	10.985	9.035	10.92	2.6	0.585					10.465	6.63	13.845	9.425	12.87	8.06	9.945			5.07	0.39	9.62
Distance Between Poles
Time (Minutes)	KIF22-GFP												KIF22-GFP R149Q												KIF22-GFP V475G
-0.333333	12.87	13.13	10.075	9.62	9.295	9.425	13.39	10.4	10.595				9.1	10.4	11.7	11.635	10.595	11.18	9.425	9.88					10.92	10.985	12.61	12.87	10.205	9.815	8.58	9.815	7.8	10.79	10.66	10.01
0	13.39	13.65	9.945	9.945	9.49	9.945	13.975	10.725	10.27				8.97	10.53	11.96	11.7	11.05	11.375	9.945	10.01					11.31	11.18	13.455	12.935	10.075	9.425	8.58	10.01	8.255	10.855	10.79	10.075
0.333333	14.105	13.65	10.14	10.27	9.36	10.27	14.43	10.92	10.66				9.49	11.375	11.505	12.675	11.44	12.025	10.27	9.23					11.31	11.375	14.235	13.52	10.465	8.84	9.815	10.075	8.32	11.31	11.115	10.595
0.666667	14.885	14.04	10.27	10.855	9.75	10.465	15.21	11.05	10.465				9.815	11.895	12.545	13.325	12.675	12.545	10.335	9.36					12.09	11.7	15.145	14.69	10.92	10.595	9.815	10.725	9.62	11.83	10.855	10.66
1	15.21	14.69	11.05	11.18	9.815	10.465	15.47	10.855	10.53				10.335	12.155	11.505	14.495	13.65	13.65	11.245	9.035					11.31	12.025	15.925	15.405	11.31	11.375	10.4	10.985	10.79	11.895	10.855	10.725
1.33333	15.795	14.43	11.83	11.635	10.205	11.115	16.445	11.05	10.335				10.985	12.675	12.48	15.405	13.975	14.69	12.09	8.775					13.39	12.35	16.38	16.185	12.025	11.83	11.375	11.895	11.635	12.545	11.245	11.115
1.66667	16.25	15.08	12.35	11.83	10.855	11.44	16.705	11.44	10.92				11.57	12.935	13.585	16.51	15.015	15.275	11.895	8.905					13.975	12.87	16.315	16.9	12.675	13.455	11.895	12.48	12.285	13.325	11.31	11.83
2	16.64	13.975	13.195	11.96	11.375	10.985	16.835	11.895	11.505				11.96	13.065	14.235	16.12	15.015	15.73	11.83	7.475					13.845	13.195	16.315	16.77	13.065	14.235	12.415	12.74	13.065	13.91	10.985	12.285
2.33333	16.445	14.69	13.91	11.96	11.96	11.18	17.095	10.595	11.57				11.96	13.325	14.885	15.99	14.43	15.6	12.74	7.865					14.43	13.325	16.445	17.095	13.455	14.495	13.065	12.48	13.65	14.495	10.985	13.065
2.66667	16.705	15.21	14.82	12.09	12.025	11.57	17.16	12.285	12.22				12.22	13.065	15.145	15.6	14.43	16.055	12.805	8.58					14.105	13.195	16.315	16.64	13.845	14.43	12.935	12.09	13.65	14.495	11.18	13.325
3	17.095	14.885	14.885	11.83	12.285	12.74	16.9	12.35	11.83				12.545	13.26	15.535	15.795	15.34	15.86	13.26	8.58					14.17	12.87	16.575	16.965	13.52	14.95	12.805	12.155	14.495	14.04	11.115	13.39
3.33333	18.005	15.34	15.34	11.895	12.61	13.39	17.42	12.61	11.7				12.87	13.39	15.6	16.315	15.795	15.86	14.625	8.58					15.34	13	16.9	17.355	14.235	14.755	12.025	12.22	14.495	13.845	11.31	13.065
3.66667	17.875	15.665	15.925	11.765	12.675	13.325	18.005	12.415	12.285				12.87	13.325	15.73	16.64	15.73	15.925	14.04	8.905					14.95	13.715	17.29	17.615	13.91	14.69	12.35	12.35	15.08	13.65	11.375	13.13
4	17.94	16.185	15.925	12.09	13.13	13.65	18.135	12.415	11.7				12.48	13.65	16.185	17.03	16.12	16.315	14.3	9.425					14.43	14.43	17.68	17.745	13.975	14.56	12.22	12.22	15.795	13.715	11.505	13.585
4.33333	18.46	16.51	16.185	12.285	13.325	13.65	18.395	12.545	12.35				12.74	13.52	16.25	17.225	16.38	16.835	14.04	9.685					15.73	13.78	17.745	18.07	14.105	14.3	12.285	12.48	16.055	14.105	11.765	13.585
4.66667	19.435	16.965	16.51	12.35	14.43	13.78	18.33	13	12.35				12.805	13.91	16.315	18.135	16.25	17.03	13.65	9.815					16.38	13.585	18.005	18.525	13.845	14.17	12.675	12.61	16.055	13.975	11.57	13.845
5	19.695	16.705	17.095	12.805	15.145	13.845	18.785	14.235	12.415				12.87	13.975	16.965	17.81	16.51	17.225	14.625	10.53					17.615	13.39	18.135	18.525	14.3	14.04	12.74	12.805	16.38	14.105	11.635	14.3
5.33333	20.085	17.485	17.485	12.87	15.535	14.43	19.24	15.665	12.935				12.935	13.845	17.29	17.81	16.77	17.355	13.975	10.205					17.095	12.805	18.395	18.85	14.43	13.39	12.48	12.935	16.965	13.91	11.765	14.3
5.66667	20.735	17.81	17.16	13.65	15.665	14.56	18.915	14.69	13.065				13	14.105	17.68	17.68	16.38	17.095	13.845	10.075					15.99	13	18.59	18.59	14.105	13.195	12.415	13.325	16.77	13.585	11.7	14.69
6	21.58	18.005	17.16	13.585	16.77	14.95	19.24	15.08	13.325				12.74	13.39	17.42	17.68	15.99	17.225	14.365	9.425					16.9	12.935	18.59	18.525	13.455	13.455	12.22	13.13	17.225	13.325	11.7	14.95
6.33333	21.45	18.2	17.16	12.87	17.095	15.08	19.5	15.21	13.325				12.805	13.26	17.095	17.615	16.965	17.225	13.715	10.01					16.51	13.715	18.655	18.135	13.39	13.065	12.285	13.325	17.355	13.325	11.7	14.625
6.66667	21.32	18.265	17.55	13.325	17.745	15.21	19.955	15.665	13.455				12.48	12.87	17.42	17.42	16.445	16.835	13.78	9.75					17.81	14.04	18.655	18.07	13.325	13.065	12.61	13.455	17.55	13	11.635	15.08
7	21.58	18.33	17.68	13.845	18.005	15.925	20.54	16.055	13.13				12.155	13.13	16.64	16.705	15.665	16.445	13.065	9.425					17.81	13.78	19.045	18.33	13.325	12.61	12.415	13.195	17.485	13.13	11.635	15.34
7.33333	21.905	18.59	18.07	14.17	18.2	15.145	19.825	16.445	13.845				11.83	12.935	16.64	16.445	15.99	16.12	13.39	9.49					17.55	13.845	18.85	18.005	13.26	12.805	12.22	13.585	17.94	13.065	11.57	15.405
7.66667	22.295	18.46	18.2	14.56	18.2	15.275	20.995	16.77	13.26				11.635	12.35	15.99	15.99	15.665	15.925	13.26	9.1					18.33	14.04	18.85	18.135	13.455	12.805	12.285	13.455	17.745	12.545	11.635	15.665
8	22.23	18.72	17.94	14.885	19.11	15.795	21.255	17.03	13.455				11.18	12.285	15.795	15.99	15.47	15.34	13	8.97					17.745	13.845	18.785	18.655	13.195	12.48	12.87	13.65	18.005	12.35	11.31	15.73
8.33333	22.165	19.045	18.525	15.34	18.915	15.99	20.735	17.29	13.845				11.115	12.285	15.21	16.38	15.275	15.275	11.635	8.775					18.07	13.975	19.045	17.81	13.13	12.35	11.83	14.365	18.46	12.805	11.635	15.665
8.66667	22.36	18.85	19.045	15.925	19.5	16.445	21.515	17.55	13.845				10.595	11.31	14.56	14.885	14.56	14.56	11.115	8.385					18.005	13.65	18.915	17.68	13.13	12.74	11.96	13.78	18.33	12.545	11.7	15.73
9	23.14	19.5	18.655	16.445	19.5	16.38	22.49	18.395	14.105				10.66	10.855	14.105	14.365	14.3	14.235	11.115	9.035					17.55	13.325	19.305	17.485	12.87	12.805	11.505	14.69	18.72	12.545	11.83	15.795
9.33333	22.815	19.5	18.98	16.705	19.89	16.185	22.945	18.395	14.04				10.335	10.27	14.43	14.625	14.365	13.91	10.985	8.97					18.07	13.52	19.175	17.42	13.13	13.52	11.765	15.73	19.11	12.09	11.765	15.665
9.66667	22.815	19.5	19.37	16.77	19.955	16.64	22.88	18.59	14.885				10.335	9.555	14.43	15.015	13.845	13.39	10.335	8.84					15.925	13.26	19.37	17.29	13.195	12.935	10.66	15.47	18.59	12.415	11.765	15.73
10	23.53	20.02	19.565	17.29	20.475	17.225	22.88	18.33	14.755				10.075	9.815	13.52	15.21	13.78	13.52	10.075	8.645					16.185	13.65	19.435	16.705	13.455	13	11.635	15.535	19.435	12.48	11.96	15.6
10.3333	22.88	19.955	19.305	17.485	20.02	17.095	23.335	18.655	14.625				9.75	9.815	13.52	14.365	13.65	13.26	10.205	8.645					16.12	13.78	19.435	17.225	14.04	12.545	12.35	15.145	18.785	12.22	12.155	15.86
10.6667	22.945	19.63	18.915	17.745	19.825	16.9	24.05	19.24	14.69				9.75	10.205	13	14.17	14.3	13.195	9.88	8.645					16.055	13.585	19.695	17.355	14.105	13.78	12.415	14.95	19.565	12.87	12.09	15.665
11	22.945	20.02	19.5	17.615	19.955	16.965	23.465	18.135	14.82				9.62	10.335	12.35	13.585	12.87	13.195	9.945	8.775					16.185	14.365	19.565	16.835	15.08	12.87	12.805	13.715	18.72	13.13	12.415	15.795
11.3333	22.945	20.215	19.63	17.485	19.63	18.005	21.45	18.46	14.82				9.49	10.595	12.675	14.69	13.325	13.325	10.075	8.58					15.99	13.975	19.565	17.875	15.535	12.545	13.975	13.325	18.46	13.91	12.48	15.535
11.6667	23.075	20.41	19.695	17.29	19.825	17.94	22.88	18.98	15.405				9.49	10.725	12.74	14.17	12.675	13.325	10.595	8.775					15.795	15.08	21.19	17.095	16.185	13.325	14.495	13.065	18.525	12.805	12.22	15.99
12	23.14	20.215	20.02		19.89	17.94	23.27	17.94	15.405				9.685	9.1	12.805	15.73	13	13.455	10.4	8.905					15.925	14.43	21.125	16.575	16.12	13.065	14.365	13.39	18.33	13.26	12.48	15.73
12.3333	22.49	20.54	20.15		19.63	18.46	22.295	17.55	15.405				9.49	9.1	12.935	15.86	13.52	13.65	10.465	8.775					16.185	14.625	20.93	17.225	16.64	12.74	14.56	12.35		13.65	12.545	16.12
12.6667	22.425	20.28	20.345		19.045	18.005	23.075	17.42	15.275				9.36	9.75	13	16.38	14.04	14.105	10.79	8.775					16.055	14.885	21.125	17.29	17.485	13.845	15.6	13.065		13.325	11.96	15.665
13	22.555	20.865	20.345		19.63	18.525	21.58	17.68	14.95				9.49	9.425	13.195	16.445	14.495	14.755	10.595	8.84					15.99	14.82	20.41	17.94	16.38	13.13	16.445			13.065	12.48	15.86
13.3333	22.425	20.54	20.345		19.435	18.85	22.49	17.94	15.145				9.1	9.685	13.91	16.9	14.365	15.145	11.115	8.645					16.25	16.12	20.475	17.745	16.77	13.845	16.64			12.935	14.04	16.055
13.6667	22.035	20.41	20.475		19.5	18.395	22.945	16.965	15.34				9.36	9.815	13.845	16.705	13.845	15.47	11.375	8.71					16.185	16.12	20.41	18.46	17.095	12.87	15.795			13.39	13.78	16.055
14	22.75	20.54	20.605		20.085	19.175	22.425	16.9	15.275				9.23	10.92	14.17	17.16	14.885	15.99	11.505	8.905					16.185	16.38	20.345	18.46	17.03	13.78	15.275			13.195	13	16.185
14.3333	21.905	20.28	21.06		20.02	19.37	23.01	17.225	14.885				8.97	11.05	13.13	17.485	14.755	16.705	11.895	8.97					15.73	17.225	20.54	18.07	17.81	13.91	14.885			13.65	12.805	16.51
14.6667	21.905	20.215	21.385		20.475	19.175	22.555	17.42	15.665				9.295	11.57	12.805	18.2	15.665	17.095	12.74	9.23					15.86	17.16	20.28	16.835	17.68	14.43	15.665			14.885	13.325	16.575
15	20.995	20.345	21.58		20.28	18.655	23.27	17.485	16.64				9.23	11.635	14.625	18.33	16.835	17.485	12.805	7.93					16.12	17.225	20.345	16.965	17.68	14.495	15.665			14.04	12.74	16.835
Distance Centromeres to Poles
Time (Minutes)	KIF22-GFP																								KIF22-GFP R149Q																								KIF22-GFP V475G
-0.333333	5.46	5.525	6.565	6.37	4.875	4.94	4.355	4.615	4.615	4.29	3.965	4.485	6.565	6.435	4.94	4.615	5.2	5.135							4.55	3.9	4.55	4.55	5.85	4.68	5.2	5.72	5.265	5.005	5.525	5.395	4.68	4.355	4.03	4.42									5.395
0	5.395	5.85	6.76	5.005	4.875	4.875	4.875	4.225	4.485	3.965	4.68	4.745	6.045	6.955	5.135	4.875	4.875	4.42							4.485	3.77	5.135	5.135	5.915	4.745	5.655	5.655	5.005	5.33	5.525	5.46	4.875	4.68	4.225	3.965									4.745
0.333333	5.395	5.135	5.135	4.745	5.07	4.68	5.07	4.29	4.485	4.16	4.875	5.07	5.98	6.435	5.135	5.33	5.07	5.07							4.485	4.29	5.005	4.875	5.655	4.68	5.135	5.785	4.615	4.81	4.745	4.94	4.68	4.81	3.51	3.055									4.875
0.666667	5.33	5.72		3.9	5.005	5.07	5.07	4.81	4.875	4.16	4.55	5.005	5.655	6.175	5.395	5.46	5.135	4.745							4.875	3.445	4.355	3.835	6.175	5.135	4.81	4.55	4.94	4.68	4.745	4.485	4.615	4.29	3.51	2.86									3.965
1	5.655	4.875	5.135	5.005	5.135	4.355	4.03	4.485	4.81	3.835	4.03	5.135	4.94	6.175	5.2	5.395	4.095	4.355							3.835	3.575	4.355	3.51	4.095	5.135	5.07	4.55	4.875	4.875	5.07	4.68	4.29	5.005	3.185	2.015									3.64
1.33333	5.395	5.395	4.03	4.03	4.55	4.225	3.64	4.68	4.68	2.925	4.94	3.64	5.33	5.265	5.46	5.46	3.835	4.095								3.185	4.355	3.51	5.005	4.745	4.745	4.68	4.16	4.485	4.745	4.55	4.355	4.68	2.99	1.95									5.07
1.66667	5.72	5.59	5.85	3.185	4.03	3.9	4.29	4.29	4.68	3.315	4.29	4.42	4.29	4.355	5.135	3.965	4.03	4.29								3.38	3.965	4.03	5.135	4.29	5.655	4.225	4.095	4.875	4.745	4.68	3.445	3.965	3.25	1.04									5.005
2	5.915	5.72	5.33	1.82	3.9	3.51	3.965	3.965	5.2	3.25	4.095	3.25	5.525	5.135	3.9	3.965	3.12	4.55							4.29	3.315	3.9	3.835	5.655	4.095	5.135	3.575	4.03	4.875	4.615	5.135	3.38	3.64	1.82	1.17									4.225
2.33333	5.85	5.72	3.9	2.795	3.77	3.51	3.77	2.86	4.225	2.275	3.315	4.095	5.915	4.42	0.78	4.095	3.12	3.705							4.095	2.86	4.42	4.485	5.785	4.29	4.16	4.095	3.575	4.485	3.64	4.29	3.445	4.03	2.21	0.845									4.615
2.66667	4.81	4.615	3.77	2.73	3.835	3.9	3.835	3.965	3.575	2.99	2.535	3.705	5.525	3.9	3.835	3.9	3.315	4.03							4.225	2.795	3.38	3.315	5.655	3.835	3.445	2.925	3.51	4.225	3.835	4.225	3.185	2.08	2.34	0.65									4.03
3	5.395	5.07	2.86	1.95	3.315	4.16	4.29	2.86	4.81	2.6	3.25	3.965	5.2	4.55	2.925	3.51	2.86	3.51							3.965	2.795	3.9	2.86	5.265	3.9	4.355	2.405	3.575	4.745	3.965	3.575	3.25	4.355	2.275	1.04									3.575
3.33333	5.98	5.265	3.575	1.95	3.185	3.705	3.705	2.73	4.68	1.17	4.03	3.055	3.9	4.29	4.16	3.055	2.535	3.38							3.965	2.925	3.705	2.86	5.265	4.355	3.575	3.38	3.77	4.03	3.705	2.99	3.965	4.68	2.015	1.755									2.405
3.66667	5.33	4.94	3.12	2.34	3.965	3.25	4.03	2.86	4.485	0.91	3.315	3.445	4.55	4.095	2.925	3.315	2.925	3.185							4.745	2.6	3.77	2.795	4.875	3.965	3.445	3.705	3.38	4.355	3.705	3.12	4.095	3.835	2.275	1.43									3.315
4	4.615	4.68	2.99	2.145	3.25	2.405	4.355	3.12	3.64	0.78	2.405	2.925	4.55	3.9	1.56	3.185	2.34	3.055							3.51	2.405	3.64	2.34	5.07	4.485	3.25	3.38	3.25	3.9	3.705	2.925	4.16	3.835	2.21	1.885									1.885
4.33333	4.68	4.745	2.795	2.47	3.055	1.95	3.77	2.405	4.03	2.6	1.82	3.77	4.355	4.16	2.015	2.86	1.885	3.315							4.68	2.47	3.185	3.055	4.745	4.095	2.795	3.705	3.12	3.965	3.965	3.185	4.225	3.77	2.275	2.275									2.275
4.66667	5.2	4.81	2.86	2.275	2.47	2.145	4.42	2.015	3.185	2.99	2.6	3.185	3.64	3.25	1.56	2.99	2.21	3.38							3.575	2.21	3.055	3.25	4.68	3.705	3.12	3.965	2.73	3.705	3.055	3.12	3.77	2.925	2.34	0.975									2.47
5	4.94	4.875	2.73	2.405	2.665	1.755	4.225	2.08	2.99	1.365	2.145	2.99	3.965	3.705	2.86	3.12	2.145	2.86							3.77	2.21	3.315	3.185	4.875	3.64	3.12	3.705	3.12	3.9	3.77	2.925	4.095	3.835	2.34	1.495									2.73
5.33333	4.68		2.99	2.015	2.925	2.47	3.77	2.21	2.86	2.795	3.185	3.055	3.38	3.835	4.355	1.82	2.86	0.845							3.705	2.34	2.99	2.665	4.81	3.705	3.705	3.185	3.315	3.64	3.575	3.055	3.9	3.705	2.405	1.235									2.86
5.66667	5.135	4.55	2.925	3.055	1.82	1.95	3.64	2.405	2.99	2.405	2.73	3.25	3.64	2.86	2.275	2.535	1.82	2.6							4.095	2.6	2.99	3.38	4.94	4.03	2.73	3.25	3.185	4.095	3.12	2.86	3.445	4.03	2.21	2.47									2.795
6	5.2	4.615	2.73	2.21	2.015	1.625	3.705	2.08	3.315	2.21	2.6	2.925	3.055	3.25	2.08	2.86	1.755	2.665							3.51	2.145	2.86	2.99	5.135	3.51	2.47	2.925	3.12	3.965	3.12	3.12	4.16	4.355	1.495	2.73									2.73
6.33333	4.94	4.485	2.86	2.73	1.625	1.43	3.315	2.405	3.77	1.625	2.925	2.665	3.77	2.665	2.275	2.535	1.755	2.535							3.9	2.535	2.795	3.12	4.485	4.03	2.665	3.38	3.835	3.575	3.575	3.12	3.965	3.185	2.405	1.82									2.925
6.66667	4.94	5.265	2.6	1.365	2.015	1.82	3.185	2.665	3.64	1.82	2.405	2.145	3.12	3.315	2.6	2.47	1.69	2.405								2.795	2.665	2.99	4.94	3.575	3.575	3.705	3.185	4.095	3.575	3.185	4.16	3.445	2.6	1.625									3.055
7	4.68	5.46	2.6	1.43	1.625	1.69	3.055	2.405	3.445	2.34	2.925	1.755	3.51	3.445	1.82	2.73	1.3	2.21							3.12	2.535	2.73	3.12	4.745	2.47	2.795	3.445	3.055	3.64	3.64	2.99	3.51	3.12	1.885	1.885									3.185
7.33333	4.615	4.095	2.535	1.365	1.69	1.82	2.6	2.21	3.315	2.015	1.755	0.91	3.64	2.73	2.405	2.665	1.885	2.275								2.08	2.795	3.445	4.485	2.665	3.185	3.25	2.99	3.77	3.575	3.25	3.77	4.095	2.21	1.885									3.965
7.66667	4.225	5.33	2.34	1.365	1.755	1.625	3.185	2.925	3.25	2.145	1.69	1.17	3.64	3.575	1.755	2.405	0.975	1.885							3.705	2.34	2.665	3.38	3.965	2.535	3.185	2.47	2.795	3.575	3.445	3.445	3.445	4.16	2.145	2.21									4.42
8	4.225	4.94	2.34	1.3	1.365	1.235	2.925	2.665	3.315	1.885	1.82	1.17	3.315	2.925	2.275	2.73	1.365	2.015								1.95	3.055	2.99	3.965	2.795	3.315	2.86	2.925	3.705	3.315	3.185	3.38	4.485	2.535	2.405									3.38
8.33333	4.225	4.68	2.145	1.885	2.015	1.17	2.795	2.275	3.705	1.82	1.56	2.6	3.12	2.405	2.015	2.535	1.17	1.69							3.25	2.925	1.495	2.665	4.485	3.575	3.965	3.25	3.25	3.25	3.38	3.51	3.315	3.38	2.405	2.6									4.42
8.66667	4.095	4.68	2.015	2.015	2.275	2.145	3.12	2.73	3.51	1.625	2.145	1.82	2.535	3.185	1.755	2.21	1.69	2.405							3.64	2.6	2.86	2.795	4.095	3.315	3.445	2.535	2.665	3.12	3.965	1.56	3.835	3.51	1.95	2.145									4.42
9	4.16	4.94	2.405	2.34	1.365	2.275	3.705	2.6	3.12	2.405	2.73	1.82	2.925	3.055	1.69	3.25	1.3	1.56								2.86		3.25	4.16	2.275	2.795	2.795	2.665	3.445	3.315	3.315	4.03	3.64	2.6	3.055									3.055
9.33333	4.355	4.42	2.34	2.275	1.885	1.95	3.51	2.6	3.185	1.56	2.34	1.17	3.445	3.705	1.885	3.38	0.78	1.755								2.47	3.055	2.86	4.615	2.145	2.73	2.535	3.38	3.185	3.575	3.64	3.64	3.185	2.665	2.73									4.42
9.66667	3.77	5.07	2.535	2.275	1.82	2.015	3.51	2.405	3.25	1.82	2.08	1.365	3.705	2.925	2.535	2.535	2.21	1.69							4.03	2.99	2.015	2.535	4.29	2.99	2.47	2.405	3.38	3.185	3.055	1.69	3.315	2.99	2.535	2.6									2.665
10	4.615	5.265	2.275	2.405	1.82	2.08	4.16	2.34	3.055	2.405	1.82	1.17	3.77	2.925	1.56	2.405	1.365	1.495							4.225	2.99	2.6	2.99	4.485	2.015	3.705	2.73	2.86	3.445	2.99	1.95	3.12	3.055	2.665	2.275									2.34
10.3333	3.64	4.68	2.34	2.145	1.43	1.82	4.095	2.275	2.86	1.755	2.665	1.82	3.25	3.835	3.25	3.12	1.235	1.755							4.03	2.795	2.925	2.73	4.095	2.535	2.015	2.47	2.925	0.26	3.055	1.43	3.315	2.925	2.6	2.21									2.535
10.6667	3.64	4.81	2.21	1.82	1.3	1.885	4.03	2.145	3.25	1.235	2.73	1.365	5.07	3.25	3.705	2.535	0.065	1.235							4.03	2.405	3.25	2.925	4.42	3.575	2.925	2.015	4.03	2.925	2.6	2.145	3.055	2.99	2.73	2.21									2.21
11	3.77	4.875	2.015	1.755	1.235	1.43	3.705	1.365	3.38	1.3	2.925	1.43	3.575	3.25	2.535	2.6	0.52	1.17							4.225	2.73	3.575	3.12	3.77	2.405	1.3	2.34	2.86	1.69	2.405	1.56	3.315	2.6	2.665	2.405									2.34
11.3333	3.64	4.68	2.015	2.015	1.235	1.885	4.03	1.885	2.925	1.105	2.99	1.82	2.405	2.73	2.795	2.535	0.845	2.08							3.9	2.47	3.445	3.185	4.42	3.25	2.015	2.73	3.055	1.885	2.665	1.56	3.315	2.795	2.535	2.405									2.34
11.6667	4.03	4.81	2.34	1.69	1.625	1.755	3.705	1.495	2.925	1.3	3.25	1.69	2.665	2.08	3.185	2.73	0.715	2.08							4.095	2.86	4.16	2.405	4.55	3.185	2.535	2.145	3.185	2.145	2.47	1.95	3.12	3.445	2.535	2.6									2.08
12	4.16	4.485	1.95	1.755	2.08	1.56			2.86	1.495	3.055	1.82	3.315	2.86	1.885	1.69	0.65	2.34							4.355	2.86	3.77	2.145	4.355	1.495	2.73	2.6	2.6	1.755	2.405	1.56	3.25	3.12	2.405	2.21									2.34
12.3333	4.095	4.095	2.21	2.08	2.08	1.69			2.795	1.04	2.795	2.015	2.535	1.95	3.12	1.82	0.91	1.43							3.77	2.665	3.64	1.95	4.355	3.055	1.04	3.12	2.73	2.08	2.08	1.3	3.38	2.73	2.535	2.405									2.21
12.6667	3.965	4.095	2.275	1.56	1.56	1.95			2.6	1.17	0.715	1.3	2.47	2.99	0.78	2.405	0.52	2.405							3.705	2.795	4.42	2.99	4.355	2.34	1.235	2.665	2.73	2.145	2.275	1.04	3.315	2.925	2.86	2.34									1.82
13	4.68	4.095	2.34	1.885	1.365	1.235			2.34	2.21	1.3	1.365	1.69	2.08	1.69	0.065	0	2.275							3.835	2.99	3.25	3.055	4.485	2.015	2.015	2.665	2.99	2.47	2.47	1.69	3.315	2.535	2.795	2.015									1.885
13.3333	4.42	4.16	2.015	1.755	1.82	1.56			2.21	2.405	1.43	1.625	1.95	2.6			0.78	2.73							3.77	2.925	3.055	4.745	4.485	1.625	1.105	3.51	3.25	2.275	2.145	0.065	3.38	2.665	2.795	2.08									1.885
13.6667	4.225	4.29	2.145	1.365	1.04	1.3			2.015	1.43	1.04	1.17	1.755	3.25			0.13	2.795							4.355	2.73	3.25	3.12	4.875	2.665	2.47	2.015	2.925	1.95	2.73	1.17	3.77	3.185	2.73	3.055									1.95
14	4.615	4.095	1.495	1.82	1.105	1.235			2.6	2.925	0.845	1.625	1.885	2.275			0.195	3.055							3.965	2.145	3.9	3.575	4.42	2.21	1.625	2.34	2.21	2.86	2.08	2.015	3.575	2.925	2.665	2.99									1.755
14.3333	4.225	4.225	1.56	1.95	1.755	1.3			2.21	1.82	1.885	1.95	2.47	2.34			0	2.47							3.77	2.73	4.485	3.51	4.355	1.755	2.015	2.795	2.925	0.975	2.665	1.69	3.705	2.99	2.99	2.86									1.235
14.6667	4.095	4.225	1.43	1.04	1.43	1.56			2.275	1.885	1.3	1.69	1.82	2.665			0.26	2.6							3.835	2.86	4.29	4.095	4.485	0.455	1.56	3.185	2.405	2.665	2.99	3.185	4.225	3.185	3.055	2.405									1.82
15	3.315	3.705	1.755	1.235	2.08	1.17			2.145	1.885	1.235	1.43	1.82	3.835			0.585	2.405							3.705	2.925	4.29	4.29	4.29	3.185	2.275	2.73	3.38	2.47	2.795	3.185	3.77	3.835	1.625	1.885									1.69
Distance Chromosomes to Poles
Time (Minutes)	KIF22-GFP																								KIF22-GFP R149Q																								KIF22-GFP V475G
-0.333333	6.11	6.11	6.5	6.435	4.875	4.94	4.615	4.485	4.485	4.615	4.68	4.42	6.63	6.63	5.2	4.485	5.265	4.875							4.55	3.965	5.2	4.55	5.85	4.42	5.2	5.785	4.94	5.265	5.59	5.46	4.68	4.42	4.615	4.875									4.81
0	5.915	6.435	6.76	6.76	4.875	4.615	4.94	4.875	4.29	4.615	4.94	4.745	6.825	6.63	5.33	4.81	5.135	4.42							4.485	3.77	5.265	4.485	5.98	4.42	5.395	5.785	5.07	5.395	5.655	5.395	4.94	4.615	5.005	4.94									4.94
0.333333	5.785	6.37	7.085	6.955	4.94	4.94	5.135	4.875	4.55	4.42	5.07	5.07	7.15	6.565	5.46	4.94	5.33	4.94							4.745	4.095	5.655	4.81	5.72	4.745	6.305	6.045	4.81	5.33	5.98	5.85	5.005	4.55	4.55	4.55									5.07
0.666667	6.175	6.76	5.85	5.525	5.07	5.005	5.265	5.2	4.745	4.615	5.135	4.81	6.5	6.695	5.525	5.265	5.2	4.875							4.875	3.77	5.655	4.485	6.24	5.135	4.94	5.59	5.135	5.98	5.98	5.46	5.07	4.55	4.42	4.55									5.005
1	6.11	6.5	5.72	5.59	5.46	5.265	5.59	4.68	4.875	4.875	5.07	5.005	6.305	6.045	5.33	5.2	5.2	4.875							5.07	3.9	5.2	4.095	5.72	5.2	5.59	5.98	4.875	6.37	5.265	5.655	5.395	5.395	4.29	4.485									5.135
1.33333	6.63	6.175	5.525	5.525	5.395	5.135	5.72	4.94	5.07	5.005	5.525	5.395	6.695	6.24	5.265	5.46	5.135	4.745							5.33	4.03	5.07	4.29	6.24	5.33	5.46	5.395	4.875	5.265	5.915	5.59	5.525	5.85	4.095	4.355									6.305
1.66667	6.825	6.695	5.59	5.135	4.55	4.875	5.525	4.42	5.33	5.2	5.72	5.655	6.045	5.2	5.72	5.33	5.46	5.005							5.46	3.835	5.2	3.835	6.63	5.135	5.785	5.59	4.745	5.915	5.85	5.265	5.655	4.16	4.42	4.29									6.955
2	7.15	8.125	5.46	4.615	4.615	4.68	5.915	5.005	5.33	5.655	5.395	5.005	5.33	5.655	5.59	5.915	5.72	4.81							5.72	3.965	5.135	4.03	6.89	5.07	5.265	4.94	4.94	5.85	5.98	5.395	4.94	4.16	3.445	3.64									5.46
2.33333	6.305	7.995	4.81	4.94	4.225	5.005	5.85	4.68	5.525	4.94	4.745	4.55	6.11	5.59	5.2	4.875	5.785	4.81							5.655	3.25	4.94	4.29	7.02	5.265	4.355	4.875	3.705	5.2	5.59	4.485	5.59	4.16	3.9	3.64									6.63
2.66667	6.045	6.5	4.55	4.03	4.81	4.94	5.915	4.55	4.68	5.72	4.81	4.55	4.485	5.525	6.045	4.81	5.265	4.355							5.33	3.51	4.225	3.705	6.565	4.485	4.55	4.225	3.575	4.81	5.46	4.29	5.72	4.29	4.29	3.445									6.63
3	6.565	6.175	3.445	3.315	4.745	4.615	5.915	4.29	4.94	5.135	4.875	4.42	4.485	4.615	5.395	4.68	4.225	4.16							5.395	3.835	4.355	3.38	6.37	4.94	4.225	3.9	3.25	5.2	5.265	3.705	5.915	4.55	4.29	4.16									6.695
3.33333	6.89	5.72	3.64	3.9	4.42	4.16	4.615	4.875	4.745	3.77	5.785	3.9	4.81	4.55	5.915	4.55	3.64	4.225							5.525	3.64	4.355	3.445	6.565	4.355	3.965	4.03	3.315	5.2	3.9	3.965	5.915	5.525	4.29	4.225									7.67
3.66667	6.24	5.98	3.25	3.315	4.355	3.77	4.355	3.51	3.38	3.445	4.29	4.095	5.07	4.68	6.11	4.29	4.615	4.095							4.81	3.315	4.03	3.12	5.655	4.55	3.77	4.095	3.185	4.875	4.42	3.835	5.98	4.615	3.835	4.355									7.475
4	5.785	6.305	2.99	3.055	3.185	2.73	4.485	3.055	3.25	3.315	4.355	3.64	4.615	3.965	5.59	3.64	3.705	4.16							4.745	3.055	4.29	3.185	6.5	4.68	3.9	4.03	3.12	4.875	4.03	3.315	5.72	5.59	4.16	4.485									7.15
4.33333	5.72	5.395	3.185	2.86	3.38	2.86	4.03	3.12	2.99	2.99	4.03	3.51	4.42	4.225	5.98	3.77	3.9	3.64							4.81	3.12	3.9	3.055	5.395	3.9	3.12	3.9	3.25	4.745	4.355	3.38	5.135	4.355	3.965	4.745									4.81
4.66667	6.175	5.46	2.99	3.25	2.665	2.535	3.835	2.6	2.795	3.445	3.51	3.25	4.42	3.575	3.445	3.51	3.705	3.77							4.355	3.12	4.225	3.12	5.785	3.835	4.42	4.095	3.12	4.68	4.355	3.705	3.965	4.94	4.355	4.68									5.2
5	5.72	5.59	2.665	2.86	3.25	2.405	3.9	2.405	3.315	3.12	3.315	3.51	4.095	4.355	3.64	3.38	3.315	3.9							4.55	2.86	4.16	3.055	5.33	3.835	3.51	3.965	3.445	4.615	4.16	3.575	5.2	5.525	4.485	4.68									5.005
5.33333	5.72	5.46	3.055	3.38	3.25	2.275	3.965	2.535	3.185	2.795	3.64	3.25	3.9	4.16	4.94	3.38	3.445	3.055							4.355	2.99	4.095	3.185	5.525	4.225	3.705	3.51	3.705	4.55	4.03	3.25	4.81	4.095	4.095	3.185									4.875
5.66667	5.72	5.46	2.795	3.12	2.73	2.015	3.965	2.665	2.86	2.535	3.575	3.38	3.965	3.64	3.055	3.315	2.535	3.51							4.29	3.12	4.03	3.51	5.395	4.485	3.77	3.77	3.38	4.485	3.965	3.445	3.445	4.29	3.965	3.12									4.42
6	5.46	5.525	2.6	2.99	2.665	1.69	3.64	2.6	3.315	2.86	3.9	2.795	3.705	3.51	3.12	3.25	2.73	3.25							4.485	3.12	3.445	3.51	5.33	4.03	3.51	3.64	2.99	4.355	4.225	3.835	5.46	5.2	3.38	3.185									4.485
6.33333	5.135	5.395	2.535	2.925	1.95	1.885	2.795	2.535	3.315	3.055	3.64	2.99	3.9	3.575	2.795	3.055	2.535	2.73							4.095	3.25	3.705	3.315	5.005	4.16	3.77	3.77	3.965	4.615	3.9	3.64	5.135	4.485	4.225	3.38									4.55
6.66667	5.135	5.2	2.535	2.99	2.34	2.145	3.055	2.665	3.315	2.34	3.64	2.86	3.77	3.705	2.6	3.12	2.34	2.535							4.355	3.12	3.51	3.185	4.94	5.2	3.64	4.03	3.25	4.485	3.835	3.445	4.745	4.42	3.64	3.575									4.29
7	4.68	5.33	2.535	2.925	1.885	1.885	2.795	2.6	3.64	1.95	3.9	2.795	3.705	3.705	2.535	2.86	2.405	2.405							4.225	3.445	3.705	3.445	5.005	4.68	3.705	3.705	2.99	4.16	3.77	3.64	4.615	4.16	3.51	3.38									4.355
7.33333	4.94	5.33	2.34	2.535	1.95	2.535	2.86	2.47	3.12	1.95	2.925	2.6	3.51	2.665	2.34	3.055	2.47	2.405							4.095	2.73	3.51	3.38	4.94	4.615	3.705	3.835	3.575	4.16	3.9	3.705	4.94	4.68	3.705	3.835									4.81
7.66667	4.94	5.46	2.275	2.47	1.755	1.82	2.86	2.6	3.12	2.34	2.665	2.47	3.575	3.51	2.34	2.86	1.43	1.82							4.55	3.055	3.9	3.185	4.615	4.42	3.835	3.51	3.445	4.225	3.77	3.77	4.615	5.265	4.55	4.355									5.135
8	4.745	5.135	2.47	2.47	1.82	1.755	2.86	2.405	3.38	2.21	3.12	2.405	3.64	3.12	2.47	2.86	1.82	1.95							4.485	2.99	3.64	3.835	4.875	4.42	4.225	3.575	3.705	4.225	4.225	3.965	4.615	5.655	4.485	4.225									4.29
8.33333	4.68	4.875	2.535	2.47	2.145	2.08	2.795	2.21	3.25	2.145	2.795	2.86	3.38	2.795	2.145	2.795	2.21	1.885							4.485	2.99	4.095	4.095	5.005	4.68	4.745	4.16	3.9	3.9	4.745	4.485	4.29	4.875	4.095	3.835									5.2
8.66667	4.81	5.135	2.08	2.275	2.145	2.145	3.185	2.47	3.185	2.795	3.575	2.08	2.99	3.445	1.885	2.86	2.21	1.885							4.42	2.86	3.77	3.835	4.615	4.55	4.355	3.77	3.835	3.9	4.615	3.51	4.42	4.745	3.705	3.835									5.005
9	4.81	5.395	2.275	2.73	1.82	2.145	2.925	2.535	3.055	2.47	3.25	2.08	3.51	3.575	1.82	3.51	2.015	1.69							4.68	3.12	3.77	3.77	5.2	4.42	3.64	4.03	3.445	4.355	4.42	3.575	4.94	4.485	4.485	4.485									3.77
9.33333	4.68	4.81	2.145	2.47	2.08	2.015	3.055	2.405	3.185	2.665	3.185	2.145	3.64	3.705	1.755	3.185	1.95	1.625							4.68	3.12	4.095	3.25	4.94	5.135	4.225	3.965	3.835	4.355	4.29	4.485	5.46	4.94	4.225	4.16									4.875
9.66667	4.485	5.07	2.08	2.34	2.21	2.08	3.055	2.405	2.925	2.535	2.73	2.21	4.225	3.25	1.885	3.055	2.405	1.56							4.68	3.12	3.835	2.795	4.875	5.33	4.875	4.355	4.225	4.095	4.16	4.42	5.135	4.745	4.42	4.29									2.99
10	5.07	5.2	2.275	2.535	2.015	2.08	3.38	2.21	3.25	3.25	3.315	2.145	4.615	3.12	2.795	2.6	2.21	1.495							4.745	5.005	3.965	2.925	5.2	4.55	5.2	3.77	4.095	4.225	4.81	4.42	4.81	4.29	3.9	4.03									3.12
10.3333	4.355	4.875	2.145	2.34	1.625	1.95	3.185	2.275	3.185	2.795	3.055	2.275	4.03	3.835	3.055	2.925	1.755	1.885							4.615	4.68	4.225	2.86	5.07	4.875	4.485	3.51	4.355	4.16	4.94	3.9	4.68	4.615	4.29	4.225									3.12
10.6667	4.03	4.94	2.015	2.015	1.625	1.43	3.9	2.34	3.185	2.405	3.25	1.82	5.46	3.25	3.835	2.665	1.69	1.82							4.68	4.81	4.42	3.25	5.07	3.9	4.55	3.575	5.005	4.55	4.68	3.9	4.745	4.355	4.29	4.095									2.99
11	3.9	4.94	2.015	2.21	1.69	1.82	3.77	2.535	3.185	2.47	2.535	1.69	4.42	3.64	2.925	2.73	1.69	1.95							4.68	4.745	4.485	3.445	4.42	3.77	3.835	3.575	4.355	3.64	3.51	3.9	4.81	4.94	4.095	3.9									3.12
11.3333	3.835	5.005	2.015	2.21	1.885	1.82	3.575	2.34	3.055	2.405	3.055	2.275	3.575	2.47	3.055	3.055	1.495	1.755							4.745	4.29	4.615	3.965	5.135	3.445	4.615	3.12	4.81	3.77	3.64	2.275	4.68	4.485	4.29	4.03									3.055
11.6667	3.835	5.07	2.145	2.21	1.885	1.625	3.25	2.6	3.185	2.665	2.86	2.08	4.225	3.315	3.835	3.055	1.495	1.95							4.615	4.615	4.68	3.965	5.005	5.2	3.575	2.86	3.965	2.925	2.795	2.99	5.2	5.135	4.16	4.225									2.665
12	4.16	5.135	1.95	2.275	1.82	1.495			3.185	3.055	2.795	2.015	4.485	2.99	3.315	2.34	1.625	1.95							4.81	4.55	4.55	4.355	5.005	5.005	3.575	3.9	3.055	4.095	2.925	2.275	5.07	4.875	4.03	3.9									2.795
12.3333	3.77	4.485	1.95	2.275	1.885	1.625			2.99	2.925	2.665	2.275	3.445	2.86	3.25	2.405	1.105	2.21							4.745	4.615	4.55	4.225	5.265	3.25	2.925	4.615	3.64	3.705	2.145	2.795	5.005	4.42	4.03	4.355									2.86
12.6667	4.42	4.42	1.95	2.145	1.95	1.755			2.795	2.47	2.275	1.82	3.705	3.575	2.86	2.535	1.235	2.6							4.55	4.615	4.745	4.81	5.135	3.25	2.86	4.03	3.64	3.185	2.47	2.015	5.395	4.745	3.9	4.03									2.73
13	4.225	4.68	2.08	2.405	1.69	1.365			2.6	2.99	2.34	2.275	2.73	2.535	3.055	2.535	0.845	2.34							4.745	4.68	4.225	4.55	5.07	4.875	2.86	3.835	3.705	3.25	2.925	2.73	4.81	4.55	4.16	4.225									2.405
13.3333	4.225	4.29	1.885	2.405	1.885	1.43			2.405	2.795	3.12	1.755	3.12	2.925	3.315	2.21	0.78	2.47							4.485	4.355	4.81	4.615	5.395	4.745	2.99	3.705	2.99	3.25	2.73	2.73	5.395	4.81	3.77	4.095									2.34
13.6667	3.965	4.615	1.95	2.015	1.56	1.495			2.21	3.12	2.21	1.95	3.055	3.575	2.665	2.015	0.585	2.86							4.68	4.355	4.68	4.355	5.135	4.68	2.47	3.575	2.99	2.73	2.795	2.99	5.525	4.875	4.355	4.225									2.405
14	4.615	4.94	1.755	1.95	1.56	1.365			2.535	3.315	2.925	1.82	2.99	2.795	2.665	1.755	0.91	2.34							4.55	4.55	4.68	4.94	5.33	3.185	3.25	3.51	3.055	3.25	2.795	2.86	5.33	4.81	4.355	4.42									2.145
14.3333	4.095	4.615	1.56	1.95	1.755	1.43			2.34	3.185	3.25	2.145	3.38	3.64	2.795	1.95	0.52	2.535							4.485	4.16	4.745	4.68	4.875	3.835	3.575	3.185	3.575	2.86	3.25	3.185	5.525	5.005	4.485	4.355									2.015
14.6667	3.965	4.355	1.625	1.625	1.82	1.755			2.21	3.575	2.665	2.275	3.055	3.51	2.795	1.755	1.105	2.405							4.55	4.29	4.875	5.46	5.33	2.6	3.64	3.835	3.445	3.835	3.38	3.055	4.81	5.395	4.16	4.55									2.665
15	3.64	4.16	1.755	1.625	1.82	1.69			2.275	3.835	2.73	2.08	3.185	4.745	2.665	1.82	1.755	2.99							4.485	4.355	4.615	5.785	5.33	4.81	3.77	3.575	3.64	4.16	3.25	3.315	4.94	5.265	3.705	3.64									2.47
[truncated: 23 more columns]
