# Supplementary material for: Pathogenic mutations in the chromokinesin KIF22 disrupt anaphase chromosome segregation
Source: eLife journal article supplement (doi:10.7554/elife.78653), 2022-06-22
Supplement: supp [file F6 FS1 Nuclear Solidity RPE1.xlsx]

## Sheet: Sheet1
GFP + Control KD	GFP + KIF22 KD	WT + Control KD	WT + KIF22 KD	R149Q + Control KD	R149Q + KIF22 KD	V475G + Control KD	V475G + KIF22 KD
0.975	0.959	0.919	0.944	0.916	0.938	0.948	0.89
0.958	0.971	0.924	0.949	0.914	0.767	0.788	0.957
0.965	0.933	0.921	0.975	0.935	0.935	0.899	0.98
0.943	0.954	0.925	0.966	0.855	0.927	0.876	0.954
0.97	0.97	0.907	0.971	0.884	0.938	0.978	0.931
0.927	0.971	0.944	0.95	0.928	0.919	0.951	0.898
0.965	0.961	0.971	0.952	0.944	0.91	0.882	0.923
0.842	0.943	0.905	0.973	0.911	0.952	0.919	0.855
0.982	0.979	0.866	0.945	0.834	0.937	0.833	0.973
0.931	0.951	0.918	0.97	0.898	0.952	0.96	0.886
0.969	0.955	0.978	0.975	0.914	0.902	0.925	0.907
0.955	0.957	0.945	0.86	0.952	0.969	0.867	0.968
0.974	0.95	0.965	0.916	0.969	0.812	0.915	0.959
0.975	0.979	0.976	0.901	0.983	0.966	0.879	0.938
0.966	0.974	0.956	0.964	0.944	0.891	0.89	0.973
0.95	0.961	0.837	0.961	0.978	0.883	0.811	0.958
0.97	0.975	0.964	0.954	0.968	0.949	0.974	0.921
0.966	0.973	0.96	0.962	0.925	0.935	0.975	0.79
0.977	0.972	0.97	0.971	0.909	0.857	0.963	0.9
0.977	0.959	0.97	0.865	0.942	0.92	0.887	0.954
0.964	0.929	0.94	0.969	0.922	0.96	0.943	0.937
0.96	0.959	0.954	0.971	0.937	0.941	0.939	0.968
0.971	0.974	0.979	0.956	0.954	0.894	0.918	0.941
0.973	0.975	0.971	0.954	0.809	0.942	0.943	0.933
0.979	0.975	0.883	0.913	0.923	0.955	0.927	0.817
0.936	0.969	0.972	0.974	0.957	0.924	0.88	0.908
0.971	0.98	0.974	0.95	0.852	0.764	0.94	0.969
0.932	0.966	0.952	0.967	0.889	0.913	0.966	0.876
0.978	0.978	0.962	0.965	0.865	0.875	0.907	0.956
0.976	0.967	0.964	0.952	0.863	0.858	0.895	0.935
0.944	0.957	0.971	0.914		0.907	0.82	0.938
0.976	0.981	0.964	0.978		0.917	0.877
0.963	0.973	0.796	0.829		0.963	0.91
0.969	0.956	0.956	0.959		0.927	0.79
0.969	0.978	0.972	0.962		0.878	0.927
0.979	0.958	0.855	0.961		0.729
0.859	0.977	0.947	0.976		0.914
0.966	0.953	0.961	0.896		0.738
0.973	0.971	0.974	0.936		0.798
0.955	0.899	0.847			0.948
0.974	0.968	0.893			0.93
0.932	0.896	0.975			0.948
0.98	0.976	0.978			0.904
0.973	0.968	0.964			0.855
0.982	0.98	0.712			0.977
0.975	0.976	0.954			0.906
0.973	0.954	0.887
0.98	0.974	0.959
0.98	0.97	0.963
0.976	0.972	0.864
0.957	0.949	0.9
0.965	0.955	0.932
0.98	0.971	0.914
0.973	0.973	0.948
0.971	0.964	0.796
	0.969	0.975
	0.972
	0.974
0.907	0.974	0.972	0.956	0.931	0.868	0.871	0.968
0.937	0.971	0.972	0.966	0.927	0.903	0.939	0.706
0.952	0.979	0.971	0.887	0.909	0.78	0.879	0.829
0.956	0.91	0.925	0.965	0.936	0.877	0.892	0.716
0.974	0.975	0.856	0.972	0.96	0.928	0.95	0.892
0.974	0.975	0.969	0.964	0.881	0.91	0.935	0.959
0.938	0.972	0.9	0.961	0.851	0.974	0.875	0.968
0.955	0.966	0.952	0.916	0.904	0.939	0.867	0.954
0.916	0.958	0.9	0.97	0.885	0.868	0.975	0.876
0.946	0.972	0.531	0.974	0.847	0.954	0.95	0.925
0.979	0.947	0.971	0.923	0.87	0.889	0.939	0.928
0.979	0.974	0.942	0.921	0.724	0.807	0.963	0.891
0.978	0.971	0.965	0.969	0.886	0.864	0.898	0.835
0.932	0.974	0.973	0.882	0.872	0.846	0.885	0.932
0.943	0.939	0.969	0.935	0.844	0.881	0.906	0.872
0.979	0.932	0.969	0.941	0.86	0.877	0.906	0.896
0.966	0.842	0.927	0.963	0.854	0.822	0.939	0.954
0.973	0.971	0.969	0.963	0.977	0.912	0.944	0.657
0.949	0.889	0.959	0.945	0.959	0.909	0.908	0.938
0.952	0.975	0.926	0.977	0.968	0.958	0.884	0.891
0.925	0.931	0.982	0.973	0.761	0.864	0.94	0.928
0.95	0.963	0.92	0.897	0.943	0.96	0.916	0.85
0.977	0.916	0.909	0.935	0.838	0.918	0.949	0.818
0.96	0.859	0.975	0.979	0.928	0.899	0.93	0.831
0.97	0.634	0.975	0.933	0.804	0.816	0.903	0.846
0.949	0.97	0.972	0.974	0.937	0.816	0.978	0.953
0.978	0.976	0.971	0.968	0.854	0.89	0.823	0.972
0.975	0.846	0.852	0.968	0.952	0.904	0.939	0.959
0.971	0.954	0.873	0.908	0.932	0.958	0.952	0.902
0.981	0.882	0.966	0.912	0.846	0.904	0.937	0.872
0.981	0.84	0.967	0.96	0.915	0.945	0.92	0.794
0.967	0.948	0.95	0.953	0.912	0.961	0.955	0.969
0.891	0.974	0.969	0.965	0.896	0.855	0.912	0.837
0.964	0.91	0.867	0.885	0.902	0.841	0.941	0.796
0.955	0.969	0.931	0.959	0.966	0.922	0.911	0.942
0.979	0.944	0.958	0.926	0.949	0.919	0.965	0.927
0.915	0.942	0.974	0.967	0.901	0.951	0.972	0.878
0.978	0.948	0.871	0.894	0.92	0.9	0.95	0.805
0.981	0.981	0.925	0.959	0.735	0.914	0.881	0.873
0.904	0.961	0.958	0.819	0.847	0.948	0.86	0.839
0.959	0.971	0.967	0.882	0.935	0.896	0.866	0.797
0.923	0.956	0.958	0.947	0.945	0.92	0.885	0.963
0.962	0.974	0.975	0.858	0.938	0.819	0.885	0.968
0.951	0.931	0.974	0.974	0.869	0.902	0.837	0.872
0.973	0.969	0.899	0.879	0.856	0.974	0.911	0.875
0.975	0.974	0.975	0.962	0.967	0.801	0.869	0.936
0.947	0.959	0.973	0.956	0.872	0.854	0.907	0.9
0.971	0.979	0.95	0.905	0.94	0.846	0.885	0.862
0.967	0.973	0.963	0.955	0.854	0.883	0.951	0.952
0.963	0.933	0.933	0.975	0.89	0.895	0.964	0.973
0.953	0.974	0.947	0.968	0.929	0.854	0.941	0.9
0.946	0.965	0.955	0.957	0.963	0.892	0.883	0.893
0.974	0.933	0.762	0.944	0.832	0.784	0.968	0.923
0.948	0.97	0.959	0.937	0.958	0.94	0.92	0.891
0.978	0.964	0.979	0.901	0.954	0.91	0.89	0.935
0.971	0.947	0.965	0.941	0.971	0.943	0.768	0.972
0.974	0.971	0.887	0.928	0.934	0.844	0.621	0.865
0.901	0.973	0.906	0.964	0.919	0.955	0.891	0.837
0.979	0.964	0.979	0.96	0.776	0.97	0.922	0.974
0.968	0.957	0.901	0.934	0.82	0.938	0.953	0.963
0.98	0.943	0.913	0.918	0.954	0.925	0.976	0.815
0.973	0.962	0.96	0.926	0.939	0.918	0.759	0.747
0.934	0.943	0.962	0.96	0.903	0.912	0.943	0.86
0.971	0.967	0.906	0.966	0.924	0.956	0.973	0.813
0.914	0.974	0.976	0.967	0.941	0.912	0.909	0.971
0.97	0.964	0.972	0.974	0.922	0.949	0.873	0.899
0.97	0.974	0.946	0.957	0.86	0.888	0.932	0.829
0.98	0.937	0.959	0.948	0.901	0.939		0.828
0.893	0.974	0.974	0.871	0.954	0.961		0.945
0.972	0.979	0.975	0.957	0.793	0.928		0.902
0.962	0.966	0.969	0.972	0.94	0.936		0.817
0.963	0.977	0.97	0.966	0.917	0.9		0.96
0.946	0.969	0.963	0.974	0.917	0.965		0.952
0.957	0.969	0.974	0.939	0.872	0.903		0.864
0.964	0.965	0.941	0.963	0.955	0.878		0.934
0.97	0.968	0.827	0.955	0.901	0.955		0.966
0.964	0.975	0.957	0.964	0.89	0.977		0.935
0.927	0.97	0.938	0.962	0.892	0.894		0.924
0.97	0.947	0.95	0.895	0.96	0.931		0.951
0.973	0.976	0.889	0.968	0.861	0.904		0.911
0.906	0.964	0.971	0.955	0.829	0.882		0.856
0.967	0.962	0.921	0.964	0.872	0.973		0.94
0.96	0.962	0.914	0.945	0.956	0.93		0.909
0.968	0.956	0.958	0.676	0.866	0.913		0.908
0.972	0.974	0.952	0.926	0.922	0.9		0.967
0.966	0.855	0.925	0.97	0.956	0.948		0.967
0.971	0.939	0.973	0.85	0.962	0.94		0.824
0.967	0.962	0.939	0.936	0.869	0.901		0.975
0.968	0.969	0.969	0.937	0.883	0.816		0.779
0.967	0.977	0.898	0.951	0.873	0.909		0.926
0.971	0.961	0.944	0.97	0.878	0.81		0.961
0.969	0.946	0.871	0.965	0.81	0.876		0.963
0.933	0.948	0.956	0.97	0.818	0.895		0.973
0.967	0.971	0.934	0.967	0.957	0.917		0.846
0.976	0.977	0.97	0.97	0.911	0.941		0.847
0.975	0.976	0.931	0.974	0.824	0.95		0.826
0.974	0.973	0.978	0.973	0.876	0.88		0.966
0.978	0.949	0.887	0.905	0.887	0.906		0.935
0.968	0.892	0.898	0.971	0.908	0.898		0.762
0.973	0.934	0.939	0.958	0.916	0.915		0.897
0.979	0.971	0.894	0.969	0.896	0.972		0.756
0.98	0.899	0.858	0.976	0.838			0.86
0.973	0.952	0.858	0.924	0.892			0.977
0.981	0.971	0.933	0.959	0.957			0.941
0.963	0.938	0.952	0.958	0.946			0.94
0.973	0.977	0.97	0.953	0.946			0.802
0.938	0.975	0.963	0.963	0.959			0.78
0.881	0.965	0.933	0.904	0.807			0.974
0.971	0.952	0.966	0.97	0.903			0.949
0.959	0.978	0.789	0.886	0.795			0.892
0.974	0.953	0.976	0.951	0.932			0.847
0.968		0.977	0.921	0.889			0.904
0.951		0.915	0.961	0.915			0.916
		0.973	0.88	0.883			0.965
		0.97	0.944	0.901			0.861
			0.965	0.832			0.972
			0.965	0.879			0.899
			0.962	0.856			0.968
			0.912	0.908			0.911
			0.96	0.902			0.925
			0.952	0.96			0.928
			0.946	0.927			0.899
			0.919	0.94			0.8
			0.938	0.907			0.914
			0.837				0.94
			0.975				0.977
			0.92				0.771
			0.965				0.877
			0.781				0.923
			0.898				0.926
			0.969				0.974
			0.977				0.885
			0.967				0.968
			0.958				0.853
			0.962				0.95
			0.926				0.674
			0.968				0.945
			0.929				0.977
			0.97				0.92
			0.968				0.905
			0.973				0.942
			0.963				0.97
			0.909				0.977
			0.944				0.87
			0.967				0.909
			0.97				0.826
			0.895				0.869
			0.974				0.921
			0.976				0.832
			0.901				0.742
			0.951				0.877
			0.933				0.848
			0.95				0.963
			0.967				0.979
			0.944				0.975
							0.95
							0.978
							0.939
							0.948
							0.651
							0.891
							0.951
							0.856
							0.939
							0.861
							0.974
							0.906
							0.917
0.95	0.969	0.974	0.971	0.864	0.92	0.797	0.97
0.956	0.955	0.967	0.955	0.921	0.858	0.962	0.974
0.966	0.976	0.97	0.965	0.928	0.882	0.873	0.846
0.947	0.956	0.967	0.944	0.903	0.926	0.863	0.815
0.97	0.965	0.975	0.967	0.943	0.959	0.89	0.963
0.968	0.965	0.938	0.806	0.906	0.921	0.948	0.959
0.954	0.941	0.945	0.949	0.93	0.87	0.951	0.876
0.937	0.966	0.93	0.955	0.902	0.894	0.895	0.963
0.916	0.96	0.918	0.759	0.901	0.885	0.969	0.955
0.969	0.939	0.941	0.973	0.931	0.851	0.928	0.849
0.964	0.908	0.969	0.967	0.926	0.838	0.798	0.928
0.92	0.897	0.975	0.924	0.853	0.796	0.949	0.903
0.961	0.964	0.96	0.903	0.908	0.942	0.786	0.864
0.911	0.965	0.977	0.91	0.919	0.828	0.864	0.961
0.954	0.95	0.965	0.886	0.919	0.669	0.816	0.922
0.946	0.957	0.947	0.959	0.851	0.934	0.85	0.849
0.973	0.973	0.879	0.967	0.947	0.912	0.913	0.949
0.907	0.969	0.979	0.964	0.914	0.957	0.947	0.923
0.975	0.916	0.952	0.973	0.918	0.909	0.904	0.944
0.974	0.954	0.97	0.953	0.859	0.834	0.954	0.887
0.887	0.921	0.968	0.972	0.919	0.884	0.913	0.872
0.967	0.961	0.965	0.975	0.916	0.958	0.926	0.896
0.979	0.917	0.949	0.833	0.892	0.938	0.967	0.876
0.977	0.966	0.96	0.969	0.916	0.902	0.81	0.947
0.978	0.963	0.975	0.913	0.891	0.969	0.925	0.953
0.967	0.964	0.972	0.947	0.813	0.877	0.915	0.887
0.97	0.948	0.932	0.967	0.842	0.944	0.887	0.939
0.974	0.905	0.965	0.969	0.942	0.952	0.889	0.835
0.965	0.967	0.918	0.864	0.93	0.898	0.974	0.875
0.967	0.961	0.895	0.715	0.924	0.935	0.964	0.839
0.864	0.96	0.918	0.954	0.922	0.925	0.929	0.958
0.972		0.914	0.948	0.919	0.923	0.904	0.927
0.963		0.888	0.969	0.885	0.847	0.945	0.927
0.961		0.928	0.937	0.873	0.845	0.914	0.947
0.962		0.974	0.923	0.873	0.949	0.938	0.932
0.952		0.951	0.961	0.932	0.916	0.929	0.884
0.967		0.974	0.95	0.888	0.868	0.798	0.948
0.971		0.973	0.975	0.882	0.844	0.922	0.935
		0.977	0.977	0.911	0.965	0.785	0.92
		0.969	0.977	0.908	0.881	0.94	0.86
		0.962	0.965	0.904	0.891	0.957	0.97
		0.946	0.969	0.859	0.779	0.961	0.914
		0.932	0.976	0.895	0.922	0.916	0.917
		0.943	0.973	0.893	0.946	0.974	0.87
		0.975	0.93	0.847	0.946		0.9
		0.954	0.977	0.851	0.912
		0.959		0.808	0.94
		0.952		0.868	0.923
		0.834		0.951	0.88
		0.911		0.861	0.91
		0.824		0.897	0.952
		0.929		0.956	0.838
		0.971		0.926	0.907
		0.979		0.95	0.931
		0.919		0.905	0.887
		0.975		0.921	0.857
		0.967		0.878	0.86
		0.896		0.856	0.931
		0.926		0.929	0.916
		0.928		0.897	0.905
		0.957
		0.947
