# Supplementary material for: Pathogenic mutations in the chromokinesin KIF22 disrupt anaphase chromosome segregation
Source: eLife journal article supplement (doi:10.7554/elife.78653), 2022-06-22
Supplement: supp [file F6 Nocodazole Reversine.xlsx]

## Sheet: Sheet1
Pre-Mitosis						Post-Mitosis
GFP	KIF22-GFP	KIF22-GFP R149Q	KIF22-GFP V475G			GFP	KIF22-GFP	KIF22-GFP R149Q	KIF22-GFP V475G
0.949	0.938	0.946	0.914			0.866	0.914	0.95	0.881
0.963	0.94	0.958	0.92			0.947	0.913	0.954	0.91
0.954	0.878	0.956	0.935			0.941	0.869	0.948	0.943
0.945	0.944	0.953	0.944			0.908	0.905	0.822	0.91
0.953	0.947	0.92	0.945			0.899	0.936	0.818	0.955
0.948	0.961	0.906	0.959			0.939	0.95	0.917	0.928
0.942	0.95	0.953	0.953			0.96	0.968	0.937	0.93
0.942	0.942	0.945	0.965			0.92	0.918	0.926	0.925
0.946	0.952	0.947	0.958			0.966	0.938	0.898	0.937
0.96	0.941	0.944	0.938			0.899	0.964	0.947	0.959
0.966	0.964	0.943	0.927			0.97	0.928	0.937	0.934
0.954	0.956	0.946	0.964			0.949	0.949	0.948	0.885
0.961	0.945		0.936			0.946	0.946		0.936
0.968	0.93		0.943			0.967	0.944		0.814
0.959	0.944		0.945			0.959	0.935		0.949
0.935			0.942			0.937			0.937
0.952			0.933			0.951			0.929
0.933	0.954		0.958			0.931	0.815		0.921
0.956	0.949		0.937			0.966	0.951		0.945
0.892			0.956			0.849			0.862
0.951	0.95	0.953	0.944			0.95	0.948	0.954	0.956
0.929	0.974	0.957	0.952			0.921	0.956	0.876	0.943
0.929	0.954	0.932	0.951			0.935	0.933	0.95	0.967
0.937	0.938	0.954	0.936			0.891	0.919	0.948	0.902
0.943	0.944	0.962	0.955			0.832	0.943	0.956	0.95
	0.952	0.95	0.954				0.957	0.97	0.919
	0.977	0.962	0.953				0.904	0.942	0.956
	0.959	0.96	0.929				0.935	0.923	0.926
	0.934	0.956	0.957				0.942	0.939	0.932
	0.946	0.954	0.955				0.928	0.963	0.962
	0.943	0.973	0.949				0.945	0.933	0.908
	0.959	0.963	0.955				0.925	0.949	0.949
	0.948	0.937	0.96				0.933	0.866	0.97
	0.942	0.922	0.959				0.943	0.953	0.959
	0.958	0.941	0.954				0.942	0.837	0.955
	0.956	0.924					0.907	0.934
	0.937	0.931					0.936	0.886
	0.904	0.953					0.883	0.943
	0.931	0.935					0.9	0.92
		0.935						0.951
		0.953						0.965
		0.942						0.942
		0.95						0.949
		0.959						0.925
		0.944						0.959
		0.973						0.895
		0.955						0.96
		0.925						0.923
		0.935						0.939
		0.965						0.954
		0.944						0.89
		0.914						0.945
		0.939						0.942
		0.952						0.934
		0.96						0.936
		0.964						0.95
0.935	0.959	0.962	0.953			0.964	0.93	0.944	0.967
0.918	0.956	0.939	0.97			0.957	0.968	0.948	0.886
0.959	0.935	0.943	0.954			0.944	0.893	0.942	0.951
0.948	0.945	0.936	0.954			0.952	0.929	0.954	0.963
0.955	0.957	0.942	0.969			0.9	0.949	0.922	0.965
0.923	0.913	0.953	0.949			0.969	0.937	0.945	0.95
0.952	0.894	0.962	0.958			0.939	0.938	0.949	0.953
0.959	0.93	0.928	0.954			0.955	0.95	0.957	0.947
0.931	0.948	0.952	0.961			0.952	0.935	0.964	0.939
0.96	0.912	0.963	0.957			0.941	0.936	0.944	0.938
0.958	0.953	0.956	0.954			0.941	0.938	0.949	0.95
0.964	0.933	0.955	0.953			0.905	0.938	0.957	0.944
0.969	0.945	0.95	0.958			0.959	0.942	0.918	0.941
0.959	0.943	0.938	0.934			0.93	0.931	0.968	0.954
0.97	0.953	0.959	0.945			0.928	0.948	0.936	0.947
0.959	0.954	0.952	0.951			0.969	0.961	0.967	0.948
0.951	0.943	0.967	0.939			0.94	0.947	0.944	0.95
0.879	0.947	0.954	0.956			0.848	0.95	0.948	0.961
0.951	0.959	0.947	0.949			0.932	0.945	0.966	0.959
0.933	0.967	0.93	0.922			0.932	0.956	0.949	0.926
0.959	0.957	0.945	0.941			0.962	0.95	0.927	0.946
0.946	0.911	0.948	0.925			0.959	0.962	0.921	0.928
0.918	0.938	0.94	0.946			0.96	0.891	0.938	0.935
0.955	0.952	0.963	0.953			0.938	0.942	0.967	0.948
0.96		0.944	0.97			0.961		0.926	0.949
0.93		0.933	0.885			0.945		0.923	0.892
0.924		0.921	0.922			0.932		0.902	0.93
0.945		0.944	0.952			0.941		0.953	0.886
0.955			0.954			0.938			0.904
0.927			0.955			0.958			0.949
0.962			0.95			0.944			0.958
			0.96						0.916
