# Supplementary material for: Pathogenic mutations in the chromokinesin KIF22 disrupt anaphase chromosome segregation
Source: eLife journal article supplement (doi:10.7554/elife.78653), 2022-06-22
Supplement: supp [file F6 Nuclear Solidity.xlsx]

## Sheet: Sheet1
GFP + Control KD	GFP + KIF22 KD	WT + Control KD	WT + KIF22 KD	P148L + Control KD	P148L + KIF22 KD	P148S + Control KD	P148S + KIF22 KD	R149L + Control KD	R149L + KIF22 KD	R149Q + Control KD	R149Q + KIF22 KD	V475G + Control KD	V475G + KIF22 KD
0.957	0.962	0.964	0.954							0.94	0.934	0.964	0.943
0.957	0.948	0.959	0.953							0.856	0.958	0.961	0.942
0.946	0.944	0.958	0.95							0.89	0.941	0.962	0.957
0.935	0.961	0.95	0.961							0.919	0.89	0.958	0.964
0.944	0.943	0.965	0.967							0.937	0.932	0.916	0.958
0.954	0.962	0.956	0.963							0.957	0.937	0.935	0.88
0.948	0.958	0.962	0.953							0.939	0.853	0.94	0.967
0.918	0.861	0.97	0.961							0.902	0.845	0.915	0.931
0.93	0.965	0.967	0.962							0.897	0.953	0.946	0.947
0.936	0.758	0.96	0.959							0.905	0.708	0.963	0.926
0.951	0.953	0.968	0.951							0.92	0.96	0.968	0.958
0.936	0.957	0.965	0.953							0.934	0.9	0.957	0.945
0.93	0.963	0.92	0.962							0.934	0.923	0.902	0.891
0.95	0.968	0.956	0.968							0.759	0.963	0.944	0.892
0.961	0.965	0.959	0.944							0.93	0.956	0.967	0.906
0.96	0.954	0.952	0.962							0.952	0.96	0.946	0.897
0.922	0.971	0.964	0.952							0.918	0.885	0.943	0.93
0.952	0.965	0.954	0.962							0.888	0.921	0.963	0.829
0.876	0.97	0.96	0.959							0.874	0.943	0.923	0.944
0.895	0.968	0.965	0.951							0.944	0.923	0.964	0.943
0.963	0.972	0.97	0.953							0.886	0.911	0.862	0.952
0.941	0.963	0.966	0.957							0.952	0.918	0.969	0.904
0.901	0.955	0.965	0.951							0.925	0.919	0.949	0.933
0.964	0.978	0.965	0.949							0.903	0.928	0.96	0.935
0.945	0.959	0.951	0.961							0.886	0.947	0.965	0.955
0.957	0.962	0.951	0.962							0.881	0.945	0.918	0.957
0.956	0.968	0.957	0.953							0.856	0.922	0.92	0.959
0.95	0.971	0.967	0.955							0.878	0.827	0.923	0.899
0.956	0.975	0.965	0.964							0.938	0.868	0.835	0.936
0.949	0.972	0.965	0.962							0.938	0.912	0.871	0.971
0.939	0.968	0.953	0.946							0.867	0.932	0.968	0.749
0.954	0.963	0.959	0.961							0.904	0.925	0.955	0.931
0.941	0.967	0.954	0.94							0.933	0.963	0.819	0.932
0.959	0.963	0.96	0.971							0.927	0.928	0.858	0.962
0.956	0.966	0.924	0.951							0.957	0.941	0.874	0.925
0.954	0.967	0.93	0.943							0.897	0.906	0.901	0.853
0.957	0.918	0.964	0.959							0.958	0.921	0.907	0.906
0.943	0.97	0.97	0.955							0.963	0.908	0.838	0.953
0.946	0.93	0.973	0.963							0.919	0.891	0.931	0.874
0.965	0.963	0.976	0.939							0.829	0.878	0.798	0.939
0.966	0.958	0.973	0.959							0.927	0.939	0.883	0.943
0.977	0.961	0.96	0.959							0.902	0.869	0.961	0.953
0.963	0.961	0.965	0.963							0.946	0.94	0.89	0.848
0.973	0.963	0.959	0.962							0.954	0.902	0.933	0.848
0.952	0.97	0.964	0.956							0.868	0.917	0.96	0.968
0.964	0.96	0.967	0.953							0.843	0.899	0.964	0.975
0.97	0.965	0.914	0.975							0.899	0.923	0.946	0.966
0.954	0.965	0.955	0.967							0.951	0.931	0.972	0.898
0.951	0.972	0.944	0.953							0.913	0.891	0.951	0.934
0.95	0.957	0.952	0.952							0.965	0.945	0.916	0.904
0.963	0.964	0.964	0.958							0.944	0.927	0.948	0.973
0.96	0.964	0.958	0.966							0.879	0.886	0.866	0.973
0.961	0.934	0.965	0.944							0.708	0.957	0.942	0.957
0.963	0.963	0.949	0.951								0.965	0.899	0.952
0.962	0.958	0.96	0.942								0.969	0.954	0.923
0.972	0.964	0.954	0.941								0.859	0.946	0.932
0.97	0.969	0.969	0.965									0.881	0.963
0.973	0.954	0.96	0.969									0.961	0.944
0.962	0.961	0.945	0.974									0.965	0.931
0.961	0.953	0.963	0.952									0.941	0.956
0.969	0.962	0.94	0.979									0.965	0.938
0.973	0.959	0.913	0.962									0.889	0.916
	0.955	0.942	0.96									0.943	0.93
	0.945	0.928	0.96									0.794	0.955
	0.963	0.954	0.956									0.971	0.899
	0.919	0.962	0.964									0.97	0.92
	0.972	0.965	0.968									0.882	0.96
	0.969	0.96	0.962									0.932	0.921
	0.974	0.945	0.961									0.981	0.971
	0.976	0.951	0.909									0.979	0.968
	0.967	0.931	0.897									0.958	0.906
	0.965	0.963	0.964									0.909	0.943
	0.956	0.941	0.97									0.955	0.738
	0.965	0.96	0.959									0.94	0.918
	0.963	0.963	0.938									0.923	0.963
	0.974		0.951									0.974	0.953
	0.946											0.97	0.958
	0.97											0.946	0.966
	0.972											0.925	0.964
	0.96											0.973	0.888
	0.962											0.965	0.964
	0.968											0.923	0.957
	0.949											0.858	0.951
	0.957											0.917	0.969
	0.969											0.977	0.947
	0.95											0.883	0.955
	0.968											0.809	0.981
	0.964											0.791	0.962
	0.953											0.966	0.934
	0.953											0.926	0.948
	0.964											0.893	0.948
	0.958											0.887	0.952
	0.957											0.896	0.94
												0.953	0.948
												0.953	0.943
												0.894	0.939
												0.973	0.938
												0.941	0.928
												0.91	0.922
												0.864	0.951
												0.966
												0.905
												0.875
												0.86
												0.915
												0.972
												0.934
												0.979
												0.937
												0.95
												0.957
												0.963
												0.953
												0.976
												0.96
												0.907
												0.822
												0.959
												0.859
												0.966
												0.922
												0.964
												0.944
												0.95
												0.958
												0.726
												0.841
												0.962
												0.97
												0.947
												0.966
												0.904
												0.956
												0.942
												0.895
0.951	0.963	0.963	0.966							0.816	0.817	0.972	0.958
0.958	0.951	0.966	0.972							0.953	0.935	0.974	0.945
0.969	0.953	0.926	0.962							0.892	0.936	0.866	0.971
0.974	0.972	0.969	0.967							0.884	0.928	0.969	0.974
0.956	0.969	0.964	0.961							0.901	0.801	0.917	0.973
0.968	0.972	0.966	0.958							0.963	0.862	0.943	0.817
0.956	0.965	0.958	0.947							0.92	0.861	0.931	0.858
0.934	0.966	0.968	0.971							0.962	0.916	0.961	0.98
0.971	0.96	0.954	0.958							0.816	0.874	0.96	0.971
0.963	0.959	0.968	0.963							0.967	0.924	0.968	0.942
0.961	0.947	0.969	0.943							0.921	0.959	0.905	0.948
0.969	0.969	0.961	0.961							0.735	0.961	0.947	0.959
0.958	0.961	0.972	0.96							0.97	0.972	0.963	0.966
0.963	0.97	0.96	0.964							0.879	0.971	0.959	0.971
0.962	0.969	0.972	0.953							0.919	0.912	0.959	0.958
0.962	0.97	0.954	0.961							0.958	0.838	0.879	0.897
0.964	0.971	0.955	0.955							0.854	0.935	0.902	0.823
0.968	0.965	0.951	0.953							0.827	0.951	0.969	0.918
0.947	0.972	0.975	0.958							0.978	0.915	0.968	0.96
0.967	0.966	0.961	0.955							0.973	0.976	0.941	0.944
0.959	0.953	0.97	0.967							0.846	0.835	0.967	0.95
0.975	0.952	0.969	0.951							0.965	0.971	0.918	0.963
0.96	0.964	0.972	0.969							0.952	0.948	0.8	0.824
0.955	0.942	0.961	0.968							0.962	0.921	0.919	0.962
0.956	0.964	0.963	0.963							0.933	0.949	0.924	0.912
0.966	0.96	0.961	0.964							0.84	0.971	0.868	0.847
0.957	0.955	0.977	0.955							0.943	0.893	0.845	0.835
0.963	0.961	0.951	0.961							0.71	0.873	0.949	0.956
0.948	0.969	0.965	0.969							0.961	0.967	0.792	0.916
0.939	0.945	0.961	0.936							0.841	0.855	0.921	0.974
0.96	0.963	0.962	0.96							0.952	0.939	0.955	0.888
0.964	0.928	0.976	0.966							0.916	0.955	0.879	0.963
0.952	0.963	0.945	0.932							0.885	0.945	0.879	0.959
0.959	0.964	0.954	0.947							0.959	0.897	0.955	0.955
0.968	0.967	0.973	0.956							0.967	0.945	0.939	0.818
0.947	0.952	0.962	0.941							0.958	0.911	0.843	0.975
0.958	0.957	0.96	0.952							0.934	0.859	0.966	0.964
0.947	0.936	0.907	0.94							0.972	0.878	0.909	0.907
0.954	0.959	0.971	0.972							0.974	0.904	0.979	0.97
0.973	0.954	0.973	0.97							0.939	0.948	0.974	0.935
0.975	0.961	0.962	0.963							0.951	0.853	0.971	0.959
0.963	0.946	0.959	0.947							0.965	0.93	0.895	0.962
0.971	0.957	0.975	0.941							0.963	0.927	0.837	0.962
0.951	0.966	0.952	0.972							0.97	0.916	0.856	0.96
0.962	0.952	0.959	0.966							0.955	0.948	0.813	0.978
0.96	0.959	0.956	0.968							0.906	0.887	0.923	0.951
0.942	0.955	0.951	0.96							0.767	0.947	0.897	0.969
0.97	0.958	0.96	0.966							0.93	0.948	0.937	0.833
0.958	0.946	0.959	0.963							0.968	0.887	0.976	0.979
0.956	0.964	0.916	0.97							0.964	0.895	0.888	0.966
0.965	0.957	0.901	0.974							0.801	0.942	0.963	0.866
0.964	0.957	0.93	0.95							0.877	0.849	0.93	0.749
0.943	0.954	0.978	0.957							0.898	0.867	0.879	0.914
0.948	0.963	0.938	0.977							0.947	0.908	0.957	0.959
0.963	0.962	0.945	0.979							0.862	0.976	0.921	0.944
0.971	0.962	0.97	0.968							0.955	0.936	0.928	0.881
0.972	0.965	0.967	0.973							0.839	0.937	0.93	0.961
0.971	0.965	0.967	0.935							0.798	0.961	0.949	0.86
0.955	0.958	0.972	0.975							0.863	0.969	0.938	0.846
0.96	0.956	0.968	0.972							0.958	0.958	0.955	0.969
0.956	0.963	0.972	0.975							0.915	0.967	0.926	0.975
0.973	0.967	0.969	0.971							0.965	0.959	0.967	0.879
0.972	0.975	0.965	0.967							0.976	0.957	0.96	0.957
0.96	0.954	0.959	0.965							0.958	0.946	0.876	0.96
0.947	0.948	0.957	0.957							0.902	0.925	0.883	0.958
0.957	0.953	0.962	0.963							0.975	0.949	0.893	0.969
0.957	0.963	0.962	0.963							0.906	0.907	0.931	0.927
0.976	0.965	0.967	0.952							0.774	0.906	0.971	0.965
0.958	0.963	0.965	0.968							0.787	0.95	0.964	0.959
0.971	0.943	0.971	0.952							0.96	0.907	0.92	0.853
0.963	0.957	0.98	0.951							0.972	0.85	0.886	0.947
0.965	0.928	0.954	0.967							0.968	0.939	0.864	0.917
0.964	0.943	0.952	0.95							0.915	0.907	0.962	0.965
0.961	0.964	0.966	0.953							0.958	0.96	0.905	0.966
0.957	0.962	0.977	0.975							0.935	0.935	0.851	0.971
0.965	0.948	0.958	0.962							0.966	0.954	0.762	0.964
0.975	0.96	0.968	0.952							0.965	0.972	0.965	0.965
0.956	0.961	0.964	0.949							0.957	0.789	0.874	0.956
0.974	0.962	0.973	0.949							0.976	0.804	0.907	0.938
0.965	0.961	0.946	0.961							0.848	0.927	0.801	0.945
0.966	0.953	0.961	0.96							0.965	0.916	0.977	0.911
0.969	0.957	0.974	0.958							0.92	0.928	0.911	0.945
0.967	0.967	0.963	0.962							0.966	0.875	0.922	0.92
0.966	0.952	0.971	0.963							0.964	0.852	0.806	0.921
0.951	0.933	0.966	0.953							0.897	0.949	0.964	0.952
0.966	0.949	0.976	0.955							0.951	0.869	0.973	0.97
0.982	0.966	0.977	0.954							0.95	0.842	0.973	0.844
0.957	0.962	0.965	0.948							0.973	0.91	0.857	0.955
0.943	0.937	0.982	0.943							0.955	0.856	0.885	0.947
0.968	0.959	0.975	0.956							0.957	0.834	0.957	0.888
0.964	0.978	0.98	0.959							0.948	0.897	0.978	0.92
0.963	0.968	0.955	0.955							0.968	0.88	0.976	0.907
0.974	0.953	0.979	0.953							0.964	0.959	0.956	0.956
0.951	0.949	0.945	0.944							0.899	0.835	0.972	0.831
0.964	0.978	0.973	0.95							0.956	0.949	0.953	0.919
0.963	0.958	0.926	0.963							0.925	0.873	0.893	0.851
0.96	0.951	0.981	0.968							0.867	0.952	0.974	0.956
0.962	0.974	0.919	0.96							0.941	0.946	0.971	0.901
0.964	0.963	0.949	0.965							0.943	0.96	0.909	0.947
0.942	0.921	0.973	0.964							0.953	0.957	0.96	0.932
0.966	0.95	0.98	0.968							0.954	0.958	0.963	0.916
0.959	0.96	0.981	0.957							0.954	0.903	0.978	0.967
0.971	0.971	0.95	0.962							0.91	0.896	0.907	0.877
0.969	0.971	0.978	0.968							0.9	0.93	0.954	0.889
0.962	0.941	0.977	0.958							0.959	0.914	0.951	0.896
0.974	0.935	0.973	0.965							0.946	0.938	0.963	0.909
0.965	0.959	0.971	0.966							0.917	0.845	0.955	0.96
0.967	0.97	0.972	0.973							0.948	0.842	0.934	0.959
0.962	0.961	0.946	0.947							0.902	0.957	0.938	0.94
0.97	0.968	0.969	0.969							0.825	0.949	0.871	0.931
0.94	0.96	0.972	0.96							0.83	0.953	0.962	0.805
0.967	0.969	0.963	0.97							0.938	0.95	0.898	0.976
0.958	0.949	0.969	0.972							0.96	0.949	0.925	0.973
0.955	0.968	0.974	0.961							0.969	0.954	0.975	0.965
0.97	0.969	0.97	0.966							0.849	0.961	0.939	0.94
0.975	0.961	0.974	0.958							0.95	0.942	0.884	0.904
0.964	0.955	0.948	0.969							0.936	0.857	0.841	0.955
0.974	0.955	0.906	0.959							0.905	0.879	0.976	0.928
0.967	0.961	0.953	0.964							0.878	0.907	0.928	0.924
0.968	0.952	0.968	0.964							0.857	0.938	0.969	0.884
0.957	0.97	0.968	0.933							0.863	0.943	0.976	0.938
0.976	0.953	0.968	0.972							0.96	0.957	0.862	0.917
0.961	0.955	0.97	0.957							0.947	0.957	0.916	0.962
0.964	0.964	0.966	0.95							0.958	0.816	0.954	0.893
0.966	0.968	0.977	0.972							0.963	0.945	0.934	0.945
0.968	0.967	0.973	0.977							0.962	0.951	0.931	0.84
0.964	0.973	0.941	0.957							0.937	0.948	0.956	0.93
0.958	0.971	0.958	0.961							0.955	0.912	0.978	0.913
0.966	0.973	0.954	0.959							0.958	0.931	0.927	0.884
0.963	0.959	0.95	0.932							0.86	0.913	0.789	0.952
0.965	0.956	0.948	0.931							0.943	0.914	0.922	0.937
0.962	0.97	0.949	0.902							0.839	0.956	0.913	0.838
0.931	0.954	0.954	0.904							0.847	0.851	0.979	0.967
0.973	0.955	0.956	0.96							0.952	0.917	0.967	0.953
0.971	0.96	0.954	0.974							0.873	0.779	0.951	0.918
0.975	0.962	0.954	0.971							0.806	0.952	0.972	0.913
0.957	0.976	0.955	0.971							0.883	0.969	0.965	0.922
0.963	0.97	0.951	0.976							0.962	0.906	0.948	0.954
0.971	0.958	0.947	0.966							0.843	0.841	0.953	0.902
0.973	0.972	0.939								0.803	0.885	0.931	0.964
0.96	0.962	0.97	0.949							0.915	0.938	0.933	0.918
0.964	0.953	0.959	0.954							0.93	0.798	0.968	0.954
0.954	0.957	0.951	0.965							0.974	0.921	0.947	0.821
0.97	0.957	0.935	0.954							0.809	0.977	0.917	0.964
0.979	0.951	0.949	0.955							0.867	0.968	0.942	0.942
0.969	0.97	0.961	0.956							0.922	0.839	0.901	0.929
0.967	0.97	0.956	0.968							0.883	0.882	0.917	0.972
0.969	0.97	0.958	0.965							0.947	0.856	0.865	0.905
0.977	0.909	0.953	0.938							0.946	0.932	0.964	0.965
0.961	0.956	0.938	0.954							0.973	0.79	0.932	0.965
0.95	0.96	0.952	0.95							0.913	0.953	0.958	0.964
0.976	0.932	0.952	0.933							0.896	0.955	0.962	0.962
0.958	0.963	0.934	0.953							0.942	0.916	0.784	0.937
0.959	0.96	0.96	0.954							0.906	0.976	0.966	0.958
0.943	0.932	0.955	0.939							0.923	0.957	0.963	0.875
0.974	0.963	0.954	0.949							0.913	0.866	0.852	0.956
0.941	0.968	0.953	0.943							0.86	0.805	0.893	0.962
0.969	0.962	0.954	0.93							0.935	0.91	0.88	0.967
0.967	0.977	0.957	0.942							0.774	0.958	0.968	0.978
0.976	0.972	0.957	0.946							0.932	0.954	0.819	0.971
0.968	0.958	0.967	0.954							0.788	0.927	0.926	0.851
0.97	0.973	0.949	0.946							0.905	0.808	0.962	0.902
0.975	0.967	0.971	0.954							0.951	0.793	0.961	0.948
0.953	0.97	0.949	0.964							0.972	0.815	0.972	0.906
0.978	0.952	0.954	0.951							0.861	0.956	0.971	0.954
0.972	0.962	0.967	0.967							0.951	0.948	0.937	0.896
0.974	0.975	0.952	0.954							0.967	0.807	0.914	0.933
0.975	0.972	0.858	0.958							0.95	0.855	0.958	0.972
0.963	0.972	0.968	0.971							0.91	0.899	0.963	0.968
0.967	0.966	0.958	0.952							0.888	0.952	0.795	0.912
0.971	0.949	0.972	0.971							0.959	0.951	0.961	0.955
0.974	0.963	0.971	0.963							0.939	0.919	0.956	0.872
0.966	0.957	0.955	0.96							0.965	0.955	0.972	0.951
0.948	0.962	0.971	0.948							0.94	0.96	0.972	0.853
0.943	0.955	0.961	0.96							0.958	0.843	0.955	0.914
0.952	0.975	0.962	0.972							0.949	0.96	0.97	0.962
0.968	0.975	0.9	0.957							0.961	0.832	0.966	0.922
0.978	0.96	0.958	0.874							0.828	0.974	0.97	0.972
0.973	0.927	0.946	0.967							0.845	0.956	0.938	0.886
0.978	0.971	0.961	0.971							0.95	0.94	0.94	0.956
0.968	0.97	0.906	0.972							0.803	0.978	0.92	0.948
0.953	0.823	0.953	0.964							0.973	0.96	0.974	0.919
0.967	0.951	0.934	0.964							0.851	0.855	0.976	0.97
0.963	0.966	0.964	0.978							0.962	0.947	0.943	0.917
0.964	0.97	0.976	0.979							0.944	0.949	0.975	0.821
0.965	0.969	0.974	0.977							0.863	0.974	0.865	0.883
0.974	0.965	0.94	0.976							0.927	0.95	0.926	0.96
0.975	0.968	0.952	0.973							0.903	0.932	0.958	0.937
0.951	0.971	0.94	0.972							0.809	0.864	0.828	0.91
0.946	0.974	0.962	0.978							0.92	0.907	0.955	0.932
0.971	0.965	0.968	0.977							0.794	0.896	0.964	0.959
0.975	0.952	0.941	0.978							0.769	0.951	0.846	0.97
0.976	0.975	0.958	0.976							0.961	0.963	0.883	0.962
0.95	0.911	0.959	0.966							0.937	0.975	0.949	0.962
0.979	0.965	0.971	0.975							0.729	0.791	0.951	0.954
0.974	0.968	0.977	0.971							0.888	0.907	0.956	0.921
0.958	0.972	0.969	0.975							0.967	0.963	0.966	0.97
0.971	0.972	0.974	0.977							0.894	0.972	0.951	0.946
0.966	0.963	0.958	0.96							0.951	0.919	0.944	0.915
0.974	0.964	0.966	0.972							0.963	0.89	0.97	0.964
0.977	0.955	0.966	0.957							0.818	0.972	0.901	0.913
0.968	0.972	0.959	0.874							0.956	0.948	0.972	0.902
0.96	0.929	0.961	0.967							0.946	0.977	0.886
0.973	0.974	0.968	0.971							0.874	0.966	0.91
0.977	0.95	0.956	0.972							0.841	0.965	0.877
0.974	0.966	0.938	0.964							0.909		0.853
0.964	0.973	0.96	0.964							0.891		0.847
0.961	0.949	0.965	0.978							0.973		0.964
0.972	0.967	0.954	0.979							0.889		0.931
0.947	0.928	0.954	0.977							0.971		0.927
0.974	0.964	0.978	0.976							0.971		0.957
0.971	0.96	0.977	0.973							0.861		0.826
0.971	0.964	0.977	0.972							0.956		0.937
0.974	0.966	0.979	0.978							0.823		0.957
0.971	0.961	0.972	0.977							0.865		0.935
0.965	0.963	0.981	0.978							0.881		0.926
0.955	0.962	0.975	0.976							0.84		0.881
0.976	0.971	0.975	0.966							0.869		0.917
0.976	0.937	0.981	0.975							0.886		0.96
0.975	0.959	0.973	0.971							0.974		0.913
0.964	0.971	0.98	0.975							0.98		0.961
0.96	0.976	0.975	0.978							0.872		0.966
0.968	0.965	0.967	0.98							0.93		0.948
0.953	0.959	0.972	0.979							0.959		0.951
0.968	0.956	0.98	0.973							0.83		0.938
0.959	0.959	0.975	0.961							0.953		0.926
0.961	0.963	0.975	0.977							0.959		0.855
0.961	0.961	0.976	0.963							0.952		0.968
0.957	0.972	0.97	0.979							0.863		0.826
0.954	0.974	0.96	0.969							0.966		0.848
0.96	0.967	0.956	0.968							0.817		0.799
0.967	0.921	0.978	0.977							0.96		0.917
0.96	0.964	0.971	0.949							0.949		0.965
0.968	0.953	0.979	0.976							0.823		0.961
0.955	0.938	0.966	0.97							0.965		0.924
0.963	0.961	0.973	0.979							0.956		0.856
0.972	0.973	0.947	0.976							0.966		0.856
0.979	0.968	0.944	0.967							0.929		0.914
0.954	0.955	0.971	0.968							0.923		0.969
0.969	0.964	0.972	0.972							0.965		0.973
0.965	0.955	0.944	0.965							0.946		0.895
0.97	0.972	0.956	0.969							0.921		0.959
0.965	0.96	0.942	0.931							0.856		0.935
0.973	0.95	0.963	0.903							0.938		0.973
0.971	0.959	0.966	0.942							0.935		0.83
0.967	0.969	0.96	0.982							0.969		0.968
0.944	0.965	0.961	0.969							0.784		0.948
0.964	0.959	0.972	0.934							0.934		0.96
0.889	0.969	0.966	0.944							0.922		0.952
0.972	0.965	0.97	0.936							0.91		0.952
0.976	0.961	0.973	0.969							0.907		0.959
0.967	0.959	0.955	0.967							0.969		0.755
0.973	0.969	0.956	0.964							0.972		0.911
0.94	0.955	0.967	0.945							0.975		0.95
0.954	0.959	0.916	0.967							0.957		0.967
0.964	0.977	0.958	0.981							0.928		0.926
0.974	0.956	0.932	0.969							0.969		0.736
0.968	0.97	0.968	0.977							0.963		0.898
0.966	0.969	0.966	0.963							0.972		0.953
0.974	0.975	0.926	0.959							0.899		0.955
0.979	0.97	0.967	0.982							0.967		0.896
0.966	0.956	0.97	0.965							0.951		0.946
0.973	0.947	0.973	0.957							0.91		0.909
0.975	0.969	0.934	0.961							0.894		0.843
0.978	0.957	0.957	0.964							0.949		0.927
0.972	0.953	0.951	0.973							0.959		0.831
0.974	0.957	0.961	0.98							0.847		0.718
0.977	0.935	0.952	0.974							0.927		0.927
0.964	0.94	0.964	0.968							0.864		0.873
0.964	0.959	0.959	0.985							0.958		0.889
0.971	0.954	0.944	0.968							0.895		0.972
0.975	0.95	0.952	0.971							0.819		0.975
0.971	0.939	0.93	0.949							0.919		0.78
0.971	0.969	0.948	0.967							0.971		0.848
0.972	0.968	0.97	0.971							0.963		0.921
0.969	0.963	0.969	0.976							0.962		0.89
0.969	0.963	0.948	0.964							0.948		0.972
0.967	0.965	0.957	0.956							0.941		0.928
0.961	0.969	0.967	0.975							0.935		0.885
0.956	0.964	0.964	0.953							0.966		0.966
0.954	0.965	0.949	0.979							0.887		0.893
0.931	0.971	0.957	0.967							0.957		0.964
0.94	0.974	0.952	0.96							0.965		0.78
0.961	0.972	0.952	0.957							0.92		0.862
0.963	0.965	0.957	0.946							0.96		0.974
0.961	0.969	0.951	0.969									0.943
0.951	0.972	0.97	0.972									0.919
0.97	0.962	0.914	0.968									0.951
0.969	0.937	0.964	0.972									0.974
0.961	0.959	0.973	0.969									0.956
0.956	0.95	0.946	0.957									0.974
0.96	0.956	0.947	0.974									0.85
0.97	0.945	0.952	0.958									0.963
0.968	0.937	0.962	0.963									0.968
0.951	0.97	0.937	0.974									0.954
0.966	0.95	0.947	0.964									0.961
0.973	0.965	0.971	0.966									0.973
0.958	0.952	0.968	0.913									0.696
0.968	0.951	0.961	0.964									0.899
0.978	0.93	0.96	0.969									0.957
0.972	0.955	0.968	0.966									0.836
0.966	0.965	0.966	0.976									0.846
	0.957	0.965	0.96									0.861
	0.928	0.965	0.967									0.973
		0.939	0.966									0.922
		0.915	0.952									0.869
		0.964	0.958									0.94
		0.967	0.957									0.863
		0.94	0.972									0.792
		0.972	0.974									0.956
		0.958	0.966									0.967
		0.973	0.939									0.934
		0.958	0.957									0.956
			0.975									0.819
			0.955									0.968
			0.958									0.788
			0.971									0.96
			0.977									0.956
			0.949									0.815
			0.96									0.885
			0.975									0.919
			0.97									0.966
			0.974									0.943
			0.97									0.825
			0.976									0.967
			0.971									0.939
			0.968									0.966
			0.967									0.972
			0.965									0.87
			0.966									0.924
												0.951
												0.961
												0.875
												0.971
												0.961
												0.961
												0.977
												0.951
												0.946
												0.912
												0.944
												0.898
												0.959
												0.862
												0.933
												0.968
												0.971
												0.886
												0.968
												0.979
												0.978
												0.958
												0.943
												0.961
0.975	0.961	0.973	0.968							0.957	0.959	0.976	0.874
0.97	0.976	0.959	0.963							0.873	0.953	0.822	0.951
0.954	0.966	0.969	0.967							0.824	0.916	0.971	0.957
0.949	0.966	0.974	0.949							0.971	0.95	0.907	0.971
0.97	0.969	0.972	0.974							0.878	0.918	0.888	0.964
0.968	0.969	0.96	0.976							0.907	0.956	0.976	0.975
0.966	0.963	0.971	0.973							0.899	0.958	0.954	0.889
0.979	0.965	0.973	0.973							0.916	0.937	0.974	0.932
0.97	0.974	0.948	0.974							0.86	0.964	0.955	0.939
0.979	0.974	0.976	0.966							0.948	0.959	0.822	0.971
0.971	0.973	0.961	0.971							0.955	0.878	0.954	0.873
0.965	0.973	0.974	0.967							0.936	0.952	0.932	0.876
0.968	0.972	0.952	0.97							0.961	0.826	0.944	0.971
0.973	0.816	0.965	0.971							0.97	0.879	0.951	0.974
0.975	0.965	0.948	0.959							0.883	0.909	0.952	0.779
0.979	0.972	0.968	0.967							0.914	0.952	0.969	0.951
0.975	0.975	0.974	0.959							0.812	0.936	0.915	0.922
0.976	0.973	0.972	0.96							0.783	0.966	0.949	0.922
0.958	0.973	0.973	0.975							0.967	0.953	0.892	0.94
0.969	0.975	0.964	0.966							0.964	0.952	0.955	0.942
0.969	0.975	0.97	0.967							0.968	0.934	0.972	0.873
0.974	0.976	0.968	0.976							0.964	0.959	0.927	0.921
0.973	0.967	0.972	0.977							0.969	0.958	0.951	0.918
0.962	0.969	0.969	0.969							0.951	0.955	0.851	0.872
0.972	0.965	0.973	0.958							0.914	0.853	0.76	0.906
0.965	0.974	0.98	0.964							0.938	0.963	0.96	0.943
0.963	0.972	0.977	0.973							0.964	0.863	0.959	0.859
0.978	0.967	0.976	0.944							0.976	0.966	0.913	0.966
0.973	0.962	0.973	0.967							0.96	0.917	0.938	0.955
0.968	0.975	0.971	0.959							0.969	0.834	0.933	0.969
0.976	0.968	0.932	0.963							0.96	0.932	0.883	0.965
0.97	0.954	0.974	0.969							0.963	0.896	0.942	0.963
0.98	0.957	0.965	0.952							0.946	0.959	0.945	0.954
0.978	0.951	0.953	0.969							0.929	0.966	0.917	0.957
0.962	0.972	0.947	0.97							0.971	0.871	0.779	0.935
0.976	0.977	0.962	0.969							0.908	0.957	0.97	0.959
0.975	0.948	0.931	0.959							0.891	0.936	0.966	0.959
0.97	0.978	0.967	0.973							0.969	0.833	0.91	0.969
0.971	0.966	0.941	0.973							0.808	0.952	0.926	0.922
0.968	0.953	0.96	0.972							0.907	0.922	0.899	0.957
0.976	0.969	0.945	0.957							0.91	0.941	0.853	0.913
0.971	0.97	0.971	0.952							0.899	0.949	0.954	0.947
0.97	0.968	0.959	0.975							0.875	0.959	0.92	0.926
0.971	0.976	0.954	0.964							0.971	0.869	0.786	0.9
0.966	0.971	0.961	0.958							0.967	0.967	0.946	0.959
0.978	0.973	0.969	0.964							0.824	0.963	0.955	0.947
0.975	0.961	0.919	0.956							0.95	0.965	0.925	0.962
0.965	0.964	0.942	0.974							0.816	0.962	0.878	0.958
0.976	0.969	0.937	0.971							0.919	0.971	0.964	0.95
0.973	0.958	0.966	0.973							0.974	0.953	0.966	0.956
0.935	0.971	0.951	0.968							0.83	0.961	0.971	0.82
0.976	0.968	0.962	0.971							0.954	0.972	0.803	0.847
0.962	0.96	0.937	0.96							0.886	0.955	0.972	0.918
0.959	0.972	0.966	0.975							0.885	0.974	0.891	0.963
0.967	0.972	0.971	0.955							0.896	0.949	0.914	0.95
0.959	0.961	0.95	0.977							0.928	0.963	0.961	0.908
0.971	0.97	0.949	0.976							0.948	0.961	0.873	0.951
0.974	0.966	0.968	0.975							0.895	0.96	0.965	0.958
0.974	0.974	0.973	0.981							0.888	0.813	0.964	0.947
0.977	0.973	0.97	0.976							0.97	0.91	0.954	0.955
0.971	0.944	0.972	0.969							0.962	0.874	0.969	0.955
0.977	0.958	0.969	0.945							0.673	0.939	0.869	0.965
0.967	0.976	0.955	0.977							0.957	0.952	0.901	0.95
0.977	0.962	0.966	0.953							0.897	0.953	0.871	0.939
0.977	0.973	0.973	0.975							0.94	0.976	0.822	0.864
0.976	0.969	0.974	0.97							0.824	0.937	0.965	0.901
0.972	0.96	0.969	0.974							0.964	0.975	0.848	0.917
0.965	0.94	0.973	0.975							0.966	0.979	0.964	0.927
0.963	0.943	0.969	0.973							0.901	0.957	0.964	0.947
0.974	0.961	0.925	0.975							0.973	0.963	0.964	0.931
0.969	0.963	0.968	0.979							0.858	0.955	0.904	0.893
0.957	0.968	0.961	0.954							0.804	0.965	0.964	0.972
0.966	0.969	0.977	0.964							0.961	0.953	0.9	0.967
0.977	0.968	0.965	0.964							0.97	0.944	0.858	0.919
0.971	0.958	0.953	0.956							0.887	0.931	0.817	0.941
0.972	0.967	0.97	0.972							0.744	0.941	0.96	0.953
0.979	0.959	0.963	0.931							0.941	0.966	0.874	0.829
0.978	0.968	0.972	0.957							0.833	0.959	0.921	0.96
0.974	0.975	0.957	0.94							0.753	0.899	0.948	0.878
0.974	0.98	0.966	0.928							0.833	0.911	0.955	0.947
0.969	0.978	0.963	0.945							0.949	0.964	0.954	0.928
0.957	0.958	0.965	0.915							0.954	0.964	0.959	0.911
0.971	0.979	0.95	0.97							0.972	0.94	0.956	0.947
0.969	0.973	0.967	0.968							0.969	0.93	0.941	0.905
0.971	0.958	0.97	0.972							0.965	0.958	0.909
0.978	0.968	0.966	0.975							0.965	0.949	0.883
0.969	0.963	0.968	0.978							0.951	0.936	0.949
0.974	0.973	0.976	0.972							0.971	0.926	0.821
0.967	0.964	0.943	0.966							0.974	0.952	0.815
0.971	0.962	0.979	0.944							0.971	0.893	0.92
0.969	0.972	0.976	0.967							0.972	0.965	0.871
0.974	0.961	0.969	0.978							0.782	0.955	0.905
0.966	0.971	0.973	0.961							0.828	0.942	0.93
0.969	0.935	0.946	0.976							0.963	0.953	0.935
0.974	0.972	0.965	0.975							0.855	0.919	0.9
0.978	0.967	0.946	0.967							0.93	0.947	0.895
0.979	0.967	0.979	0.975							0.894	0.93	0.868
0.975	0.96	0.972	0.959							0.971	0.914	0.923
0.966	0.975	0.97	0.961							0.889		0.93
0.949	0.958		0.968							0.829		0.966
0.969			0.974							0.884		0.895
0.969			0.977							0.97		0.91
0.946			0.971							0.975		0.969
0.947			0.975							0.862		0.961
0.971			0.976							0.976		0.947
0.965			0.97							0.975		0.95
0.964			0.925							0.977		0.956
0.966										0.933		0.961
0.966										0.894		0.89
0.963										0.765		0.965
0.961										0.803		0.953
0.973										0.961		0.973
0.958										0.85		0.951
0.967										0.936		0.889
0.953										0.953		0.925
0.965										0.909		0.964
0.963										0.957
0.972										0.769
0.97										0.937
0.949										0.866
0.96										0.97
										0.905
										0.974
										0.972
										0.802
										0.897
										0.838
										0.974
0.944	0.931	0.973	0.973	0.957	0.966	0.929	0.932	0.945	0.901
0.961	0.954	0.957	0.942	0.955	0.946	0.941	0.932	0.956	0.972
0.962	0.963	0.932	0.968	0.962	0.89	0.959	0.95	0.936	0.947
0.956	0.939	0.97	0.959	0.965	0.716	0.972	0.933	0.916	0.927
0.972	0.962	0.965	0.941	0.934	0.784	0.94	0.904	0.92	0.748
0.973	0.948	0.97	0.942	0.919	0.76	0.967	0.919	0.765	0.898
0.976	0.968	0.964	0.959	0.907	0.792	0.918	0.946	0.931	0.848
0.969	0.978	0.97	0.971	0.926	0.886	0.8	0.963	0.865	0.854
0.97	0.95	0.952	0.966	0.875	0.861	0.969	0.916	0.814	0.95
0.974	0.95	0.962	0.941	0.849	0.961	0.971	0.796	0.845	0.841
0.964	0.974	0.96	0.948	0.937	0.916	0.867	0.964	0.868	0.924
0.963	0.966	0.973	0.969	0.815	0.908	0.94	0.96	0.945	0.954
0.958	0.973	0.971	0.969	0.849	0.852	0.771	0.944	0.868	0.931
0.961	0.945	0.973	0.956	0.813	0.928	0.963	0.852	0.69	0.93
0.964	0.975	0.962	0.966	0.858	0.892	0.924	0.92	0.951	0.915
0.969	0.975	0.953	0.974	0.938	0.954	0.947	0.893	0.93	0.845
0.954	0.969	0.955	0.928	0.902	0.934	0.94	0.959	0.955	0.941
0.955	0.979	0.968	0.972	0.932	0.864	0.845	0.956	0.94	0.947
0.969	0.964	0.956	0.962	0.876	0.952	0.784	0.922	0.818	0.928
0.954	0.953	0.955	0.97	0.956	0.826	0.848	0.923	0.947	0.83
0.953	0.957	0.933	0.964	0.841	0.961	0.954	0.808	0.932	0.946
0.969	0.967	0.959	0.953	0.876	0.924	0.898	0.789	0.928	0.9
0.944	0.976	0.963	0.972	0.947	0.896	0.765	0.884	0.702	0.909
0.964	0.966	0.964	0.947	0.912	0.977	0.865	0.863	0.906	0.939
0.957	0.964	0.953	0.951	0.891	0.942	0.973	0.881	0.926	0.89
0.969	0.974	0.966	0.969	0.895	0.805	0.96	0.882	0.869	0.96
0.967	0.968	0.938	0.97	0.82	0.904	0.966	0.949	0.815	0.954
0.966	0.963	0.962	0.961	0.83	0.866	0.948	0.934	0.89	0.944
0.931	0.972	0.935	0.968	0.884	0.957	0.973	0.891	0.953	0.781
0.964	0.97	0.959	0.943	0.933	0.956	0.902	0.969	0.938	0.956
0.97	0.962	0.963	0.961	0.917	0.886	0.963	0.943	0.873	0.961
0.962	0.963	0.968	0.971	0.792	0.856	0.871	0.913	0.778	0.965
0.96	0.964	0.951	0.972	0.944	0.927	0.869	0.878	0.959	0.95
0.959	0.976	0.953	0.951	0.864	0.947	0.85	0.833	0.929	0.968
0.967	0.974	0.954	0.959	0.93	0.876	0.954	0.953	0.813	0.961
0.961	0.976	0.966	0.976	0.907	0.95	0.824	0.969	0.879	0.95
0.972	0.973	0.967	0.974	0.889	0.829	0.949	0.96	0.805	0.903
0.947	0.961	0.963	0.936	0.923	0.875	0.744	0.967	0.735	0.902
0.962	0.973	0.96	0.969	0.779	0.96	0.929	0.874	0.921	0.905
0.945	0.953	0.958	0.872	0.917	0.938	0.943	0.906	0.962	0.91
0.947	0.972	0.949	0.968	0.934	0.923	0.88	0.965	0.782	0.939
0.955	0.948	0.972	0.943	0.899	0.921	0.784	0.918	0.938	0.906
0.965	0.976	0.969	0.975	0.93	0.939	0.912	0.89	0.75	0.733
0.968	0.976	0.963	0.966	0.785	0.944	0.801	0.941	0.95	0.943
0.956	0.916	0.967	0.967	0.953	0.861	0.877	0.955	0.931	0.928
0.964	0.843	0.958	0.945	0.926	0.978	0.831	0.944	0.93	0.971
0.97	0.953	0.945	0.966	0.918	0.93	0.91	0.964	0.916	0.934
0.962	0.944	0.968	0.973	0.678	0.976	0.805	0.957	0.973	0.932
0.965	0.946	0.971	0.966	0.955	0.96	0.844	0.894	0.915	0.841
0.97	0.954	0.955	0.954	0.904	0.844	0.776	0.969	0.93	0.963
0.97	0.953	0.921	0.963	0.955	0.924	0.858	0.945	0.962	0.92
0.964	0.93	0.949	0.962	0.951	0.935	0.785	0.945	0.843	0.956
0.972	0.962	0.952	0.946	0.859	0.915	0.965	0.96	0.965	0.942
0.937	0.97	0.952	0.966	0.866	0.908	0.841	0.966	0.951	0.96
0.945	0.959	0.924	0.837	0.932	0.911	0.81	0.898	0.937	0.956
0.92	0.96	0.935	0.965	0.836	0.936	0.916	0.959	0.95	0.951
0.967	0.931	0.946	0.938	0.964	0.959	0.792	0.967	0.922	0.924
0.961	0.939	0.954	0.976	0.897	0.921	0.916	0.859	0.91	0.932
0.969	0.96	0.953	0.962	0.94	0.901	0.953	0.84	0.952	0.947
0.955	0.956	0.96	0.965	0.957	0.922	0.858	0.865	0.925	0.904
0.958	0.951	0.964	0.956	0.836	0.954	0.947	0.901	0.948	0.941
0.966	0.971	0.968	0.962	0.965	0.936	0.943	0.94	0.931	0.948
0.962	0.962	0.949	0.969	0.951	0.963	0.937	0.911	0.947	0.932
0.943	0.969	0.945	0.931	0.972	0.928	0.951	0.977	0.943	0.949
0.959	0.955	0.957	0.956	0.767	0.958	0.955	0.87	0.649	0.945
0.967	0.899	0.897	0.967	0.903	0.961	0.959	0.935	0.946	0.938
0.974	0.932	0.949	0.935	0.966	0.912	0.934	0.862	0.903	0.919
0.97	0.966	0.937	0.965	0.911	0.909	0.948	0.953	0.924	0.966
0.943	0.961	0.94	0.943	0.933	0.971	0.959	0.797	0.962	0.925
0.958	0.976	0.949	0.927	0.796	0.933	0.947	0.967	0.96	0.744
0.96	0.868	0.956	0.962	0.822	0.963	0.961	0.955	0.94	0.954
0.96	0.908	0.955	0.948	0.87	0.832	0.944	0.964	0.952	0.788
0.95	0.893	0.959	0.96	0.964	0.919	0.842	0.943	0.938	0.819
0.96	0.966	0.963	0.966	0.917	0.966	0.916	0.951	0.932	0.946
0.967	0.962	0.945	0.955	0.958	0.805	0.844	0.85	0.948	0.935
0.943	0.966	0.941	0.895	0.942	0.817	0.912	0.954	0.918	0.951
0.963	0.954	0.956	0.971	0.929	0.973	0.887	0.953	0.909	0.81
0.949	0.971	0.957	0.943	0.966	0.846	0.899	0.82	0.934	0.926
0.957	0.934	0.951	0.962	0.889	0.946	0.925	0.955	0.917	0.909
0.96	0.973	0.939	0.972	0.879	0.973	0.921	0.957	0.94	0.929
0.959	0.95	0.961	0.957	0.915	0.855	0.965	0.956	0.893	0.956
0.95	0.964	0.938	0.935	0.751	0.882	0.966	0.893	0.863	0.92
0.949	0.932	0.955	0.959	0.971	0.862	0.967	0.873	0.922	0.907
0.95	0.946	0.956	0.957	0.85	0.975	0.952	0.904	0.952	0.959
0.959	0.968	0.946	0.931	0.815	0.917	0.964	0.841	0.938	0.94
0.955	0.951	0.956	0.947	0.809	0.81	0.973	0.931	0.791	0.936
0.957	0.958	0.957	0.962	0.886	0.974	0.968	0.957	0.92	0.928
0.964	0.967	0.928	0.906	0.746	0.926	0.958	0.941	0.953	0.94
0.948	0.968	0.948	0.937	0.892	0.862	0.954	0.962	0.896	0.692
0.886	0.922	0.937	0.962	0.878	0.973	0.838	0.897	0.8	0.938
0.949	0.969	0.965	0.958	0.968	0.977	0.964	0.854	0.917	0.97
0.955	0.971	0.96	0.912	0.96	0.859	0.958	0.834	0.914	0.922
0.967	0.956	0.962	0.97	0.851	0.951	0.93	0.808	0.912	0.867
0.94	0.95	0.934	0.891	0.932	0.907	0.839	0.91	0.862	0.926
0.965	0.96	0.914	0.929	0.89	0.903	0.976	0.849	0.928	0.963
0.942	0.951	0.958	0.97	0.964	0.935	0.978	0.933	0.93	0.826
0.955	0.937	0.952	0.949	0.857	0.946	0.734	0.936	0.923	0.965
0.967	0.966	0.95	0.97	0.847	0.887	0.972	0.953	0.946	0.962
0.946	0.959	0.953	0.964	0.874	0.93	0.969	0.854	0.832	0.805
0.958	0.964	0.971	0.96	0.832	0.943	0.746	0.955	0.829	0.942
0.955	0.959	0.951	0.975	0.925	0.942	0.975	0.942	0.829	0.961
0.945	0.97	0.969	0.969	0.856	0.84	0.93	0.956	0.765	0.892
0.956	0.949	0.919	0.933	0.856	0.896	0.889	0.741	0.947	0.951
0.97	0.958	0.944	0.966	0.884	0.971	0.979	0.799	0.976	0.894
0.959	0.957	0.968	0.971	0.949	0.918	0.96	0.942	0.886	0.95
0.959	0.953	0.944	0.969	0.84	0.843	0.978	0.857	0.966	0.913
0.937	0.968	0.93	0.969	0.948	0.946	0.964	0.926	0.884	0.944
0.945	0.965	0.955	0.96	0.795	0.804	0.97	0.947	0.898	0.961
0.917	0.95	0.975	0.974	0.899	0.957	0.898	0.9	0.854	0.964
0.955	0.969	0.946	0.963	0.946	0.922	0.97	0.957	0.914	0.963
0.963	0.954	0.933	0.976	0.73	0.965	0.911	0.7	0.887	0.863
0.909	0.939	0.96	0.972	0.865	0.955	0.933	0.927	0.834	0.909
0.958	0.955	0.961	0.976	0.906	0.892	0.834	0.945	0.955	0.838
0.947	0.963	0.953	0.947	0.921	0.894	0.807	0.961	0.959	0.931
0.947	0.969	0.927	0.945	0.901	0.843	0.857	0.883	0.949	0.841
0.941	0.971	0.967	0.954	0.941	0.889	0.88	0.949		0.86
0.94	0.974	0.945	0.954	0.854	0.901	0.898	0.964		0.944
0.963	0.962	0.962	0.95	0.85	0.928	0.898	0.929		0.959
0.951	0.963	0.931	0.963	0.906	0.915	0.962	0.926		0.931
0.926	0.961	0.947	0.953	0.907	0.836	0.885	0.963		0.908
0.932	0.967	0.947	0.957	0.815	0.961	0.844	0.963		0.892
0.955	0.919	0.953	0.923	0.86	0.919	0.916	0.953		0.74
0.961	0.97	0.963	0.956	0.869	0.924	0.956	0.881		0.894
0.952	0.969	0.933	0.969	0.914	0.967	0.95	0.898		0.963
0.948	0.952	0.97	0.968	0.865	0.964	0.968	0.97		0.879
0.957	0.933	0.964	0.968	0.847	0.925	0.94	0.917		0.967
0.924	0.953	0.959	0.95	0.952	0.967	0.965	0.943
0.945	0.966	0.958	0.964	0.944	0.962	0.827	0.936
0.971	0.962	0.95	0.95	0.87	0.89	0.963	0.969
0.933	0.96	0.938	0.958	0.84	0.953	0.927	0.907
0.937	0.956	0.958	0.923	0.737	0.943	0.969	0.956
0.962	0.962	0.939	0.961	0.893	0.905	0.969	0.964
0.951	0.948	0.95	0.962	0.896	0.938	0.978	0.967
0.906	0.961	0.969	0.95	0.947	0.929	0.961	0.959
0.925	0.937	0.949	0.964	0.894	0.844	0.963	0.97
0.944	0.949	0.957	0.976	0.959	0.967	0.929	0.934
0.97	0.958	0.89	0.968	0.78	0.852	0.97	0.961
0.968	0.941	0.958		0.92	0.92	0.921	0.801
0.961	0.972	0.948		0.891	0.924	0.933	0.858
0.972	0.981	0.949		0.942	0.907	0.904	0.96
0.974	0.963	0.932		0.895	0.927	0.77	0.895
0.963	0.966	0.94		0.857	0.951	0.964	0.944
0.961	0.967	0.936		0.793	0.933	0.852	0.908
0.966	0.933	0.947		0.957	0.931	0.918	0.964
0.959	0.961	0.948		0.863	0.912	0.961
0.96	0.951	0.958		0.859		0.936
0.952	0.968	0.943		0.948		0.964
0.967	0.971	0.96		0.967		0.965
0.966	0.967	0.911		0.945		0.964
0.97	0.966	0.915		0.961
0.977	0.938	0.952		0.948
0.914		0.96		0.957
0.96		0.958		0.819
0.951		0.946		0.881
0.966		0.958		0.959
0.97		0.915		0.949
0.954		0.938		0.948
0.963		0.957		0.804
0.959		0.93		0.722
0.953		0.941		0.924
0.945		0.953		0.836
0.952		0.961		0.966
0.957		0.954		0.895
0.95		0.953		0.931
0.967		0.968		0.795
0.971		0.951		0.831
0.965		0.967		0.956
0.95		0.935		0.898
0.929		0.96		0.952
0.947		0.959		0.953
0.948		0.943		0.73
0.955		0.958		0.887
0.956		0.96		0.815
0.945		0.969		0.927
0.952		0.956		0.864
0.961		0.958		0.899
0.953		0.962		0.905
0.966		0.954		0.914
0.958		0.965		0.908
0.96		0.972		0.665
0.948		0.88		0.916
0.958		0.854		0.932
0.955		0.931		0.944
0.941		0.963		0.907
0.97		0.972		0.909
0.952		0.945		0.877
0.955		0.963		0.831
0.929		0.958		0.69
0.95		0.94		0.874
0.938		0.973		0.882
0.947		0.957		0.923
0.94		0.954		0.739
0.955		0.937		0.863
0.967		0.961		0.915
0.969		0.906		0.967
0.964		0.947		0.89
0.965		0.944		0.965
0.969		0.925		0.945
0.964		0.957		0.929
0.965		0.969		0.955
0.972		0.938		0.831
0.972		0.965		0.922
0.944		0.949		0.954
0.927		0.969		0.913
0.963		0.943		0.91
0.958				0.881
0.959				0.924
0.965
0.957
0.96
0.971
0.957
0.946
0.967
0.974
0.978
0.967
0.923
0.967
0.967
0.965
0.954
0.97
0.957
0.975
0.956
0.919
0.957
0.964
0.954
0.937
0.97
0.964
0.973
0.968
0.96
0.967
0.96
0.976	0.954	0.961	0.978	0.918	0.769	0.965	0.835	0.958	0.95
0.973	0.963	0.963	0.976	0.969	0.936	0.848	0.83	0.97	0.817
0.965	0.956	0.855	0.958	0.808	0.977	0.963	0.863	0.945	0.923
0.964	0.96	0.966	0.972	0.79	0.954	0.855	0.97	0.942	0.956
0.97	0.967	0.956	0.975	0.976	0.772	0.974	0.783	0.925	0.909
0.976	0.959	0.928	0.972	0.905	0.929	0.974	0.92	0.97	0.973
0.978	0.972	0.969	0.933	0.973	0.974	0.981	0.867	0.941	0.96
0.967	0.955	0.942	0.958	0.963	0.969	0.929	0.95	0.858	0.861
0.965	0.968	0.956	0.964	0.831	0.965	0.853	0.788	0.959	0.944
0.969	0.972	0.972	0.973	0.939	0.892	0.962	0.82	0.944	0.89
0.968	0.963	0.96	0.923	0.863	0.947	0.779	0.919	0.965	0.946
0.98	0.95	0.967	0.965	0.83	0.905	0.91	0.967	0.961	0.899
0.97	0.969	0.969	0.957	0.85	0.921	0.963	0.816	0.952	0.918
0.944	0.967	0.943	0.972	0.942	0.977	0.98	0.874	0.949	0.935
0.962	0.973	0.964	0.961	0.764	0.969	0.923	0.845	0.967	0.918
0.962	0.965	0.966	0.937	0.943	0.877	0.777	0.805	0.934	0.97
0.967	0.955	0.966	0.947	0.922	0.944	0.855	0.899	0.959	0.933
0.974	0.959	0.926	0.974	0.968	0.952	0.858	0.9	0.968	0.96
0.978	0.965	0.925	0.959	0.945	0.876	0.825	0.974	0.967	0.957
0.971	0.937	0.959	0.944	0.86	0.904	0.907	0.914	0.958	0.967
0.97	0.949	0.976	0.977	0.762	0.871	0.936	0.967	0.948	0.945
0.972	0.925	0.958	0.967	0.944	0.946	0.794	0.978	0.952	0.943
0.968	0.945	0.952	0.934	0.966	0.88	0.907	0.974	0.976	0.945
0.971	0.952	0.964	0.971	0.901	0.932	0.97	0.98	0.964	0.933
0.967	0.948	0.974	0.969	0.954	0.916	0.802	0.971	0.834	0.921
0.974	0.953	0.965	0.956	0.975	0.952	0.955	0.96	0.952	0.788
0.983	0.958	0.964	0.969	0.96	0.971	0.898	0.954	0.841	0.933
0.979	0.967	0.961	0.919	0.865	0.921	0.783	0.908	0.934	0.944
0.974	0.968	0.977	0.972	0.98	0.92	0.869	0.959	0.962	0.949
0.965	0.957	0.969	0.963	0.951	0.937	0.833	0.957	0.834	0.95
0.971	0.959	0.974	0.973	0.921	0.84	0.94	0.952	0.951	0.956
0.966	0.959	0.929	0.972	0.954	0.889	0.924	0.979	0.969	0.952
0.981	0.973	0.948	0.966	0.788	0.924	0.898	0.863	0.961	0.95
0.972	0.964	0.951	0.973	0.933	0.886	0.947	0.947	0.94	0.967
0.953	0.967	0.97	0.965	0.917	0.916	0.892	0.924	0.97	0.763
0.977	0.956	0.943	0.975	0.918	0.942	0.956	0.948	0.829	0.878
0.962	0.975	0.951	0.961	0.939	0.875	0.9	0.843	0.957	0.97
0.961	0.962	0.914	0.971	0.92	0.947	0.88	0.97	0.94	0.788
0.972	0.943	0.938	0.974	0.943	0.976	0.807	0.968	0.969	0.935
0.968	0.975	0.969	0.936	0.941	0.962	0.92	0.901	0.954	0.883
0.969	0.962	0.943	0.973	0.976	0.839	0.968	0.875	0.752	0.821
0.962	0.941	0.975	0.939	0.865	0.927	0.901	0.917	0.972	0.96
0.953	0.962	0.895	0.956	0.787	0.898	0.74	0.951	0.972	0.918
0.943	0.969	0.972	0.972	0.907	0.918	0.767	0.936	0.959	0.853
0.947	0.946	0.958	0.978	0.968	0.908	0.873	0.95	0.954	0.891
0.963	0.969	0.975	0.978	0.965	0.918	0.938	0.896	0.953	0.97
0.965	0.967	0.949	0.969	0.941	0.96	0.852	0.93	0.89	0.955
0.965	0.975	0.949	0.98	0.932	0.971	0.974	0.862	0.971	0.959
0.95	0.975	0.962	0.974	0.974	0.976	0.941	0.97	0.812	0.906
0.973	0.972	0.947	0.976	0.868	0.921	0.926	0.88	0.848	0.95
0.971	0.954	0.938	0.97	0.863	0.95	0.834	0.843	0.838	0.939
0.97	0.971	0.971	0.98	0.942	0.913	0.821	0.942	0.958	0.84
0.961	0.931	0.946	0.979	0.85	0.931	0.874	0.967	0.899	0.963
0.967	0.975	0.954	0.978	0.945	0.939	0.887	0.934	0.915	0.924
0.967	0.967	0.966	0.97	0.968	0.885	0.867	0.921	0.962	0.938
0.969	0.973	0.962	0.966	0.953	0.902	0.798	0.844	0.956	0.948
0.935	0.97	0.967	0.978	0.966	0.904	0.974	0.891	0.867	0.945
0.971	0.956	0.964	0.957	0.817	0.955	0.964	0.979	0.943	0.943
0.972	0.956	0.971	0.96	0.921	0.967	0.898	0.868	0.952	0.933
0.968	0.971	0.945	0.962	0.974	0.918	0.906	0.948	0.96	0.926
0.972	0.965	0.973	0.964	0.974	0.974	0.869	0.908	0.947	0.871
0.961	0.948	0.959	0.978	0.928	0.87	0.913	0.957	0.973	0.944
0.961	0.934	0.952	0.975	0.94	0.972	0.908	0.93	0.969	0.965
0.978	0.968	0.971	0.981	0.962	0.791	0.946	0.848	0.932	0.97
0.956	0.956	0.955	0.974	0.854	0.948	0.958	0.899	0.931	0.971
0.971	0.969	0.97	0.957	0.961	0.921	0.963	0.946	0.959	0.928
0.971	0.972	0.939	0.971	0.967	0.944	0.957	0.839	0.912	0.812
0.968	0.962	0.968	0.976	0.95	0.963	0.962	0.934	0.946	0.964
0.969	0.946	0.958	0.949	0.961	0.883	0.973	0.944	0.953	0.962
0.966	0.959	0.974	0.918	0.963	0.888	0.918	0.969	0.975	0.967
0.976	0.964	0.971	0.931	0.935	0.978	0.89	0.921	0.918	0.954
0.974	0.98	0.97	0.964	0.875	0.901	0.932	0.878	0.828	0.962
0.969	0.972	0.971	0.968	0.838	0.855	0.937	0.919	0.919	0.828
0.975	0.972	0.963	0.974	0.879	0.904	0.924	0.846	0.884	0.906
0.974	0.969	0.966	0.928	0.864	0.866	0.847	0.961	0.954	0.966
0.967	0.952	0.934	0.977	0.974	0.894	0.963	0.898	0.872	0.692
0.968	0.957	0.942	0.947	0.923	0.942	0.965	0.883	0.942	0.958
0.977	0.976	0.971	0.965	0.947	0.866	0.922	0.972	0.967	0.943
0.963	0.968	0.972	0.97	0.806	0.973	0.979	0.912	0.902	0.928
0.971	0.968	0.961	0.968	0.947	0.937	0.921	0.867	0.954	0.961
0.972	0.953	0.957	0.95	0.808	0.94	0.831	0.947	0.95	0.96
0.969	0.974	0.974	0.97	0.971	0.967	0.973	0.881	0.835	0.962
0.962	0.966	0.965	0.973	0.969	0.914	0.978	0.854	0.855	0.831
0.893	0.961	0.974	0.96	0.821	0.877	0.965	0.849	0.794	0.965
0.96	0.975	0.961	0.972	0.955	0.928	0.948	0.964	0.95	0.968
0.977	0.957	0.919	0.864	0.948	0.967	0.967	0.951	0.932	0.838
0.938	0.97	0.973	0.961	0.954	0.931	0.911	0.965	0.923	0.804
0.963	0.973	0.97	0.939	0.961	0.956	0.929	0.976	0.86	0.908
0.963	0.975	0.914	0.96	0.962	0.849	0.912	0.976	0.934	0.943
0.974	0.972	0.971	0.92	0.964	0.955	0.969	0.681	0.971	0.927
0.976	0.958	0.959	0.952	0.97	0.899	0.866	0.954	0.973	0.939
0.962	0.928	0.961	0.96	0.862	0.975	0.969	0.97	0.962	0.965
0.979	0.941	0.952	0.976	0.875	0.966	0.956	0.954	0.842	0.951
0.969	0.956	0.935	0.968	0.91	0.825	0.924	0.918	0.963	0.931
0.97	0.977	0.971	0.964	0.816	0.967	0.96	0.968	0.943	0.945
0.97	0.956	0.965	0.952	0.843	0.937	0.926	0.927	0.793	0.947
0.974	0.972	0.934	0.956	0.825	0.84	0.91	0.834	0.95	0.893
0.97		0.915	0.954	0.941	0.913	0.814	0.966	0.962	0.886
0.949		0.968	0.966	0.978	0.915	0.968	0.943	0.973	0.952
0.944		0.958	0.926	0.835	0.818	0.876	0.938	0.976	0.86
0.968		0.978	0.942	0.849	0.912	0.769	0.947	0.955	0.945
0.968		0.956	0.969	0.966	0.86	0.823	0.889	0.945	0.932
0.968		0.948	0.952	0.782	0.765	0.975	0.966	0.968	0.963
0.967		0.927	0.965	0.977	0.872	0.916	0.971	0.813	0.969
0.973		0.963	0.966	0.873	0.848	0.953	0.854	0.912	0.958
0.977		0.926	0.969	0.981	0.877	0.979	0.969	0.963	0.912
0.964		0.955	0.972	0.976	0.948	0.841	0.968	0.808	0.952
0.971		0.972	0.957	0.958	0.924	0.843	0.956	0.923	0.973
0.952		0.916	0.962	0.961	0.863	0.885	0.958	0.972	0.956
0.969		0.954	0.965	0.86	0.856	0.942	0.889	0.837	0.954
0.964		0.972	0.976	0.891	0.909	0.879	0.966	0.953	0.959
0.973		0.969	0.964	0.897	0.875	0.938	0.972	0.95	0.943
0.974		0.972	0.973	0.959	0.904	0.969	0.947		0.889
0.975		0.957	0.974	0.947	0.973	0.962	0.973		0.932
0.972		0.972	0.959	0.945	0.927	0.796	0.846		0.766
0.958		0.965	0.97	0.973	0.813	0.965	0.89		0.946
0.976		0.965	0.967	0.977	0.92	0.943	0.929		0.929
0.977		0.954	0.977	0.977	0.902	0.967	0.96		0.916
0.97		0.968	0.964	0.957	0.925	0.915	0.901		0.956
0.977		0.955	0.96	0.977	0.946	0.913	0.87		0.931
0.966		0.97	0.958	0.958	0.846	0.978	0.86		0.953
0.956		0.975	0.943	0.96	0.963	0.895	0.882		0.958
0.975		0.959	0.947	0.894	0.857	0.915	0.915		0.971
0.965		0.944	0.967	0.977	0.967	0.915	0.965		0.94
0.972		0.949	0.971	0.974	0.97	0.791	0.899		0.961
0.975		0.976	0.912	0.969	0.951	0.906	0.868		0.937
0.965		0.971	0.969	0.836	0.914	0.903	0.96		0.863
0.972		0.969	0.906		0.872	0.846	0.961		0.905
0.98		0.963	0.949		0.836	0.848	0.955		0.95
0.974		0.964	0.975		0.969	0.968	0.937		0.92
0.977		0.974	0.967		0.967	0.806	0.945		0.901
0.967		0.965	0.977		0.936	0.888	0.944		0.943
0.969		0.975	0.948		0.85	0.953			0.958
0.963		0.922	0.973		0.78	0.93			0.961
0.972		0.969	0.976		0.966	0.977			0.943
0.972		0.926	0.969		0.97	0.974			0.944
0.978		0.972	0.973		0.933	0.796			0.956
0.967		0.977	0.977		0.973	0.951			0.953
0.979		0.972	0.961		0.971	0.884			0.958
0.974		0.972	0.957		0.927	0.908			0.929
0.981		0.967	0.967		0.964	0.981			0.945
0.982		0.968	0.955		0.974	0.976			0.956
0.976		0.976	0.964		0.891	0.913			0.958
0.963		0.969	0.962		0.964				0.945
0.963		0.969	0.969		0.849				0.954
0.977		0.942	0.971		0.9				0.939
0.969		0.957	0.939		0.974				0.957
0.954		0.941	0.944		0.894				0.959
0.979		0.977	0.967		0.965				0.959
0.965		0.951	0.978		0.938				0.965
0.966		0.979	0.955		0.949				0.965
0.976		0.956	0.94		0.865				0.968
0.978		0.963	0.976		0.928				0.97
0.972		0.951	0.911		0.917				0.963
0.957		0.953	0.951		0.89				0.971
		0.952	0.957		0.959				0.919
		0.957	0.962		0.95				0.888
		0.963	0.969		0.904				0.959
		0.963	0.913		0.96				0.901
		0.92	0.974		0.964				0.877
		0.963	0.944		0.822
		0.949	0.975		0.937
		0.968	0.967		0.922
		0.92	0.973		0.805
		0.964	0.942		0.865
		0.974	0.976		0.938
		0.969	0.963		0.805
			0.973		0.774
			0.968		0.873
			0.966		0.941
			0.953
			0.966
			0.964
			0.96
			0.964
			0.97
0.9	0.969	0.924	0.975	0.951	0.936	0.785	0.915	0.783	0.967
0.972	0.958	0.956	0.958	0.97	0.953	0.967	0.923	0.949	0.877
0.949	0.967	0.963	0.922	0.87	0.938	0.935	0.921	0.922	0.899
0.955	0.969	0.96	0.943	0.947	0.952	0.927	0.957	0.938	0.96
0.961	0.973	0.939	0.965	0.798	0.947	0.928	0.967	0.937	0.944
0.952	0.96	0.974	0.951	0.978	0.975	0.815	0.94	0.925	0.952
0.965	0.954	0.975	0.968	0.854	0.918	0.977	0.967	0.944	0.968
0.966	0.965	0.959	0.973	0.902	0.877	0.969	0.9	0.961	0.921
0.938	0.969	0.915	0.967	0.953	0.963	0.956	0.943	0.906	0.977
0.969	0.965	0.943	0.962	0.926	0.947	0.851	0.958	0.962	0.964
0.96	0.973	0.979	0.968	0.906	0.942	0.916	0.94	0.959	0.983
0.965	0.971	0.966	0.937	0.811	0.881	0.965	0.962	0.966	0.954
0.965	0.945	0.967	0.951	0.788	0.898	0.962	0.92	0.97	0.96
0.965	0.947	0.966	0.952	0.961	0.968	0.835	0.962	0.884	0.942
0.971	0.946	0.949	0.916	0.814	0.862	0.9	0.963	0.888	0.931
0.955	0.954	0.953	0.923	0.746	0.967	0.971	0.96	0.788	0.933
0.964	0.955	0.965	0.952	0.965	0.953	0.957	0.889	0.733	0.915
0.972	0.936	0.96	0.925	0.975	0.961	0.952	0.898	0.939	0.918
0.959	0.965	0.954	0.943	0.974	0.928	0.967	0.879	0.838	0.962
0.969	0.97	0.961	0.967	0.91	0.967	0.963	0.973	0.959	0.847
0.957	0.961	0.95	0.966	0.859	0.925	0.941	0.826	0.905	0.897
0.972	0.962	0.912	0.946	0.898	0.852	0.977	0.974	0.947	0.832
0.956	0.971	0.962	0.961	0.968	0.975	0.893	0.821	0.962	0.878
0.972	0.972	0.963	0.966	0.963	0.894	0.888	0.942	0.918	0.919
0.973	0.956	0.972	0.966	0.932	0.935	0.927	0.86	0.892	0.962
0.968	0.942	0.956	0.975	0.86	0.919	0.95	0.886	0.96	0.809
0.956	0.95	0.957	0.971	0.959	0.977	0.962	0.901	0.971	0.91
0.968	0.972	0.975	0.966	0.838	0.787	0.938	0.914	0.974	0.856
0.953	0.961	0.953	0.943	0.973	0.951	0.978	0.924	0.969	0.975
0.972	0.945	0.962	0.971	0.815	0.954	0.927	0.788	0.968	0.832
0.954	0.97	0.939	0.952	0.869	0.868	0.919	0.801	0.968	0.879
0.957	0.957	0.959	0.973	0.902	0.899	0.937	0.871	0.971	0.962
0.96	0.964	0.965	0.971	0.961	0.851	0.94	0.932	0.97	0.774
0.959	0.965	0.975	0.946	0.942	0.953	0.94	0.766	0.945	0.944
0.961	0.971	0.95	0.967	0.934	0.961	0.832	0.868	0.972	0.918
0.977	0.968	0.964	0.975	0.81	0.967	0.819	0.923	0.839	0.919
0.968	0.976	0.946	0.961	0.827	0.953	0.898	0.913	0.791	0.921
0.957	0.975	0.951	0.955	0.854	0.966	0.918	0.948	0.957	0.942
0.959	0.976	0.975	0.936	0.932	0.971	0.832	0.873	0.981	0.977
0.976	0.974	0.979	0.954	0.885	0.853	0.968	0.906	0.944	0.896
0.97	0.968	0.962	0.962	0.906	0.87	0.92	0.874	0.963	0.933
0.956	0.971	0.971	0.971	0.934	0.974	0.958	0.927	0.93	0.927
0.941	0.966	0.973	0.958	0.888	0.899	0.943	0.96	0.946	0.869
0.972	0.958	0.978	0.969	0.841	0.853	0.859	0.926	0.968	0.875
0.962	0.961	0.966	0.951	0.796	0.948	0.908	0.934	0.959	0.932
0.952	0.965	0.949	0.954	0.91	0.883	0.807	0.965	0.967	0.968
0.957	0.97	0.961	0.968	0.924	0.902	0.879	0.928	0.95	0.95
0.966	0.946	0.945	0.97	0.899	0.963	0.972	0.908	0.954	0.911
0.977	0.964	0.952	0.95	0.843	0.846	0.972	0.863	0.948	0.971
0.959	0.973	0.97	0.952	0.87	0.917	0.962	0.949	0.95	0.938
0.951	0.979	0.864	0.97	0.874	0.888	0.977	0.94	0.964	0.83
0.974	0.97	0.958	0.967	0.903	0.915	0.946	0.855	0.968	0.861
0.964	0.97	0.932	0.97	0.831	0.786	0.961	0.882	0.9	0.859
0.966	0.969	0.95	0.948	0.813	0.977	0.976	0.851	0.921	0.97
0.969	0.961	0.959	0.977	0.959	0.94	0.963	0.965	0.93	0.883
0.972	0.959	0.969	0.952	0.817	0.918	0.875	0.944	0.809	0.913
0.961	0.965	0.964	0.969	0.825	0.801	0.925	0.856	0.845	0.957
0.948	0.958	0.961	0.979	0.876	0.892	0.957	0.982	0.947	0.948
0.97	0.966	0.951	0.976	0.859	0.974	0.959	0.959	0.892	0.959
0.978	0.973	0.959	0.941	0.734	0.865	0.755	0.926	0.852	0.928
0.883	0.967	0.975	0.973	0.861	0.884	0.947	0.864	0.964	0.966
0.953	0.974	0.962	0.944	0.827	0.869	0.808	0.964	0.934	0.865
0.974	0.98	0.965	0.967	0.931	0.783	0.96	0.934	0.948	0.849
0.949	0.976	0.951	0.955	0.946	0.865	0.789	0.936	0.951	0.883
0.854	0.971	0.968	0.962	0.894	0.973	0.883	0.862	0.866	0.895
0.96	0.971	0.965	0.959	0.97	0.968	0.814	0.879	0.87	0.875
0.943	0.966	0.966	0.949	0.817	0.972	0.966	0.904	0.96	0.927
0.938	0.957	0.963	0.962	0.951	0.917	0.868	0.957	0.862	0.861
0.972	0.976	0.965	0.956	0.904	0.894	0.907	0.975	0.888	0.916
0.967	0.946	0.965	0.949	0.887	0.946	0.746	0.922	0.946	0.952
0.965	0.978	0.963	0.951	0.879	0.872	0.807	0.954	0.967	0.848
0.966	0.963	0.968	0.947	0.898	0.871	0.94	0.842	0.779	0.927
0.962	0.967	0.921	0.966	0.902	0.954	0.972	0.902	0.975	0.966
0.962	0.963	0.935	0.968	0.924	0.906	0.966	0.973	0.961	0.88
0.976	0.977	0.976	0.947	0.941	0.889	0.973	0.83	0.829	0.839
0.972	0.945	0.955	0.968	0.961	0.964	0.802	0.875	0.836	0.869
0.961	0.954	0.963	0.961	0.83	0.971	0.839	0.936	0.936	0.933
0.951	0.923	0.975	0.95	0.978	0.966	0.961	0.868	0.65	0.827
0.948	0.941	0.975	0.963	0.973	0.91	0.962	0.945	0.793	0.9
0.964	0.96	0.972	0.969	0.903	0.861	0.943	0.947	0.882	0.838
0.967	0.966	0.978	0.946	0.967	0.83	0.784	0.934	0.91	0.941
0.967	0.965	0.934	0.917	0.917	0.888	0.976	0.915	0.874	0.891
0.956	0.98	0.976	0.889	0.864	0.967	0.925	0.957	0.966	0.901
0.966	0.968	0.928	0.937	0.881	0.908	0.879	0.969	0.942	0.854
0.942	0.954	0.934	0.959	0.862	0.892	0.92	0.844	0.902	0.947
0.967	0.977	0.968	0.968	0.979	0.866	0.824	0.896	0.941	0.945
0.969	0.975	0.962	0.972	0.786	0.976	0.812	0.954	0.94	0.876
0.968	0.971	0.968	0.939	0.881	0.914	0.973	0.973	0.796	0.921
0.95	0.976	0.975	0.907	0.878	0.973	0.958	0.974	0.967	0.944
0.967	0.917	0.964	0.924	0.903	0.968	0.853	0.868	0.882	0.931
0.966	0.966	0.963	0.922	0.906	0.965		0.902	0.873
0.939	0.975	0.976	0.968	0.961	0.907		0.925	0.964
0.973	0.961	0.843	0.973	0.948	0.965		0.963	0.977
0.966	0.969	0.94	0.96	0.921	0.969		0.896	0.913
0.96	0.949	0.97	0.958	0.947	0.973		0.831	0.838
0.976	0.965	0.976	0.939	0.886	0.947		0.868	0.807
0.958	0.966	0.97	0.971	0.9	0.908		0.977	0.873
0.962	0.976	0.965	0.957	0.863	0.853		0.927	0.962
0.965	0.957	0.959	0.965	0.901	0.864		0.956	0.936
0.976	0.974	0.948	0.973	0.961	0.917		0.936	0.959
0.963	0.964	0.806	0.964	0.953	0.927		0.963	0.919
0.97	0.969	0.974	0.965	0.798	0.964		0.96	0.74
0.978	0.978	0.939	0.971	0.933	0.972		0.94	0.95
0.972	0.972	0.972	0.973	0.903	0.888		0.947	0.972
0.98		0.965	0.973	0.926	0.95		0.83	0.873
0.949		0.978	0.965	0.88	0.871		0.837	0.947
0.972		0.976	0.965	0.97	0.968		0.959	0.903
0.973		0.977	0.971	0.947	0.952		0.855	0.908
0.97		0.978	0.962	0.967	0.83		0.967	0.975
0.976		0.924	0.967	0.922	0.889		0.955
0.979		0.976	0.972	0.937	0.967		0.933
0.96		0.971	0.973	0.866	0.875		0.962
0.973		0.969	0.93	0.976	0.732		0.876
0.962		0.945	0.958	0.73	0.873		0.98
0.978		0.974	0.949	0.976	0.931		0.977
0.976		0.977	0.962	0.945	0.919		0.951
0.975		0.98	0.973	0.966	0.948		0.96
0.977		0.936	0.969	0.962	0.968		0.907
0.979		0.905	0.963	0.963	0.952		0.828
0.947		0.956	0.969	0.853	0.871		0.975
0.976		0.954	0.93	0.964	0.949		0.941
0.971		0.929	0.922	0.977	0.951		0.934
0.973		0.974	0.954	0.981	0.956		0.958
0.974		0.971	0.966	0.939	0.952		0.843
0.969		0.866	0.96	0.892	0.868		0.961
0.941		0.965	0.973	0.953	0.894		0.91
0.968		0.975	0.969	0.919	0.865		0.855
0.973		0.885	0.978	0.901			0.954
0.977		0.889	0.977	0.947			0.935
0.964		0.969	0.936	0.836			0.938
0.951		0.911	0.971	0.967			0.898
0.952		0.964	0.977	0.857			0.941
0.962		0.944	0.948	0.732			0.924
0.965		0.97	0.964	0.977			0.915
0.959		0.961	0.946	0.679			0.861
0.97			0.954	0.952
0.961			0.938	0.898
0.97			0.949	0.935
0.96			0.949
0.965			0.941
0.962			0.968
0.973			0.975
0.966			0.974
0.972			0.974
0.968			0.951
0.933			0.97
0.933			0.947
0.972			0.954
0.936			0.963
0.96			0.956
0.975			0.964
0.855			0.963
0.973			0.958
0.901			0.955
0.969			0.96
0.954
0.972
0.966
0.965
0.954
0.939
0.961
0.963
0.967
0.957
0.963
0.967
