# Supplementary material for: Pathogenic mutations in the chromokinesin KIF22 disrupt anaphase chromosome segregation
Source: eLife journal article supplement (doi:10.7554/elife.78653), 2022-06-22
Supplement: supp [file F7 Division of Abnormal Nuclei.xlsx]

## Sheet: Sheet1
Number of Cells
	Division	No Division
GFP	254	2207
KIF22-GFP	257	2354
KIF22-GFP R149Q	251	1639
KIF22-GFP V475G	206	2140
% Cells
	Normal Divides	Abnormal Divides	Normal No Div	Abnormal No Div
GFP	10.1585	0.162536	86.3876	3.29134
KIF22-GFP	9.42168	0.421295	85.3696	4.78744
KIF22-GFP R149Q	4.60317	8.67725	16.0317	70.6878
KIF22-GFP V475G	3.45269	5.32822	20.3325	70.8866
