# Supplementary material for: Pathogenic mutations in the chromokinesin KIF22 disrupt anaphase chromosome segregation
Source: eLife journal article supplement (doi:10.7554/elife.78653), 2022-06-22
Supplement: supp [file F7 Proliferation.xlsx]

## Sheet: Sheet1
Hours	KIF22 Knockdown																GFP																KIF22-GFP																KIF22-GFP R149Q
0	1	1	1	1	1	1	1	1									1	1	1	1	1	1	1	1	1	1	1						1	1	1	1	1	1	1	1	1								1
4	1.14165	1.15851	1.15816	1.15049	1.1282	1.12654	1.10537	1.10179									1.1613	1.16327	1.17472	1.19275	1.22799	1.23007	1.22026	1.13495	1.15779	1.15989	1.14478						1.15336	1.14421	1.1767	1.16493	1.2307	1.14106	1.1516	1.15996	1.17308								1.15754
8	1.39006	1.41732	1.40625	1.40107	1.32418	1.30701	1.28225	1.28984									1.40406	1.43165	1.43881	1.44642	1.42888	1.41591	1.41568	1.34856	1.37882	1.36345	1.36559						1.41052	1.42957	1.4604	1.45363	1.41755	1.3591	1.36894	1.37233	1.38595								1.40922
12	1.62447	1.67599	1.65781	1.65765	1.48229	1.44766	1.43045	1.4574									1.68982	1.6975	1.73584	1.74102	1.65585	1.62054	1.62409	1.55363	1.56987	1.5348	1.56072						1.69672	1.72452	1.77171	1.7243	1.63387	1.54822	1.56028	1.57674	1.57868								1.68876
16	1.8933	1.93774	1.92112	1.91531	1.68401	1.66032	1.62938	1.65771									1.97727	1.98704	2.04057	2.07623	1.89576	1.86757	1.87196	1.78102	1.80811	1.75793	1.77786						1.98727	2.00124	2.0845	2.03204	1.89369	1.77856	1.78849	1.80578	1.81934								1.98904
20	2.21376	2.27566	2.24998	2.26147	1.86648	1.8713	1.80896	1.83205									2.30639	2.38025	2.41819	2.4933	2.22417	2.15245	2.15149	1.99651	2.06124	1.98819	1.99245						2.31787	2.35921	2.50545	2.42891	2.16495	2.01389	2.03635	2.05571	2.06593								2.30318
24	2.54594	2.67327	2.63785	2.66083	2.11448	2.06337	2.00711	2.02002									2.68856	2.81852	2.86886	2.95241	2.49044	2.39975	2.39852	2.27623	2.30489	2.24032	2.25049						2.71502	2.82345	3.0056	2.88419	2.39499	2.25011	2.30792	2.31479	2.31346								2.66043
28	2.93135	3.07388	3.02595	3.07287	2.32397	2.26895	2.21565	2.22939									3.17898	3.26816	3.35753	3.43333	2.76324	2.61764	2.63849	2.51591	2.54538	2.4557	2.46862						3.17566	3.2738	3.47557	3.35246	2.60613	2.46163	2.53664	2.54003	2.54039								2.97175
32	3.33041	3.49555	3.46565	3.48126	2.55566	2.53297	2.44909	2.47271									3.64562	3.73746	3.88314	3.93313	3.01484	2.86124	2.87856	2.77313	2.78748	2.69686	2.67412						3.57446	3.67132	3.94203	3.79082	2.81269	2.63629	2.73751	2.74789	2.73897								3.20614
36	3.73632	3.9546	3.9051	3.94245	2.805	2.80104	2.65543	2.68923									4.13976	4.31114	4.441	4.51844	3.29203	3.11278	3.11832	2.98719	2.98137	2.90664	2.87447						3.96826	4.13781	4.43168	4.28358	2.99903	2.78784	2.91157	2.94358	2.90272								3.4039
40	4.14681	4.42196	4.40743	4.46562	3.04726	3.05419	2.90779	2.93232									4.68617	4.93687	5.07743	5.18387	3.55375	3.35096	3.35891	3.20371	3.21742	3.12683	3.09415						4.45192	4.66013	4.96794	4.80121	3.15473	2.95686	3.1052	3.14589	3.10794								3.62224
44	4.53502	4.87873	4.8887	4.98491	3.28784	3.32841	3.17467	3.22345									5.24732	5.5235	5.69905	5.81907	3.75947	3.57958	3.5719	3.42593	3.47106	3.3659	3.33258						4.81454	5.05953	5.42063	5.24288	3.27379	3.11622	3.29728	3.32836	3.25069								3.80193
48	4.90687	5.28788	5.34803	5.42783	3.62512	3.68219	3.48168	3.5512									5.74932	6.06119	6.2693	6.45499	3.94378	3.79274	3.7656	3.69129	3.75596	3.6153	3.45331						5.11654	5.34656	5.75871	5.61754	3.36038	3.27763	3.49668	3.49135	3.34583								3.96173
52	5.26501	5.69424	5.80792	5.88241	3.87453	4.01654	3.73148	3.83114									6.23784	6.64689	6.8777	7.07988	4.12577	3.97853	3.95145	3.89947	3.93219	3.8631	3.71072						5.38536	5.64515	6.1448	5.95119	3.45866	3.33824	3.6479	3.71244	3.55657								4.06605
56	5.53185	5.95364	6.15303	6.20081	4.09396	4.17237	3.9228	4.04035									6.59251	7.09085	7.3783	7.63568	4.27426	4.15519	4.12414	4.08397	4.07735	4.05157	3.87511						5.45306	5.80862	6.30229	6.12093	3.53946	3.46886	3.69142	3.78243	3.6274								4.11895
60	5.76722	6.24277	6.46715	6.56634	4.26292	4.36991	4.07898	4.24644									6.89448	7.39126	7.8564	8.15832	4.31733	4.3195	4.22099	4.25411	4.24314	4.19623	4.00127						5.5656	5.92288	6.41348	6.29373	3.55745	3.52314	3.78465	3.85903	3.69893								4.18094
64	5.94086	6.52079	6.77747	6.70516	4.26033	4.46825	4.27485	4.38401									6.83161	7.34231	7.92174	8.3855	4.44844	4.46417	4.40107	4.38006	4.45752	4.34941	4.14972						5.59262	5.93066	6.51268	6.37443	3.58047	3.4944	3.87204	3.87233	3.72373								4.19815
68	5.92995	6.53514	6.83521	6.61907	4.30206	4.44159	4.2873	4.41241									6.62254	7.02721	7.71536	8.1542	4.52513	4.56562	4.50276	4.52549	4.62215	4.55143	4.38872						5.5257	5.88283	6.47627	6.33294	3.63164	3.53107	3.96905	3.98143	3.81911								4.23869
72	6.01777	6.57488	6.89887	6.70929	4.3851	4.52035	4.25671	4.42314									6.52789	6.94889	7.63061	8.00143	4.51169	4.60094	4.54055	4.6704	4.7811	4.74731	4.6074						5.43004	5.81792	6.43402	6.25303	3.64988	3.60864	4.01189	4.07562	3.97102								4.29801
76	6.21804	6.70579	7.07052	6.86234	4.50301	4.57927	4.35311	4.58645									6.63811	6.96696	7.67261	8.12279	4.50169	4.59466	4.48898	4.67544	4.73495	4.8666	4.76255						5.43054	5.76188	6.34796	6.19784	3.6294	3.57651	4.00229	4.11037	4.04508								4.30686
80	6.30128	6.86408	7.24406	7.06595	4.6406	4.76041	4.44952	4.68694									6.6172	6.88223	7.62192	8.20639	4.47807	4.56278	4.4543	4.7063	4.8727	4.9863	4.87362						5.33724	5.58061	6.28377	6.16076	3.60333	3.59635	4.08245	4.16875	4.12791								4.25372
84	6.48887	7.12186	7.58934	7.36405	4.81606	5.00844	4.66183	4.93894									6.67712	6.853	7.63446	8.30983	4.50073	4.56052	4.42847	4.83879	4.99549	5.14549	5.07602						5.30836	5.59405	6.30727	6.19257	3.58367	3.66144	4.16142	4.26906	4.22858								4.22484
88	6.50907	7.25373	7.80989	7.52201	4.89644	5.13545	4.77972	5.02086									6.71739	6.80822	7.59254	8.36789	4.58777	4.63594	4.47473	4.89332	5.05917	5.25618	5.17447						5.29535	5.51643	6.27397	6.23563	3.58103	3.61459	4.14347	4.29544	4.34094								4.18422
92	6.69444	7.36647	7.94912	7.7404	5.08241	5.45272	5.07015	5.30948									6.70048	6.74142	7.56247	8.49996	4.57208	4.65618	4.48784	5.01656	5.26653	5.46296	5.46516						5.29642	5.53351	6.29964	6.30326	3.55755	3.69709	4.28856	4.40461	4.46932								4.23032
96	6.95598	7.57576	8.17551	8.00871	5.07366	5.23426	4.95937	5.15995									6.80636	6.77957	7.5318	8.54406	4.58439	4.60937	4.47645	4.97464	5.19105	5.43634	5.32348						5.30757	5.50465	6.26416	6.32743	3.55409	3.51066	4.20205	4.26182	4.32317								4.2696
100	7.17814	7.6949	8.48063	8.34313	5.19276	5.39171	4.96748	5.28717									6.85049	6.78123	7.54487	8.61172	4.53969	4.62424	4.48841	5.01216	5.19092	5.38966	5.51107						5.26074	5.56156	6.26346	6.40025	3.54596	3.56845	4.24808	4.22489	4.39653								4.29817
104	6.88047	7.3533	8.13418	8.29717	5.23715	5.53385	5.10053	5.45809									6.86536	6.78374	7.51541	8.63964	4.52063	4.62295	4.44167	5.02963	5.1587	5.46087	5.61551						5.31815	5.508	6.30766	6.41954	3.56746	3.62586	4.19858	4.29495	4.51859								4.33511
108	6.71553	7.26168	7.89138	7.80541	5.39077	5.56239	5.28922	5.59048									6.84045	6.69599	7.39719	8.60284	4.51754	4.56868	4.43559	5.05648	5.25725	5.55779	5.68921						5.31215	5.46257	6.26665	6.36915	3.52396	3.62899	4.25488	4.34771	4.55799								4.35021
112	6.80342	7.21606	7.9055	7.8016	5.53704	5.70709	5.30886	5.67408									6.6224	6.58412	7.2699	8.49076	4.46986	4.5325	4.39639	5.23315	5.36374	5.5587	5.75811						5.26489	5.41162	6.21833	6.30365	3.54205	3.68774	4.3354	4.30219	4.58066								4.26757
116	6.7726	7.19118	7.84673	7.90792	5.63724	5.71998	5.39552	5.83609									6.51687	6.52307	7.20283	8.59705				5.27837	5.3785	5.68113	5.8988						5.20412	5.40115	6.19437	6.3649		3.72186	4.37049	4.34757	4.66119								4.26287
120	6.71995	7.1697	7.81502	7.79297	5.58444	5.57562	5.48011	5.95242									6.51505	6.46311	7.14171	8.48314				5.20837	5.29734	5.76303	6.01707						5.17323	5.3885	6.21032	6.46796		3.69562	4.30873	4.36234	4.69807								4.32188
124	6.73404	7.29752	7.81581	7.69435	5.50686	5.54842	5.4281	6.08633									6.57223	6.53646	7.15886	8.50115				5.19912	5.26138	5.73802	6.14337						5.22156	5.4292	6.24105	6.51047		3.68403	4.37877	4.32576	4.73802								4.29089
[truncated: 23 more columns]
