# Supplementary material for: Pathogenic mutations in the chromokinesin KIF22 disrupt anaphase chromosome segregation
Source: eLife journal article supplement (doi:10.7554/elife.78653), 2022-06-22
Supplement: supp [file F8 Anaphase T463.xlsx]

## Sheet: Sheet1
Time (Min)	KIF22-GFP																																KIF22-GFP T463D
-1	0.129	0.1935	0.7739	0.516	0.4515	0.4515	0.5805	0.1935	0.903	0.387	0.258	0.129	0.4515																				0.3225	0.4515	0.9675	0.1935	0.258	0.4515	0.645	0.387	0.5159	1.0964	0.4514	0.1935	1.2255	0.7095	0.1935	0.5805	0.0645
0	0.4515	0.516	0.6449	0.387	0.645	0.7095	0.129	0.7094	0.774	0.3225	0.774	0.3224	0.5159																				0.7095	1.2254	1.9994	0.0645	0.3225	0.0645	0.5805	0.3225	0.0645	0.3869	0.7095	0.4515	1.0965	1.032	0.129	1.0964	1.0319
1	0.258	0.4515	3.0958	0.8385	0.7094	2.5799	2.4509	0.4515	0.258	0.516	0.3225	2.6443	4.0633																				0.4515	0.1935	3.1604	0.258	0.3225	0.0645	1.032	0.5805	0.3225	1.548	0.4514	0.3869	1.2254	0.774	1.0319	0.774	0.387
2	3.9343	4.7083	7.6107	0.9029	1.0319	4.9018	5.0952	1.6125	1.2899	1.9994	0.9674	3.8053	7.6107																				0.0645	5.6757	5.3533	0.903	0.3225	0.5805	1.1609	0.645	0.9029	3.1604	4.6438	0.4515	1.1609	0.5805	1.9349	0.774	1.032
3	8.4491	9.6101	11.0935	3.0314	0.387	6.8367	6.6432	4.7083	4.0634	7.7397	3.5474	6.4497	10.7065																				0.645	5.9982	6.9012	0.1935	0.0645	0.5159	3.0958	0.516	4.3858	6.1272	7.6107	1.7414	1.6769	0.1935	2.6444	3.9988	3.4829
4	11.481	11.416	12.899	4.6438	0.258	9.0296	9.0941	7.8042	7.3527	9.9326	7.2237	8.7071	12.835																				0.8384	6.3852	8.5136	0.258	0.8384	1.1609	4.9662	2.9024	8.3201	7.8687	7.7397	4.0633	1.6769	0.387	3.3539	4.5793	5.0308
5	13.222	12.061	14.641	6.7722	3.5474	10.255	11.158	9.8681	9.6101	11.61	7.6107	10.513	14.318																				0.387	6.7722	7.6107	0.258	0.903	2.6444	6.9012	3.3539	8.4491	8.9006	8.2557	5.0308	0.774	0.516	5.2243	5.0307	4.5793
6	13.609	12.577	15.737	8.2556	3.5474	11.158	12.254	11.223	9.9325	13.158	8.3846	12.384	15.608																				0.4514	6.1917	8.1266	0.8384	1.3544	4.3858	8.4491	4.3213	8.7716	8.5781	8.1912	6.6432	0.7095	0.129	4.1924	4.9018	3.7409
7	14.318	12.512	16.253	9.2231	8.9651	12.061	13.351	12.125	12.061	14.189	9.9326	13.287	16.189																				0.387	5.8692	6.9657	0.5805	3.5473	5.0308	8.8361	4.6438	8.4491	9.1586	7.3526	7.2237	0.903	0.1935	3.6119	3.4829	1.7415
8	15.802	13.673	17.414	9.5456	9.3521	12.448	14.125	12.577	11.481	14.834	10.513	14.06	16.705																				0.1935	6.9657	6.2562	0.516	3.5473	6.1917	8.4492	3.5474	9.0941	8.6426	7.6107	7.5461	1.29	0.387	2.9669	3.8053	1.8705
9	16.447	14.641	18.317	9.9971	9.2231	12.706	14.576	12.964	11.996	15.35	10.9	14.318	17.092																				0.4515	6.9657	8.1266	0.645	4.3213	7.2881	7.2881	4.1923	9.5456	8.7716	7.9976	7.6752	0.903	0.258	2.9024	3.7408	1.7414
10	17.092	14.512	19.027	9.9326	9.3521	13.222	15.35	13.029	12.383	15.608	11.223	14.447	16.511																				0.6449	8.2557	9.6746	1.3545	4.6438	7.3527	7.6106	4.9018	9.61	10.126	9.4166	7.2236	2.6444	0.4515	2.3864	4.0633	2.1929
11	17.221	13.609	19.22	10.126	11.158	13.48	15.608	13.996	13.093	15.415	10.126	14.963	17.608																				0.129	8.1267	10.707	2.7089	4.6438	7.7396	9.0296	5.9337	10.836	11.674	10.642	7.8041	2.5154	0.129	2.5799	4.1278	4.7728
12	18.833	13.544	19.93	10.191	11.61	14.189	15.35	14.576	13.544	15.608	10.707	15.415	17.866																				0.387	8.2556	11.352	2.5799	4.9017	8.4491	9.8036	4.9663	12.061	12.577	11.094	8.7716	3.7409	0.645	2.9669	4.7728	5.6758
13	17.608	12.577	19.091	10.513	11.674	14.512	15.802	14.189	13.738	15.737	10.965	15.673	18.575																				0.129	8.9006	11.158	3.6763	4.9663	8.5781	9.4165	5.3532	12.899	12.383	11.351	8.9006	5.1598	0.9029	4.5148	5.0307	6.4497
14	17.801	15.35	19.349	11.416	11.932	14.77	15.35	15.286	13.867	16.189	11.674	15.802	18.898																				0.6449	9.352	10.836	4.2569	5.0953	9.2231	10.32	4.9018	12.383	12.706	11.61	8.9006	5.6113	1.29	5.0953	4.8373	7.0947
15	17.027	15.221	19.22	12.255	12.448	14.705	15.544	15.157	13.867	16.511	11.932	15.737	19.414																				0.516	9.1586	11.094	4.8373	5.4822	10.126	11.094	3.4184	12.835	12.77	11.416	10.836	7.2237	1.1609	6.3207	7.8687	8.2556
[truncated: 39 more columns]
