# Supplementary material for: Pathogenic mutations in the chromokinesin KIF22 disrupt anaphase chromosome segregation
Source: eLife journal article supplement (doi:10.7554/elife.78653), 2022-06-22
Supplement: supp [file F8 FS1 Anaphase Broadness T463.xlsx]

## Sheet: Sheet1
Minutes After Anaphase Onset	KIF22-GFP																																																KIF22-GFP T463A
3	5.49168	5.77699	8.69619	6.61597	4.92874	4.32098	5.93355	6.65781	4.54897	5.62482	6.94153	6.60448	7.19658	6.56632	6.49242	5.79783	3.59488	6.84996	6.33299	4.79694	6.0446	6.08398	4.71216	5.18069																									5.86113
4	4.6451	3.9611	8.0334	6.8615	4.812	4.0801	6.2409	6.0231	4.1265	4.67	6.0715	5.8719	6.826	5.7488	6.3611	5.3443	5.8065	3.5688	5.6659	4.7488	5.6537	5.7831	4.0499	4.2988																									5.9097
5	3.2788	3.7116	7.5347	7.1705	4.496	3.9726	5.9998	5.5548	3.7741	4.305	5.8397	5.3405	6.1591	5.0164	5.725	5.0253	6.7161	6.3821	5.2829	4.5555	4.9934	4.7992	3.6871	3.7136																									5.9544
6	3.296	3.7423	6.5129	7.8772	4.2197	3.5982	5.9998	5.5548	3.6519	3.3271	4.8079	4.7894	5.947	3.8668	5.3548	4.8581	6.6784	5.2851	5.2718	4.4219	4.7041	4.4609	3.5569	3.5196																									5.8264
7	3.4029	4.0357	6.4969	7.6991	3.8132	3.2823	2.9838	5.0032	3.4943	3.3784	4.3703	4.5291	5.5002	3.824	4.3169	4.3226	7.7183	5.0362	5.152	3.7857	4.4367	3.9908	3.484	3.4699																									5.8519
8	3.4489	4.0198	6.6804	8.1464	3.6001	3.1275	3.4347	4.8141	3.3431	3.4749	3.7566	4.1825	4.8874	4.0101	4.258	4.3225	7.1089	4.6122	5.3747	4.4715	4.2305	4.0709	3.6478	3.5673																									5.9387
9	3.6647	4.2207	5.4335	8.2428	3.4604	3.0971	4.2133	4.4766	3.4048	3.5217	3.9371	3.9607	4.2377	4.1257	3.9382	4.0284	7.2757	5.0088	4.0279	4.3951	4.0634	3.8441	3.8477	3.8071																									6.2755
10	3.9705	4.3003	6.0219	8.0231	3.6452	3.1833	4.5743	4.5901	3.5842	3.5182	4.0222	4.2665	4.3945	4.2796	4.0057	4.1979	7.7801	4.9058	5.8136	4.9789	4.1079	4.3557	4.1181	4.2765																									6.4147
11	4.6395	4.6918	6.0605	7.4124	3.6337	3.1359	5.015	4.8035	3.7845	3.7336	4.4202	4.5147	4.3245	4.8448	4.2294	4.4739	7.8528	4.7271	6.4491	5.435	4.3664	4.4604	4.6724	4.7727																									6.4441
12	5.0306	5.0341	5.6634	7.8135	3.4951	3.1954	5.105	5.0622	4.1072	4.127	4.7792	4.8583	4.389	5.1415	4.5145	4.623	8.2039	4.4572	7.7266	5.3429	4.68	5.1093	5.363	5.1665																									6.5829
13	5.45	5.1828	6.2241	7.6551	3.7434	3.4677	5.0164	5.2443	4.5676	4.2899	5.0374	5.1696	4.4893	5.5367	4.7254	5.0106	8.2177	5.4453	8.4826	5.9695	4.8629	5.5027	5.4767	5.2303																									6.8413
[truncated: 47 more columns]
