# Supplementary material for: Pathogenic mutations in the chromokinesin KIF22 disrupt anaphase chromosome segregation
Source: eLife journal article supplement (doi:10.7554/elife.78653), 2022-06-22
Supplement: supp [file F8 FS1 KIF22 Expression Level T463.xlsx]

## Sheet: Sheet1
Control Knockdown, Untreated
GFP	KIF22-GFP	KIF22-GFP T463D	KIF22-GFP T463A
0.752013	0.912115	0.993338	0.938716
0.621753	0.811831	1.01075	1.09575
0.820463	1.13107	0.965504	0.893538
0.508569	1.10221	1.12379	1.072
1.18312	1.04278	1.0449
1.03593		0.861711
2.83545
0.793238
0.759802
0.796604
0.893068
0.995254	0.981767	1.22147	0.897469
0.978453	1.17802	0.860443	1.09756
1.05528	0.552606	0.866904	0.936
0.982362	0.484675	0.926675	0.890517
0.839497	0.712802	1.12924	0.88247
0.741978	1.0548	0.764952	1.10066
1.03938	1.33512	1.02331	1.06884
0.989205	1.09251	1.07869	1.02729
1.10765	1.2813	1.03828	0.814685
1.05241	1.3264	1.09003	0.938392
1.21854			1.15239
			1.14506
			1.04868
0.996332	0.956216	0.72055	0.770694
0.813449	1.23189	1.02969	0.954658
0.987026	1.09973	0.980014	0.891393
0.986387	1.06391	0.742001	1.04147
1.06008	0.926728	1.15242	1.16057
1.14797	0.917118	1.14901	1.14386
1.17897	0.847474	1.19929	1.10355
0.98713	0.612982	1.15278	1.08377
0.991204	1.03127	1.06491	1.02125
0.851449	1.31268	0.93511	0.783767
		0.859844	0.985757
		1.01438	1.02556
			1.04575
			0.987941
Control Knockdown, Doxycycline
GFP	KIF22-GFP	KIF22-GFP T463D	KIF22-GFP T463A
0.967466	1.19086	1.59461	3.27206
0.912106	1.52621	1.80442	3.84937
0.749631	2.97863	1.63457	1.63512
0.784022	2.4579	0.831133	2.46502
0.928782	1.27372		1.12094
0.839914
0.771153
0.913475
0.970128
0.930937	1.90571	1.40713	2.50595
0.699414	1.11279	1.81696	2.81192
0.931661	1.45869	1.91605	2.10016
1.3192	3.67699	1.55012	4.08
1.45166	1.38307	1.2835	1.86869
1.1005	2.53412	1.04361	1.25846
1.11622	2.37157	2.92957	1.49815
1.55808	1.34311	1.04089	2.48557
0.795465	2.00573	1.58082	4.92064
	2.11088	1.55518	4.03307
			3.45564
			2.86944
1.01336	2.07718	1.01079	2.36567
1.05286	4.62558	1.3242	1.94819
0.955584	6.57445	1.29931	1.72589
0.873674	4.65277	0.833947	0.906794
0.685939	1.691	1.68361	3.73663
0.67911	1.46426	1.06191	1.9709
0.590276	7.1339	1.57334	1.43189
1.231	1.53219	1.58472	2.72467
1.10861	2.30824	2.96403	2.00791
0.881719	3.90592	1.03138	3.61358
0.879375	2.84914	0.72055	2.22719
	2.83227	1.02969	2.2172
		0.980014
KIF22 Knockdown, Untreated
GFP	KIF22-GFP	KIF22-GFP T463D	KIF22-GFP T463A
0.163178	0.186528	0.160865	0.127687
0.16097	0.204939	0.12636	0.13899
0.182471	0.160845	0.145061	0.122602
0.161626	0.177502	0.138902	0.137111
0.138503	0.216769	0.150617	0.146262
0.160351			0.171639
0.150561			0.125972
0.167441
0.158681	0.187001	0.153439	0.13323
0.177762	0.172774	0.160237	0.114765
0.177276	0.171122	0.135522	0.107273
0.157637	0.130123	0.146785	0.13825
0.150588	0.141197	0.148074	0.150003
0.165833	0.133602	0.136393	0.145741
0.186416	0.172188	0.146266	0.133978
0.150355	0.153103	0.144229	0.1601
	0.159294	0.136517	0.140873
		0.172473	0.16508
			0.142618
0.120102	0.136473	0.160851	0.124683
0.128311	0.156457	0.17449	0.143959
0.121121	0.214116	0.159159	0.118352
0.119331	0.192176	0.181584	0.148045
0.124341	0.204524	0.131173	0.15474
0.127563	0.149068	0.158461	0.155728
0.082162	0.214269	0.172849	0.184337
0.101566	0.213223	0.136684	0.140644
0.086126	0.244199
	0.181944
	0.177837
	0.173406
KIF22 Knockdown, Doxycycline
GFP	KIF22-GFP	KIF22-GFP T463D	KIF22-GFP T463A
0.135446	3.11505	1.20696	0.229649
0.151607	1.25945	4.02268	1.02689
0.15465	0.685439	3.43608	1.62455
0.140836	1.91659	2.03623	2.41229
0.140657	3.01909	1.758	1.44595
0.147726	1.36152
0.155295	1.9339
0.134697	1.8112
0.143933
0.201363	1.00896	0.881499	5.54024
0.157567	1.8238	0.882043	2.22195
0.180735	2.6535	0.376144	3.76016
0.182377	2.23671	1.89847	0.927098
0.155126	0.952205	0.831634	3.48222
0.167487	1.80985	2.03046	1.84071
0.21039	0.688288	1.91611	0.267455
0.208041	2.46517	0.92699	2.36564
0.147711	1.30893	1.05984	2.45845
0.206939		1.41831	3.9819
		2.58788	1.77558
			1.24576
0.073001	5.18146	1.37023	2.42591
0.080351	2.36273	1.33669	0.243869
0.081506	0.733291	1.95666	2.04649
0.094257	2.26735	1.27695	4.64166
0.095673	2.66088	1.90736	1.7977
0.093627	1.855	3.11509	3.20804
0.09899	3.20747	2.36841	3.74358
0.085935	0.786466	1.17827	6.00431
0.078243	2.56195	1.34634	1.88655
	3.26121	0.930761
	3.22335	1.20478
		1.21378
		1.56811
		1.327
		3.896
