# Supplementary material for: Pathogenic mutations in the chromokinesin KIF22 disrupt anaphase chromosome segregation
Source: eLife journal article supplement (doi:10.7554/elife.78653), 2022-06-22
Supplement: supp [file F8 Nuclear Solidity T463.xlsx]

## Sheet: Sheet1
GFP + Control KD	GFP + KIF22 KD	WT + Control KD	WT + KIF22 KD	T463D + Control KD	T463D + KIF22 KD	T463A + Control KD	T463A + KIF22 KD
0.961	0.981	0.969	0.971	0.885	0.926	0.847	0.959
0.97	0.97	0.968	0.969	0.956	0.909	0.897	0.95
0.965	0.962	0.97	0.967	0.977	0.933	0.954	0.961
0.974	0.971	0.964	0.973	0.952	0.929	0.944	0.961
0.978	0.971	0.962	0.966	0.919	0.901	0.957	0.966
0.977	0.97	0.957	0.973	0.978	0.946	0.973	0.954
0.971	0.968	0.965	0.962	0.929	0.955	0.95	0.924
0.963	0.964	0.97	0.961	0.877	0.914	0.953	0.952
0.971	0.974	0.969	0.956	0.918	0.826	0.944	0.925
0.955	0.962	0.97	0.955	0.964	0.953	0.957	0.96
0.96	0.972	0.97	0.937	0.959	0.94	0.972	0.955
0.974	0.974	0.97	0.962	0.931	0.93	0.976	0.942
0.963	0.971	0.977	0.959	0.771	0.946	0.957	0.923
0.963	0.977	0.964	0.971	0.86	0.97	0.958	0.931
0.959	0.973	0.966	0.97	0.947	0.929	0.966	0.941
0.97	0.972	0.973	0.978	0.818	0.915	0.963	0.967
0.967	0.973	0.961	0.973	0.832	0.957	0.922	0.956
0.961	0.973	0.974	0.976	0.951	0.968	0.966	0.936
0.966	0.969	0.965	0.98	0.953	0.968	0.973	0.903
0.98	0.977	0.952	0.97	0.97	0.865	0.961	0.952
0.966	0.977	0.967	0.976	0.955	0.954	0.887	0.947
0.948	0.969	0.965	0.977	0.771	0.874	0.965	0.952
0.973	0.975	0.945	0.96	0.957	0.936	0.955	0.962
0.971	0.972	0.976	0.956	0.854	0.946	0.953	0.957
0.977	0.98	0.945	0.97	0.894	0.8	0.925	0.952
0.966	0.979	0.968	0.964	0.927	0.956	0.947	0.958
0.961	0.963	0.965	0.97	0.882	0.963	0.939	0.962
0.958	0.97	0.971	0.96	0.951	0.836	0.96	0.944
0.969	0.959	0.971	0.956	0.949	0.918	0.957	0.962
0.965	0.969	0.964	0.955	0.842	0.964	0.951	0.966
0.974	0.969	0.962	0.971	0.965	0.925	0.944	0.961
0.972	0.974	0.965	0.978	0.902	0.763	0.945	0.952
0.948	0.965	0.976	0.962	0.925	0.883	0.96	0.969
0.969	0.969	0.961	0.97	0.938	0.854	0.959	0.958
0.971	0.919	0.948	0.978	0.944	0.949	0.956	0.934
0.977	0.978	0.977	0.978	0.957	0.87	0.935	0.956
0.976	0.971	0.937	0.958	0.876	0.899	0.947	0.967
0.969	0.977	0.96	0.966	0.95	0.937	0.953	0.955
0.973	0.933	0.97	0.978	0.951	0.906	0.963	0.942
0.97	0.966	0.978	0.971	0.923	0.901	0.951	0.897
0.958	0.954	0.962	0.971	0.899	0.95	0.961	0.956
0.961	0.933	0.925	0.972	0.92	0.931	0.937	0.955
0.969	0.969	0.942	0.97	0.922	0.913	0.948	0.964
0.973	0.959	0.962	0.963	0.89	0.937	0.972	0.949
0.962	0.899	0.967	0.978	0.957	0.9	0.976	0.953
0.971	0.962	0.977	0.971	0.906	0.783	0.943	0.959
0.971	0.963	0.931	0.965	0.773	0.938	0.956	0.959
0.972	0.965	0.954	0.975	0.941	0.909	0.956	0.968
0.98	0.968	0.964	0.968	0.924	0.933	0.967	0.952
0.98	0.974	0.95	0.963	0.935	0.886	0.939	0.945
0.964	0.972	0.971	0.966	0.905	0.909	0.961	0.947
0.977	0.966	0.973	0.965	0.901	0.91	0.94	0.888
0.949	0.977	0.962	0.96	0.913	0.867	0.935	0.935
0.978	0.975	0.964	0.974	0.963	0.967	0.95	0.952
0.97	0.972	0.923	0.965	0.886	0.895		0.962
0.955	0.97	0.958	0.939	0.954	0.955		0.895
0.963	0.977	0.945	0.966	0.936	0.932		0.968
	0.976	0.957	0.962	0.959	0.939		0.965
	0.966	0.962	0.966	0.972	0.922		0.947
	0.969	0.968	0.966	0.952	0.953
	0.97	0.971	0.965	0.898	0.971
	0.975	0.975	0.973	0.951	0.939
	0.96	0.963	0.952	0.957	0.952
	0.962		0.973	0.847	0.946
	0.959		0.975	0.903	0.872
	0.97		0.969	0.933	0.924
	0.977		0.961	0.964	0.847
	0.969		0.953	0.947	0.868
	0.978		0.969	0.939	0.944
	0.97		0.958	0.907	0.931
	0.965		0.977	0.925	0.893
	0.98		0.94	0.857	0.864
	0.97		0.965	0.959	0.869
	0.974		0.947	0.93	0.868
	0.974		0.973	0.849	0.849
	0.973		0.958	0.963	0.904
	0.973		0.973	0.82	0.914
	0.961		0.951	0.836	0.924
	0.969		0.97	0.871	0.901
	0.975		0.971	0.963	0.886
			0.956	0.963	0.958
			0.959	0.903	0.965
			0.98		0.974
			0.956		0.912
			0.976		0.914
			0.975		0.93
			0.98		0.943
					0.858
					0.938
					0.934
					0.921
					0.874
					0.913
					0.927
					0.957
					0.921
					0.891
					0.906
					0.932
					0.885
					0.934
					0.948
0.978	0.97	0.972	0.967	0.898	0.976	0.97	0.966
0.971	0.97	0.976	0.971	0.925	0.853	0.922	0.973
0.977	0.973	0.975	0.974	0.921	0.93	0.969	0.958
0.976	0.963	0.966	0.97	0.952	0.972	0.96	0.966
0.973	0.975	0.977	0.967	0.738	0.752	0.967	0.961
0.974	0.968	0.978	0.963	0.974	0.957	0.965	0.967
0.977	0.977	0.973	0.968	0.972	0.976	0.969	0.965
0.977	0.976	0.978	0.961	0.978	0.946	0.837	0.971
0.975	0.968	0.97	0.971	0.928	0.921	0.914	0.943
0.978	0.972	0.979	0.977	0.887	0.8	0.939	0.97
0.973	0.909	0.976	0.963	0.824	0.917	0.94	0.955
0.969	0.954	0.982	0.969	0.972	0.949	0.976	0.939
0.978	0.973	0.947	0.967	0.962	0.863	0.961	0.964
0.976	0.96	0.971	0.965	0.973	0.846	0.964	0.964
0.978	0.97	0.977	0.97	0.968	0.886	0.976	0.956
0.979	0.98	0.979	0.976	0.964	0.97	0.968	0.921
0.974	0.97	0.969	0.967	0.925	0.962	0.971	0.963
0.98	0.961	0.973	0.967	0.956	0.961	0.919	0.945
0.965	0.972	0.974	0.952	0.889	0.842	0.975	0.972
0.897	0.98	0.95	0.969	0.97	0.954	0.933	0.962
0.979	0.977	0.973	0.952	0.826	0.84	0.964	0.864
0.983	0.978	0.973	0.978	0.973	0.898	0.976	0.972
0.978	0.975	0.962	0.974	0.902	0.925	0.969	0.962
0.967	0.978	0.973	0.976	0.892	0.917	0.971	0.967
0.975	0.975	0.964	0.967	0.883	0.676	0.96	0.969
0.975	0.971	0.975	0.965	0.96	0.963	0.967	0.961
0.981	0.978	0.97	0.965	0.932	0.975	0.977	0.945
0.977	0.977	0.975	0.977	0.756	0.975	0.961	0.958
0.975	0.979	0.978	0.97	0.904	0.946	0.972	0.954
0.977	0.963	0.977	0.952	0.926	0.967	0.971	0.971
0.969	0.974	0.961	0.967	0.846	0.964	0.98	0.967
0.971	0.977	0.978	0.956	0.964	0.966	0.979	0.939
0.981	0.981	0.961	0.966	0.965	0.969	0.97	0.969
0.978	0.972	0.973	0.973	0.82	0.816	0.963	0.948
0.977	0.971	0.973	0.961	0.905	0.909	0.962	0.97
0.979	0.98	0.976	0.976	0.933	0.915	0.98	0.967
0.964	0.97	0.977	0.963	0.948	0.97	0.974	0.965
0.977	0.977	0.886	0.956	0.927	0.955	0.978	0.965
0.96	0.976	0.975	0.969	0.822	0.951	0.976	0.972
0.971	0.976	0.946	0.971	0.94	0.964	0.973	0.967
0.975	0.979	0.967	0.96	0.928	0.913	0.974	0.96
0.971	0.98	0.964	0.964	0.969	0.976	0.973	0.967
0.98	0.95	0.955	0.953	0.88	0.864	0.967	0.957
0.982	0.96	0.977	0.968	0.876	0.96	0.971	0.95
0.971	0.949	0.962	0.971	0.948	0.976	0.973	0.976
0.98	0.967	0.972	0.959	0.937	0.961	0.962	0.952
0.966	0.977	0.973	0.964	0.724	0.971	0.975	0.954
0.976	0.975	0.974	0.963	0.961	0.96	0.976	0.971
0.976	0.967	0.971	0.966	0.905	0.932	0.972	0.952
0.971	0.978	0.957	0.965	0.95	0.931	0.969	0.973
0.944	0.979	0.975	0.968	0.96	0.96	0.976	0.974
0.977	0.981	0.966	0.962	0.954	0.856	0.974	0.943
0.976	0.972	0.975	0.972	0.95	0.944	0.948	0.963
0.972	0.974	0.974	0.975	0.965	0.949	0.976	0.967
0.98	0.97	0.95	0.953	0.96	0.941	0.972	0.965
0.972	0.953	0.962	0.981	0.963	0.926	0.953	0.964
0.92	0.977	0.975	0.955	0.892	0.925	0.977	0.976
0.972	0.978	0.961	0.978	0.954	0.947	0.97	0.909
0.974	0.966	0.974	0.965	0.955	0.819	0.975	0.962
0.954	0.964	0.974	0.959	0.955	0.833	0.947	0.942
0.972	0.978	0.969	0.966	0.953	0.964	0.975	0.966
0.976	0.975	0.971	0.956	0.958	0.888	0.963	0.965
0.974	0.979	0.972	0.974	0.965	0.897	0.94	0.92
0.975	0.974	0.971	0.97	0.933	0.796	0.969	0.919
0.972	0.977	0.954	0.973	0.859	0.957	0.976	0.967
0.965	0.968	0.978	0.966	0.888	0.919	0.947	0.925
0.979	0.971	0.977	0.97	0.963	0.839	0.978	0.951
0.967	0.98	0.958	0.973	0.957	0.869	0.978	0.965
0.976	0.965	0.975	0.969	0.92	0.799	0.981	0.971
0.977	0.977	0.963	0.976	0.938	0.921	0.978	0.959
0.962	0.978	0.951	0.978	0.94	0.889	0.978	0.952
0.979	0.98	0.972	0.964	0.904	0.899	0.974	0.963
0.96	0.968	0.977	0.98	0.876	0.929	0.974	0.966
0.98	0.968	0.962	0.976	0.92	0.913	0.971	0.968
0.98	0.976	0.978	0.952	0.894	0.789	0.974	0.952
0.975	0.974	0.945	0.96	0.894	0.934	0.969	0.961
0.98	0.973	0.966	0.943	0.914	0.9	0.976	0.915
0.976	0.974	0.978	0.982	0.911	0.808	0.964	0.961
0.97	0.965	0.972	0.962	0.933	0.903	0.939	0.963
0.973	0.972	0.966	0.956	0.902	0.963	0.975	0.908
0.967	0.957	0.971	0.951	0.906	0.912	0.976	0.952
0.948	0.97	0.945	0.948	0.915	0.891	0.976	0.868
0.977	0.963	0.954	0.976	0.949	0.892	0.971	0.962
0.98	0.96	0.965	0.976	0.907	0.926	0.972	0.939
0.981	0.971	0.978	0.981	0.946	0.847	0.969	0.962
0.971	0.95	0.968	0.974	0.976	0.843	0.959	0.967
0.968	0.966	0.974	0.97	0.98	0.889	0.956	0.967
0.981	0.963	0.969	0.978	0.972	0.846	0.961	0.958
0.968	0.977	0.977	0.973	0.975	0.94	0.95	0.963
0.974	0.975	0.97	0.978	0.907	0.849	0.907	0.96
0.98	0.96	0.966	0.98	0.948	0.967	0.974	0.969
0.975	0.973	0.976	0.967	0.896	0.89	0.944	0.959
0.978	0.976	0.976	0.978	0.943	0.853	0.945	0.944
0.977	0.955	0.981	0.979	0.914	0.929	0.944	0.949
0.973	0.978	0.968	0.959	0.882	0.97	0.965	0.961
0.977	0.976	0.975	0.966	0.88	0.842	0.923	0.96
0.979	0.977	0.957	0.964	0.963	0.835	0.911	0.965
0.963	0.979	0.967	0.978	0.965	0.779	0.948	0.953
0.973	0.973	0.973	0.973	0.904	0.92	0.953	0.96
0.972	0.97	0.969	0.964	0.969	0.915	0.894	0.965
0.982	0.975	0.976	0.961	0.954	0.974	0.961	0.958
0.977	0.957	0.978	0.946	0.961	0.938	0.972	0.951
0.975	0.959	0.98	0.968	0.935	0.926	0.941	0.925
0.98	0.968	0.972	0.972	0.959	0.931	0.897	0.96
0.974	0.974	0.974	0.977	0.971	0.82	0.979	0.957
0.973	0.972	0.976	0.971	0.951	0.923	0.976	0.946
0.972	0.97	0.971	0.964	0.959	0.952	0.967	0.93
0.974	0.975	0.981	0.967	0.871	0.939	0.959	0.975
0.973	0.97	0.966	0.975	0.945	0.908	0.92	0.95
0.971	0.978	0.969	0.935	0.793	0.948	0.972	0.95
0.973	0.972	0.969	0.979	0.909	0.941	0.971	0.946
0.977	0.972	0.972	0.978	0.902	0.871	0.965	0.959
0.972	0.973	0.972	0.981	0.835	0.903	0.954	0.969
0.974	0.966	0.93	0.955	0.855	0.849	0.975	0.971
0.977	0.974	0.966	0.972	0.966	0.854	0.963	0.938
0.976	0.972	0.973	0.971	0.942	0.779	0.963	0.96
0.978	0.972	0.962	0.974	0.908	0.92	0.975	0.966
0.972	0.975	0.97	0.974	0.881	0.807	0.967	0.878
0.965	0.965	0.979	0.976	0.903	0.883	0.973	0.949
0.968	0.968	0.972	0.965	0.963	0.87	0.955	0.969
0.975	0.977	0.962	0.954	0.906	0.812	0.968	0.968
0.963	0.938	0.963	0.976	0.814	0.806	0.969	0.968
0.975	0.971	0.96	0.954	0.922	0.88	0.974	0.975
0.976	0.978	0.934	0.976	0.912	0.88	0.956	0.971
0.977	0.977	0.978	0.972	0.879	0.961	0.973	0.962
0.969	0.973	0.965	0.97	0.843	0.836	0.975	0.973
0.98	0.965	0.956	0.977	0.952	0.899	0.924	0.969
	0.975	0.97	0.968	0.884	0.778	0.921	0.932
	0.963	0.975	0.976	0.926	0.95	0.929	0.885
	0.971	0.964	0.981	0.88	0.938	0.953	0.968
	0.975	0.974	0.973	0.805	0.753	0.969	0.944
	0.957	0.974	0.97	0.816	0.889	0.964	0.96
	0.975	0.974	0.963	0.897	0.908	0.968	0.957
	0.957	0.973	0.967	0.958	0.911	0.904	0.974
	0.958	0.974	0.97		0.853	0.964	0.963
	0.972	0.975	0.969		0.923	0.973	0.967
	0.973	0.965	0.971		0.959	0.961	0.962
	0.969	0.98	0.97		0.942	0.977	0.978
	0.971	0.964	0.98		0.942	0.978	0.966
	0.974	0.975	0.972		0.912	0.97	0.906
	0.968	0.977	0.971		0.958	0.969	0.899
	0.977	0.944	0.975		0.849	0.972	0.924
	0.974	0.977	0.967		0.964	0.97	0.958
	0.972	0.974			0.928	0.964	0.929
	0.977	0.974			0.969	0.976	0.933
	0.975	0.96			0.976	0.975	0.944
	0.977	0.967			0.973	0.97	0.965
	0.975	0.978			0.971	0.975	0.938
	0.978	0.868			0.873		0.966
	0.977	0.976			0.961		0.966
		0.972			0.942		0.97
		0.967			0.965		0.95
		0.97			0.875		0.964
		0.968			0.788		0.96
		0.965			0.968		0.957
					0.964		0.947
					0.904		0.957
					0.976		0.976
					0.957		0.971
					0.86		0.944
					0.957		0.964
					0.938		0.978
					0.892		0.978
					0.834		0.976
							0.955
							0.942
							0.954
							0.963
							0.943
							0.974
							0.963
							0.97
							0.961
							0.967
							0.972
							0.968
							0.969
							0.926
							0.965
							0.965
							0.974
							0.973
							0.967
							0.975
							0.949
							0.964
							0.971
							0.959
							0.943
							0.949
							0.969
							0.941
							0.955
							0.969
							0.973
							0.963
							0.976
							0.907
							0.939
							0.968
							0.975
							0.97
							0.964
							0.962
							0.932
							0.973
							0.959
							0.948
							0.969
							0.973
							0.967
							0.962
0.956	0.959	0.968	0.964	0.96	0.954	0.971	0.947
0.978	0.958	0.958	0.973	0.896	0.961	0.962	0.971
0.974	0.966	0.969	0.967	0.805	0.952	0.954	0.961
0.976	0.965	0.97	0.974	0.944	0.927	0.955	0.972
0.961	0.966	0.97	0.97	0.934	0.94	0.947	0.961
0.975	0.96	0.976	0.957	0.966	0.975	0.934	0.966
0.967	0.964	0.961	0.977	0.935	0.906	0.948	0.953
0.949	0.961	0.935	0.957	0.905	0.958	0.95	0.969
0.971	0.961	0.973	0.976	0.947	0.921	0.963	0.972
0.966	0.958	0.967	0.966	0.923	0.935	0.926	0.955
0.965	0.953	0.955	0.965	0.927	0.855	0.959	0.955
0.963	0.973	0.972	0.974	0.9	0.923	0.957	0.956
0.98	0.96	0.949	0.958	0.797	0.926	0.934	0.945
0.96	0.967	0.96	0.955	0.97	0.895	0.956	0.946
0.972	0.952	0.98	0.957	0.916	0.955	0.956	0.958
0.975	0.977	0.972	0.97	0.836	0.929	0.95	0.97
0.974	0.962	0.972	0.975	0.912	0.804	0.966	0.953
0.982	0.944	0.963	0.967	0.954	0.927	0.968	0.972
0.969	0.967	0.964	0.977	0.946	0.847	0.97	0.966
0.971	0.962	0.961	0.965	0.966	0.949	0.976	0.93
0.969	0.925	0.97	0.976	0.967	0.946	0.954	0.968
0.965	0.971	0.972	0.974	0.906	0.795	0.874	0.967
0.956	0.977	0.977	0.97	0.91	0.734	0.957	0.961
0.961	0.967	0.967	0.962	0.964	0.91	0.939	0.959
0.962	0.961	0.966	0.955	0.911	0.849	0.977	0.933
0.968	0.977	0.974	0.955	0.962	0.954	0.959	0.963
0.959	0.97	0.943	0.974	0.971	0.969	0.971	0.946
0.951	0.949	0.965	0.963	0.972	0.962	0.926	0.946
0.957	0.971	0.965	0.974	0.967	0.951	0.971	0.973
0.97	0.969	0.926	0.955	0.974	0.934	0.948	0.96
0.955	0.967	0.946	0.951	0.946	0.958	0.964	0.969
0.925	0.973	0.937	0.964	0.966	0.934	0.962	0.952
0.928	0.963	0.97	0.96	0.949	0.911	0.914	0.965
0.952	0.975	0.971	0.968	0.975	0.958	0.961	0.961
0.956	0.964	0.964	0.959	0.911	0.82	0.966	0.975
0.973	0.968	0.959	0.94	0.968	0.906	0.953	0.973
0.954	0.97	0.968	0.978	0.792	0.938	0.955	0.964
0.956	0.971	0.973	0.956	0.958	0.885	0.967	0.964
0.962	0.964	0.968	0.956	0.936	0.963	0.967	0.937
0.961	0.975	0.966	0.947	0.967	0.938	0.924	0.955
0.958	0.969	0.938	0.968	0.952	0.925	0.961	0.969
0.977	0.952	0.966	0.947	0.913	0.889	0.955	0.944
0.963	0.975	0.95	0.96	0.96	0.906	0.979	0.959
0.97	0.96	0.971	0.962	0.825	0.929	0.971	0.967
0.959	0.974	0.963	0.931	0.963	0.884	0.963	0.964
0.969	0.967	0.964	0.97	0.968	0.965	0.956	0.78
0.968	0.972	0.954	0.95	0.777	0.922	0.96	0.95
0.963	0.973	0.967	0.967	0.876	0.909	0.943	0.952
0.971	0.954	0.971	0.958	0.906	0.891	0.97	0.967
0.955	0.965	0.972	0.962	0.967	0.962	0.958	0.966
0.963	0.971	0.946	0.972	0.974	0.966	0.945	0.95
0.957	0.971	0.957	0.97	0.856	0.969	0.961	0.938
0.97	0.957	0.946	0.966	0.899	0.966	0.959	0.959
0.977	0.968	0.966	0.971	0.856	0.889	0.955	0.883
0.965	0.965	0.97	0.966	0.935	0.931	0.935	0.96
0.961	0.975	0.948	0.964	0.971	0.955	0.95	0.962
0.967	0.953	0.967	0.97	0.963	0.957	0.943	0.964
0.965	0.962	0.962	0.964	0.847	0.925	0.961	0.964
0.956	0.921	0.967	0.957	0.843	0.963	0.97	0.957
0.978	0.965	0.942	0.922	0.968	0.933	0.964	0.946
0.926	0.971	0.97	0.965	0.913	0.948	0.947	0.944
0.968	0.967	0.947	0.967	0.896	0.814	0.93	0.964
0.979	0.965	0.964	0.933	0.826	0.863	0.957	0.949
0.979	0.953	0.972	0.972	0.769	0.884	0.953	0.955
0.976	0.964	0.949	0.969	0.944	0.919	0.955	0.943
0.978	0.97	0.967	0.959	0.833	0.904	0.96	0.955
0.968	0.968	0.943	0.969	0.907	0.865	0.964	0.97
0.964	0.971	0.965	0.969	0.934	0.909	0.949	0.96
0.973	0.968	0.969	0.968	0.956	0.886	0.917	0.964
0.98	0.959	0.973	0.966	0.966	0.922	0.966	0.955
0.967	0.963	0.953	0.967	0.938	0.847	0.947	0.961
0.975	0.95	0.955	0.958	0.944	0.822	0.949	0.97
0.966	0.952	0.973	0.973	0.965	0.895	0.923	0.949
0.975	0.964	0.955	0.945	0.882	0.947	0.938	0.948
0.963	0.964	0.969	0.963	0.922	0.942	0.951	0.923
0.967	0.952	0.965	0.957	0.974	0.972	0.951	0.934
0.967	0.966	0.971	0.957	0.895	0.894	0.942	0.953
0.95	0.968	0.973	0.968	0.898	0.914	0.967	0.896
0.96	0.949	0.973	0.958	0.967	0.897	0.97	0.958
0.971	0.963	0.972	0.947	0.874	0.964	0.931	0.971
0.969	0.954	0.957	0.954	0.898	0.939	0.942	0.962
0.968	0.957	0.968	0.96	0.968	0.877	0.944	0.961
0.967	0.963	0.968	0.958	0.945	0.933	0.972	0.955
0.97	0.958	0.974	0.953	0.976	0.923	0.956	0.958
0.969	0.97	0.961	0.96	0.908	0.923	0.956	0.963
0.965	0.969	0.977	0.951	0.807	0.874	0.97	0.957
0.947	0.92	0.972	0.947	0.815	0.818	0.973	0.956
0.949	0.972	0.955	0.965	0.915	0.912	0.967	0.927
0.967	0.962	0.974	0.957	0.873	0.931	0.953	0.927
0.956	0.932	0.964	0.943	0.96	0.894	0.949	0.957
0.953	0.958	0.96		0.943	0.967	0.951	0.969
0.948	0.966	0.954		0.882	0.961	0.967	0.956
0.967	0.96	0.966		0.86	0.96	0.97	0.949
0.973	0.969	0.941		0.954	0.903	0.973	0.949
0.97	0.954	0.967		0.83	0.97	0.955	0.908
0.964	0.96	0.963		0.942	0.954	0.953	0.967
0.964	0.952			0.893	0.956	0.969	0.945
0.962	0.951			0.967	0.921	0.942	0.961
0.949	0.966			0.874	0.961	0.975	0.972
0.965	0.97			0.936	0.932	0.958	0.96
0.961	0.961			0.908	0.96	0.927	0.971
0.969	0.969			0.847	0.958	0.973	0.969
0.96	0.977			0.858	0.954	0.962	0.962
0.961	0.963			0.94	0.956	0.929	0.928
0.957	0.972			0.931	0.899	0.948	0.954
0.968	0.951			0.772	0.959	0.938
0.953	0.964			0.932	0.954	0.97
0.968	0.961			0.933	0.84	0.975
0.969	0.968			0.945	0.825	0.952
0.963	0.97			0.939	0.962	0.906
0.952	0.944			0.794
0.968	0.961			0.835
0.961	0.935			0.93
0.963	0.953			0.814
0.965	0.965			0.873
0.958	0.954			0.799
0.959	0.957			0.956
0.974	0.949			0.784
0.969	0.917			0.863
0.959	0.973			0.909
0.961	0.966			0.747
0.961	0.956			0.935
0.955	0.967			0.962
0.963	0.961			0.973
0.971	0.969			0.967
0.967	0.905			0.965
0.946	0.968			0.922
0.953	0.963			0.95
	0.952			0.952
	0.961			0.834
	0.96			0.951
	0.962			0.911
				0.914
				0.954
				0.906
				0.973
				0.881
				0.816
				0.862
				0.965
				0.937
				0.841
				0.933
				0.969
				0.931
