# Supplementary material for: Pathogenic mutations in the chromokinesin KIF22 disrupt anaphase chromosome segregation
Source: eLife journal article supplement (doi:10.7554/elife.78653), 2022-06-22
Supplement: supp [file F8 Polar Ejection Force T463.xlsx]

## Sheet: Sheet1
Control Knockdown						KIF22 Knockdown
GFP	KIF22-GFP	KIF22-GFP T463D	KIF22-GFP T463A			GFP	KIF22-GFP	KIF22-GFP T463D	KIF22-GFP T463A
3.4578	3.4578	3.9764	3.8035			2.0747	3.8035	3.8035	2.9391
3.1984	3.4578	4.3222	3.6307			0.0864	3.4578	3.5442	2.6798
3.89	3.89	3.7171	3.8035			0.2593	4.1493	3.1984	3.1984
3.7171	3.8035	3.9764	3.8035			2.8527	3.5442	3.8035	2.9391
4.2358	3.9764	4.1493	4.2358			1.0373		4.668	3.1984
3.9764	3.9764	3.8035	3.4578			3.0255		3.112	3.2849
	3.0255	3.6307	3.6307					3.112	3.0255
		3.89	3.8035					3.89	2.8527
									3.112
4.3222	3.9764	3.8035	3.9764						3.1984
3.2849	3.9764	4.0629	3.8035						3.7171
3.5442	7.6071	5.2731	3.4578						1.6424
3.8035	3.89	5.1002	3.5442						2.7662
3.5442	3.7171	4.3222	3.9764
3.7171	4.668	5.5324	3.89			2.2475	2.8527	3.6307	2.9391
3.7171						2.334	3.3713	3.0255	2.8527
						0.6051	3.2849	3.0255	3.5442
3.8035	3.5442	4.0629	3.89			1.9018	3.2849	3.7171	3.0255
3.8035	4.0629	4.3222	3.3713			2.1611	3.0255	3.0255	2.2475
3.89	4.9273	4.3222	3.4578			0.6051	3.2849		3.0255
4.0629	4.1493	4.5815	3.8035			2.5933	3.112		1.8153
3.6307	3.7171	5.0138	3.2849			0.0864			3.0255
3.8035	4.2358	3.9764	3.6307
2.7662	4.1493	4.9273	3.6307			1.6424	3.3713		3.0255
3.5442	3.8035	4.5815	3.7171			1.8153	3.2849		3.2849
3.5442	3.8035	4.1493	4.4086			1.9882	3.2849		4.0629
3.8035	3.5442	4.0629	4.0629			2.7662	3.4578		2.1611
3.5442	4.4951	6.4833	3.5442			2.9391	3.7171		1.6424
3.7171	4.0629	5.0138	3.8035			2.0747	3.5442		3.1984
3.0255	4.1493	4.3222	3.89			0.0864	3.5442		3.3713
		4.2358	3.4578			2.8527	3.8035		3.5442
		4.4086	3.89			2.0747	3.5442		2.6798
						2.8527	3.2849		3.8035
							3.6307		3.1984
									2.2475
									3.5442
						3.5442	4.0629	3.8035	3.112
						1.0373	4.4951	3.89	4.0629
						0.6051	3.1984	4.4086	3.1984
						1.9882	3.3713	3.8035	3.89
						0.9509	4.1493	4.0629	3.0255
						2.2475	3.5442	3.8035	2.5069
						1.7289	3.4578	4.4086	2.2475
						2.7662	4.7544	3.9764	2.6798
						0.778	4.0629	4.3222	3.0255
						2.7662	3.7171	4.2358	3.8035
						1.9018	3.5442	3.2849	3.2849
							3.8035	3.1984	3.7171
							3.2849	3.3713	3.5442
							4.0629	2.9391
