# Supplementary material for: Pathogenic mutations in the chromokinesin KIF22 disrupt anaphase chromosome segregation
Source: eLife journal article supplement (doi:10.7554/elife.78653), 2022-06-22
Supplement: supp [file F9 Anaphase T158.xlsx]

## Sheet: Sheet1
Time (Min)	KIF22-GFP																	KIF22-GFP T158D																	KIF22-GFP T158A
-1	0.645	0.258	0.903	1.0319	0.129	0.7095	0.258	0.7095	0.7095	0.3225	0.5805	0.8384	2.2574					0.258	0.774	0.258	0.3225	0.6449	0.4515	0.2579	0.516	0.8385	0.5159	0.4515	0.129	0.516	0.4514	0.4515	0.129		0.8385	0.0645	0.129	0.5159	0.387	0.6449	0.645	0.129	0.516	0.5804	0.4514	0.645	0.774
0	0.8385	0.7095	0.4515	0.1935	0.7739	0.8385	0.4515	0.3225	1.3545	0.8384	0.0645	2.4509	0.903					0.7095	0.4514	0.5805	0.8385	0.7095	1.4189	0.5805	1.0964	0.129	0.3869	1.0319	0.5805	0.4515	0.5805	1.3544	1.2255		1.29	0.4514	0.387	1.2254	0.645	0.774	0.258	1.3544	0.129	2.4509	0.258	0.8384	3.4184
1	1.6124	0.774	1.8059	2.5154	0.7095	1.0319	5.2242	1.161	0.129	0.516	2.7088	4.3858	0.5159					0.3225	0.1935	0.645	0.9674	0.7094	3.0314	0.258	3.5473	0.903	0.1935	1.1609	0.7095	0.516	1.161	3.1603	2.0639		3.7408	0.516	4.6438	0.8385	1.806	2.2574	0.8385	1.6125	0.6449	1.9349	0.6449	1.419	5.8047
2	3.6764	0.8385	4.2568	6.2562	0.9674	2.1284	6.7077	3.0314	0.387	2.5799	5.0308	6.3207	0.9029					1.0319	3.6119	0.7739	0.6449	0.7094	4.4503	3.8053	5.0953	0.0645	4.8373	4.5148	0.387	0.774	1.161	6.9012	4.3213		5.3533	0.387	6.7722	0.645	6.3853	5.6757	4.3858	3.0314	0.7095	7.2237	4.7728	7.5461	7.0947
3	5.8047	0.516	7.9977	7.4817	3.4828	7.6107	9.3521	4.1278	5.3533	5.5467	5.9982	8.5781	5.9983					3.3539	4.6438	1.1609	4.3213	2.5154	6.6432	7.2237	6.9657	0.7739	7.6752	7.9331	5.8692	1.2255	4.4503	7.6752	5.6758		7.7397	1.6124	7.7397	0.0645	7.9976	8.2556	6.8367	4.7083	4.5793	9.2231	7.9331	10.1906	8.7072
4	7.7396	0.1935	10.5776	9.3521	7.2237	8.9651	10.5776	6.6432	8.8361	7.9331	8.7071	10.513	8.0621					4.1923	6.5142	3.9989	7.2237	3.8698	8.2557	7.6752	9.6746	2.0639	9.4811	8.1912	5.6758	5.0308	5.4178	7.6752	6.0628		9.7391	4.4503	9.352	0.3869	9.6746	9.9971	9.0941	6.0627	7.9976	9.9325	11.158	12.061	10.3195
5	9.0941	0.5805	12.1255	10.9645	8.9006	10.8356	13.0929	9.1586	9.6746	9.739	10.9645	11.4805	10.9645					5.8047	8.1266	5.3532	5.8047	5.5468	8.8361	7.9977	10.3841	2.5154	10.0616	8.3202	5.8048	4.3858	6.7077	7.6751	5.1598		11.2225	6.5142	11.2869	3.9988	11.029	12.061	10.8355	7.5462	9.5455	10.9	12.448	12.8995	11.7385
6	10.0615	0.7739	12.9639	11.9964	11.029	12.1254	13.9958	10.642	11.0936	9.4166	12.0609	12.1254	13.2219					7.4172	8.9651	6.1273	5.2243	6.5787	8.4491	8.1267	10.9645	5.8048	9.9971	7.9976	4.7728	3.9343	6.9657	7.8042	4.7727		12.2545	8.3847	11.932	4.1278	12.0609	13.0284	11.4805	9.4166	10.5775	11.029	14.4473	13.7379	12.2544
7	10.8355	0.8384	13.3509	12.8994	12.061	13.6734	14.8343	11.803	12.3835	10.0615	13.4799	12.3835	12.964					8.5136	9.1586	5.8693	4.4503	6.6432	8.0621	7.2237	10.5775	4.4503	9.4811	7.6752	3.8699	1.0965	6.1273	5.9982	4.1923		11.803	10.126	13.3509	8.5136	12.7705	13.8024	12.9639	11.416	11.287	11.3515	15.0924	13.9958	12.5769
8	10.771	0.5805	13.7379	13.2219	12.9639	13.6734	16.5113	12.061	12.5124	10.126	13.7379	12.5124	13.4799					9.0941	9.2876	5.3533	4.1278	6.1917	8.5136	6.9012	9.9971	3.1604	9.8036	8.3201	3.5473	1.0965	5.8693	5.2243	4.0633		12.5125	11.4805	14.4473	8.7716	12.9639	14.3828	13.8669	12.319	11.9965	12.1899	15.2859	13.0284	13.222
9	10.8355	2.3864	13.4799	13.4155	13.1574	14.3183	16.7692	11.932	12.319	9.4811	13.8024	12.6415	13.9959					8.1911	8.9651	5.5468	4.1278	6.3207	8.7716	7.6107	10.1905	1.3545	9.0296	9.6101	3.7409	1.2255	5.9337	5.1598	4.3213		12.5124	12.1255	14.8988	9.6745	13.4154	15.9308	14.2539	12.706	12.7704	12.5769	16.1888	13.2864	12.7059
10	11.0935	5.2888	13.8024	14.2539	13.6734	14.7054	14.8343	12.319	11.9965	9.4165	13.9959	12.706	14.5119					7.0947	8.9006	6.9012	5.4822	5.8048	10.0616	9.0296	10.6421	3.1604	8.7071	9.8036	4.9663	1.4834	6.3853	4.9663	4.9662		12.19	12.5125	14.5119	9.2876	12.5124	15.8018	14.5764	12.835	13.4154	12.4479	16.5112	12.3834	11.9965
11	11.4805	6.7077	14.2539	14.1894	14.3828	14.7698	14.7054	11.9319	13.0929	9.997	15.1568	13.2864	15.4148					6.6433	9.6746	8.3201	6.6432	5.8692	9.7391	10.255	11.6739	4.0633	9.9971	9.8036	6.7722	1.8704	7.2237	7.7396	5.6112		10.9645	13.1575	14.7698	9.9325	13.0929	15.9953	14.3829	13.0285	13.1574	12.2544	16.8982	11.674	11.4805
12	12.3189	8.1911	14.4474	13.6734	14.2538	14.4473	14.8989	12.1255	14.1893	10.5131	15.1568	14.2539	15.5438					7.2237	11.4804	9.0941	6.5142	6.3852	8.7071	10.7065	12.7059	5.3532	10.5775	9.481	7.2882	1.4189	7.2882	8.3847	6.3208		10.1906	12.8995	14.7054	10.255	13.1574	15.1568	15.2213	12.7059	13.9959	11.9319	15.8663	11.287	11.9965
13	11.9964	8.3201	14.7698	13.7379	13.7379	13.9314	16.6403	12.6414	14.4474	10.4485	16.1887	14.1893	15.0278					8.6427	12.1899	10.4485	7.4172	7.0302	9.9326	11.0935	13.7378	6.1273	11.0935	10.126	7.6107	1.161	7.3527	9.3521	7.5462		10.4486	11.287	14.7698	10.5776	12.4479	15.6083	14.3184	12.5769	15.7373	12.2545	16.1888	11.287	12.061
14	12.5769	7.9977	15.2213	14.3184	11.932	14.7699	15.5438	11.9965	14.3183	10.384	16.2533	13.9313	15.1569					9.8036	13.222	10.7711	7.5462	7.8686	12.3189	11.287	13.2219	7.2882	11.3515	10.384	7.8042	2.7734	7.9976	9.3521	8.9006		10.255	12.3834	14.7054	10.9645	11.416	15.5439	14.3184	12.6414	16.9627	12.5124	16.5758	11.4805	10.6421
15	12.19	8.2556	15.6728	12.9639	11.3515	14.7699	14.6409	12.5124	14.3829	11.8675	16.5113	13.6734	15.6728					10.5775	13.8669	11.4805	7.7396	7.9331	12.9639	12.4479	13.4799	4.5793	12.061	9.8036	8.7072	1.1609	10.3196	9.1585	9.9326		10.642	12.7059	14.9633	11.9319	12.6415	15.9308	15.9308	12.7705	17.6722	13.7379	17.9302	11.2225	10.7066
