# Supplementary material for: Pathogenic mutations in the chromokinesin KIF22 disrupt anaphase chromosome segregation
Source: eLife journal article supplement (doi:10.7554/elife.78653), 2022-06-22
Supplement: supp [file F9 FS1 KIF22 Expression T134.xlsx]

## Sheet: Sheet1
Control Knockdown, Untreated
KIF22-GFP	KIF22-GFP T134D	KIF22-GFP T134A
0.922934	0.881932	1.03096
0.950318	1.1476	0.831137
1.0405	1.10886	0.725006
1.10401	0.873276	0.932223
0.843232	1.1918	1.1269
0.898743	1.18778	0.923794
0.767979	0.89076	1.19624
0.997813	0.963798	1.07801
1.28845	1.09103	0.913238
1.16126	0.825903	1.17929
1.02477	0.793938	0.991812
	1.04333	1.07139
1.11972	1.21911	0.9279
0.889208	1.1043	1.06826
1.02296	1.10092	1.00945
0.599948	0.973373	0.936372
1.08241	1.25449	0.950672
1.05222	0.914793	1.04528
1.12398	1.04107	1.17167
1.01058	0.799126	0.788859
0.927662	0.865695	0.910522
1.1713	0.745569	1.02687
	0.972369	1.16414
	1.00919
1.36563	1.20101	1.01248
1.1038	0.924662	1.1037
1.04749	1.15421	0.938164
1.04688	1.02569	0.878833
0.635594	1.15013	1.01395
0.851702	0.91893	0.847773
1.12746	1.22652	0.971379
1.01916	0.991207	0.939524
0.800008	1.03961	1.33236
0.875495	0.809124	1.03348
0.935253	0.841075	0.928361
0.963989	1.0152
1.19742	0.82922
1.03012	0.873415
Control Knockdown, Doxycycline
KIF22-GFP	KIF22-GFP T134D	KIF22-GFP T134A
2.83021	1.45578	2.99613
3.20257	2.93148	1.46318
1.31827	2.21407	2.55012
2.38407	2.20815	1.94084
1.73565	1.74761	2.48719
2.90282	2.62131	1.95125
0.887167	2.57992	2.06674
2.67683	2.16545	1.84542
3.84484	2.36504	2.36421
3.49231	1.19271	2.62694
1.80861	4.05222	1.63301
	2.13186	1.55345
		2.28037
		1.76903
1.48426	1.40738	1.5547
2.10729	2.10554	2.2283
3.1472	1.69575	1.6981
2.34749	2.10032	1.35343
1.68445	2.43757	0.964434
2.524	1.16326	1.42093
3.10851	1.1911	1.18345
2.18879	1.77159	1.60525
1.08888	1.57226	1.75408
1.64528	1.47619	1.65168
1.99173	3.75169	1.11155
2.62883	1.5275	1.79647
1.91405	2.74176	1.54777
1.98409	1.47203	1.25774
2.53839	1.72721
	1.92644
	2.02041
	1.61095
	0.989577
	2.56994
	1.6963
	2.04668
	1.01695
	1.50363
	1.03336
	1.04785
	2.40913
3.47853	1.74219	1.3633
2.80417	1.27726	1.59344
6.22287	3.10886	1.45829
3.61509	1.46351	1.18535
2.1119	1.21203	2.2352
5.26773	1.57565	1.76886
2.89941	1.03162	1.96229
3.05291	1.57214	1.09235
4.97829	2.34067	1.14032
3.42821	1.34213	1.12189
3.94486	1.4621	1.10943
	1.41731	1.43929
	1.22879	1.10995
	1.50568	0.903971
	1.13697	1.61855
	1.38638	1.73894
	1.15211
	1.6134
	1.78679
	1.13059
	2.06782
	1.36281
	1.50003
	2.04304
	2.0127
KIF22 Knockdown, Untreated
KIF22-GFP	KIF22-GFP T134D	KIF22-GFP T134A
0.389487	0.25738	0.352575
0.353481	0.244135	0.309785
0.226755	0.271734	0.33544
0.169643	0.248027	0.328561
0.174889	0.233004	0.260345
0.173734	0.283172	0.283781
0.201156	0.273561	0.297582
0.300134	0.221833	0.397072
0.373457	0.253206	0.248348
0.278404	0.274331	0.279469
0.337627	0.259803	0.202104
0.433164		0.276663
0.213267	0.224445	0.289207
0.220421	0.227296	0.250425
0.191271	0.221922	0.192703
0.191167	0.202709	0.190456
0.216722	0.215917	0.193811
0.218482	0.213175	0.240406
0.24685	0.238194	0.217517
0.191222	0.196928	0.229198
0.22188	0.194642	0.195483
	0.225964	0.204364
	0.256004	0.18521
	0.21755	0.254341
	0.257932	0.263214
	0.23678	0.213598
	0.22787	0.210542
0.236221	0.146589	0.1618
0.300619	0.135908	0.151145
0.295335	0.151124	0.141384
0.315393	0.152129	0.162535
0.390566	0.107677	0.134527
0.295849	0.160879	0.189684
0.31654	0.150129	0.173038
0.348693	0.136242	0.175951
0.32883	0.07674	0.163424
0.441938	0.078157	0.175996
	0.142329	0.170427
	0.122765	0.194528
	0.147279	0.167848
	0.157716	0.156302
	0.161836	0.155358
	0.136423
KIF22 Knockdown, Doxycycline
KIF22-GFP	KIF22-GFP T134D	KIF22-GFP T134A
4.10221	1.88321	2.53733
3.66696	2.61505	1.99893
3.64696	1.3234	1.13136
2.96917	1.04423	2.04074
3.42588	0.873415	1.81087
1.81368	2.2023	2.96856
3.19626	1.4723	2.21367
2.01354	2.97395	1.68207
1.99897	1.75784	2.40523
2.43243	1.77696	4.54188
1.72509		2.50584
2.63775		2.20623
		1.65038
		2.35931
		2.63252
1.47066	2.18154	1.47978
2.26788	3.1444	1.81925
2.0697	2.47759	1.42639
1.08094	3.64284	2.33406
2.17792	2.84035	1.84356
1.51157	1.22138	2.23833
1.27575	1.37196	2.11007
2.05288	2.00912	1.66487
1.65438	1.73816	1.37356
1.22553	2.81169	1.36477
0.88861	1.99496	1.20625
0.951102	2.56594	2.03293
1.38355	2.04411	1.77222
1.89962	2.14988
	1.69266
	1.62679
	0.955048
	1.84653
	1.64794
	1.81189
2.33346	1.24968	1.154
2.24496	1.12576	1.27391
2.52987	1.55715	1.20669
2.00974	1.91224	1.32558
2.1299	1.22636	0.704278
1.58482	1.18442	1.50905
3.67811	0.731072	1.39244
3.02637	1.06505	1.05866
3.11037	1.10677	1.66067
3.16938	0.80605	0.984528
1.49201	0.908746	2.29
1.73887	2.07966	1.08597
	1.8192	0.862241
	0.969404	1.43388
	1.24074	1.54805
	1.4282	1.55118
	1.81658	2.2737
	1.026	1.29119
	0.891645
	1.19914
	1.80238
	1.81253
	1.15005
	1.19984
	1.11765
	1.01672
	2.55696
	1.14325
	1.66705
	2.17879
