# Supplementary material for: Pathogenic mutations in the chromokinesin KIF22 disrupt anaphase chromosome segregation
Source: eLife journal article supplement (doi:10.7554/elife.78653), 2022-06-22
Supplement: supp [file F9 FS2 KIF22 Expression T158.xlsx]

## Sheet: Sheet1
Control Knockdown, Untreated
GFP	KIF22-GFP	KIF22-GFP T158D	KIF22-GFP T158A
0.987338	1.25691	1.0999	0.908131
0.982849	0.806161	1.16909	1.14034
1.01032	1.47967	1.19367	1.05338
1.0332	0.636395	1.05272	0.864879
1.06299	1.08661	0.898626	1.01403
0.776022	0.958026	0.982711	0.95569
1.30256	0.986371	1.09714	0.775215
0.767582	0.996965	1.13203	0.914942
0.858253	0.830788	0.953604	1.00006
1.21889	0.894564	0.94928	1.37334
	1.06754	0.471232
1.0575	0.958411	1.0725	1.14079
0.679952	0.947635	0.991848	0.965882
0.667805	0.908007	1.21789	1.20909
0.761927	0.828746	0.787255	1.16862
1.28885	1.02997	0.860129	0.51562
1.35303	1.54371	1.01592
1.09192	0.783528	0.933345
0.882426		1.12111
1.21659
0.966539	1.09611	0.996429	0.995962
1.09889	1.47114	0.874422	0.978448
1.10955	1.08572	0.975694	0.898471
0.87517	1.11246	0.749547	0.994751
1.23827	1.09155	0.810391	0.946516
1.10607	1.15791	0.848433	0.544561
1.34198	1.02338	1.014	1.20638
0.828092	0.932755	0.967041	0.641526
0.700834	0.819472	1.03846	1.26957
1.11247	0.657798	0.977124	1.11022
0.91486	0.788856	0.937666	0.984
0.630982	0.876705	1.10339	1.30578
1.07628	0.886134	1.18489	1.12382
		1.08978
		1.1407
		1.15552
		0.867958
		1.05131
		1.27609
		1.03818
		0.902967
Control Knockdown, Doxycycline
GFP	KIF22-GFP	KIF22-GFP T158D	KIF22-GFP T158A
0.858631	1.18384	1.93123	1.96679
1.09458	1.9914	0.653355	3.78488
1.05302	4.19617	2.84698	3.79757
1.13472	3.86549	2.38363	5.48218
1.14758	2.83016	2.37538	5.3187
0.933904	1.85798	1.66781	1.46513
1.14589	3.83605	1.5555	3.56744
1.18885	4.17922	1.69509	0.820755
1.00845	2.78488	2.09112	1.7905
	1.89706	1.95524	1.58214
	1.79643	3.60579	4.11176
	3.60175
0.959943	3.41088	3.67825	4.09246
0.994679	1.97703	4.63306	4.11279
0.754884	3.6931	5.48198	14.8883
0.889661	4.75894	3.0774	9.5877
0.984808	2.85578	9.51165
0.867872	5.18532	2.92775
1.0082	3.63184	7.2011
1.13779
0.848751	1.53326	3.12247	2.51738
0.813731	0.680035	2.25134	2.34639
1.26076	1.89584	1.54417	2.65351
1.33258	0.461536	5.55193	2.4642
1.30281	0.432384	1.18586	3.31054
1.07498	1.44116	0.722439	2.67274
1.17029	1.76395	3.90438	1.67651
1.20025	0.57454	3.14461	3.14047
1.09443	1.38854	3.4645	1.6719
1.15285	1.25492	1.63746	3.59714
1.02047	1.8439	1.87834	1.72498
1.24208	1.22682	1.93085	1.83131
	0.501597	1.85822	1.53448
	2.10775	1.93052	2.73604
	1.22772	3.7446	2.54602
		1.93765	0.736514
		1.72326	0.806642
			2.97835
			1.95281
KIF22 Knockdown, Untreated
GFP	KIF22-GFP	KIF22-GFP T158D	KIF22-GFP T158A
0.166125	0.227176	0.174341	0.230219
0.237486	0.154158	0.177047	0.241443
0.205353	0.164413	0.16834	0.205653
0.179084	0.231495	0.179317	0.239081
0.226711	0.265753	0.191582	0.263316
0.220665	0.222936	0.173136	0.621135*
0.192256	0.17063	0.158452	0.1643
0.17434	0.203491	0.191108	0.182429
0.220622	0.217583	0.181711	0.280963
	0.143665	0.203785
		0.182437
0.312754	0.255712	0.187444	0.356088
0.318345	0.35038	0.170015	0.261124
0.272801	0.346087	0.151728	0.350863
0.261431	0.228029	0.153948	0.475667
0.292844	0.207187	0.179924	0.498435
0.302592	0.21655	0.173356
0.15756	0.513847*	0.132179
0.12312	0.24674
	0.192922
	0.201536
	0.236353
0.20329	0.128153	0.144878	0.122134
0.198462	0.134843	0.119851	0.133355
0.192152	0.155269	0.122048	0.136378
0.179655	0.129201	0.138251	0.107284
0.198931	0.098931	0.170817	0.080317
0.149686	0.085002	0.130657	0.123634
0.189734	0.118588	0.114538	0.135784
0.168169	0.141152	0.143051	0.082784
0.167145	0.111782	0.130131	0.114942
0.164971	0.122398	0.110961	0.085592
0.17452	0.101672	0.124308	0.102735
	0.12666	0.102762	0.100125
	0.148526	0.124539	0.097841
	0.092664	0.140395	0.08692
	0.134902	0.105674	0.091552
	0.124007	0.108535	0.09688
		0.165759	0.132693
KIF22 Knockdown, Doxycycline
GFP	KIF22-GFP	KIF22-GFP T158D	KIF22-GFP T158A
0.207056	2.40723	6.88335	1.38448
0.21008	3.9832	3.7109	3.07551
0.253668	1.87255	4.32933	2.20057
0.294158	4.04026	2.47138	2.46841
0.265639	4.36496	1.6362	2.41532
0.239354	1.25457	4.05304	8.69202
0.217572	4.16082	1.15654	3.67305
0.239247	1.6368	0.656151	1.29178
0.261991	2.62014	2.41804	0.19482
0.244913	1.42766	7.99175	2.77147
0.218602	3.64593		2.0973
			1.55569
0.245756	4.87297	4.37709	8.37704
0.226095	3.16741	3.23195	4.04735
0.289044	1.66665	0.391587	0.703267
0.203886	1.84799	2.00513	9.80279
0.229055	1.31354	2.80705	13.4586
0.206261	3.45879	0.824349
0.232287	2.07483	2.81364
0.157236	3.78022	1.99006	1.90351
0.134516	5.09561	1.82767	1.59018
0.147257	0.942357	3.30928	2.13831
0.139447	1.60254	2.46582	1.50494
0.146368	2.24458	1.26275	0.64358
0.145876	1.52578	2.54998	1.98183
0.151905	1.24077	0.901129	1.53441
0.152655	1.72893	4.03326	1.15228
0.144959	1.61793	2.23596	2.37838
0.138216	2.23139	3.26757	2.27493
0.161948	1.71955	4.62362	1.1697
0.166967	1.36722	1.6599	4.17172
0.162454	4.06186	1.45241	2.81593
	3.22819	3.78613	2.17871
	1.60089	4.57164	1.26643
	2.27355	4.32674	1.62204
	2.25715	1.93958	1.27301
		2.89629	1.57325
		1.13581	2.86057
		2.51995	1.7683
		2.55386
