# Supplementary material for: Pathogenic mutations in the chromokinesin KIF22 disrupt anaphase chromosome segregation
Source: eLife journal article supplement (doi:10.7554/elife.78653), 2022-06-22
Supplement: supp [file F9 Nuclear Solidity T158.xlsx]

## Sheet: Sheet1
GFP + Control KD	GFP + KIF22 KD	WT + Control KD	WT + KIF22 KD	T158D + Control KD	T158D + KIF22 KD	T158A + Control KD	T158A + KIF22 KD
0.943	0.959	0.965	0.952	0.943	0.94	0.963	0.954
0.929	0.941	0.975	0.954	0.96	0.941	0.959	0.963
0.967	0.96	0.941	0.951	0.901	0.954	0.972	0.959
0.964	0.937	0.969	0.965	0.967	0.955	0.963	0.97
0.958	0.892	0.978	0.91	0.861	0.888	0.967	0.956
0.968	0.961	0.905	0.962	0.957	0.944	0.965	0.94
0.965	0.933	0.969	0.932	0.948	0.889	0.937	0.955
0.95	0.952	0.974	0.94	0.966	0.959	0.958	0.953
0.967	0.95	0.967	0.95	0.847	0.85	0.964	0.963
0.959	0.956	0.965	0.962	0.958	0.946	0.958	0.932
0.934	0.95	0.961	0.946	0.972	0.968	0.917	0.953
0.95	0.889	0.964	0.953	0.856	0.947	0.973	0.954
0.968	0.965	0.968	0.945	0.901	0.925	0.962	0.959
0.963	0.972	0.969	0.953	0.85	0.952	0.965	0.977
0.949	0.955	0.939	0.963	0.946	0.964	0.959	0.959
0.951	0.892	0.947	0.952	0.948	0.862	0.958	0.953
0.953	0.927	0.929	0.948	0.965	0.964	0.955	0.938
0.942	0.934	0.962	0.952	0.952	0.958	0.97	0.934
0.964	0.969	0.958	0.953	0.957	0.929	0.952	0.937
0.964	0.976	0.955	0.946	0.965	0.828	0.89	0.912
0.965	0.965	0.967	0.944	0.957	0.892	0.96	0.952
0.963	0.962	0.889	0.946	0.956	0.925	0.903	0.949
0.963	0.963	0.975	0.939	0.85	0.97	0.936	0.956
0.968	0.892	0.958	0.968	0.898	0.954	0.956	0.934
0.958	0.956	0.946	0.948	0.72	0.916	0.96	0.965
0.942	0.888	0.964	0.927	0.843	0.916	0.947	0.954
0.967	0.96	0.955	0.951	0.963	0.924	0.866	0.952
0.969	0.969	0.952	0.96	0.937	0.91	0.928	0.968
0.957	0.901	0.899	0.957	0.929	0.9	0.937	0.912
0.957	0.92	0.902	0.896	0.958	0.905	0.968	0.955
0.973	0.977	0.96	0.936	0.962	0.911	0.899	0.936
0.968	0.934	0.957	0.963	0.886	0.973	0.92	0.974
0.956	0.969	0.958	0.941	0.806	0.859	0.947	0.959
0.954	0.971	0.951	0.957	0.844	0.929	0.95	0.969
0.946	0.96	0.953	0.966	0.952	0.951	0.943	0.961
0.952	0.879	0.974	0.959	0.925	0.969	0.968	0.953
0.967	0.948	0.974	0.912	0.88	0.946	0.967	0.962
0.965	0.97	0.94	0.93	0.977	0.96	0.963	0.962
0.94	0.953	0.956	0.957	0.955	0.952	0.972	0.965
0.965	0.969	0.894	0.896	0.948	0.863	0.961	0.958
0.958	0.929	0.938	0.958	0.842	0.925	0.977	0.959
0.956	0.968	0.95	0.936	0.943	0.934	0.966	0.966
0.936	0.966	0.942	0.951	0.852	0.827	0.962	0.97
0.966	0.97	0.964	0.952	0.88	0.935	0.951	0.961
0.957	0.952	0.955	0.966	0.956	0.916	0.972	0.946
0.973	0.971	0.913	0.965	0.938	0.949	0.955	0.95
0.965	0.967	0.975	0.926	0.918	0.879	0.957	0.939
0.973	0.951	0.947	0.962	0.948	0.907	0.958	0.959
0.971	0.959	0.971	0.961	0.926	0.893	0.972	0.942
0.967	0.964	0.943	0.973	0.841	0.943	0.964	0.963
0.968	0.953	0.907	0.968	0.855	0.884	0.957	0.941
0.967	0.969	0.931	0.974	0.719	0.932	0.969	0.969
0.962	0.967	0.957	0.942	0.817	0.945	0.905	0.912
0.957	0.966	0.926	0.943	0.848	0.831	0.968	0.926
0.952	0.933	0.97	0.95	0.969	0.954	0.974	0.966
0.958	0.9	0.976	0.929	0.958	0.949	0.967	0.971
0.937	0.87	0.959	0.909	0.941	0.954	0.957	0.906
0.974	0.958	0.961	0.924	0.88	0.954	0.961	0.932
0.954	0.934	0.975	0.973	0.934	0.811	0.936	0.966
0.956	0.939	0.952	0.928	0.914	0.959	0.947	0.947
0.965	0.958	0.974	0.958	0.811	0.966	0.956	0.963
0.955	0.966	0.967	0.952	0.879	0.938	0.957	0.937
0.971	0.932	0.965	0.933	0.952	0.939	0.961	0.946
0.925	0.97	0.954	0.952	0.889	0.973	0.959	0.947
0.961	0.948	0.974	0.892	0.843	0.936	0.951	0.956
0.974	0.952	0.957	0.96	0.85	0.817	0.969	0.93
0.964	0.955	0.926	0.908	0.944	0.954	0.881	0.949
0.956	0.97	0.948	0.96	0.925	0.963	0.969	0.931
0.97	0.966	0.937	0.928	0.899	0.944	0.928	0.967
0.936	0.958	0.937	0.946	0.954	0.949	0.923	0.933
0.949	0.968	0.939	0.932	0.967	0.959	0.964	0.949
0.968	0.952	0.97	0.949	0.957	0.925	0.955	0.92
0.951	0.965	0.947	0.927	0.949	0.966	0.936	0.957
0.959	0.974	0.966	0.95	0.95	0.957	0.966	0.953
0.911	0.947	0.804	0.929	0.972	0.958	0.955	0.938
0.946	0.946	0.966	0.954	0.957	0.962	0.947	0.957
0.94	0.972	0.949	0.945	0.869	0.973	0.922	0.963
0.969	0.933	0.975	0.95	0.891	0.965	0.945	0.956
0.962	0.97	0.964	0.954	0.966	0.969	0.965	0.952
0.975	0.962	0.959	0.935	0.792	0.899	0.973	0.965
0.945	0.954	0.969	0.917	0.857	0.906	0.968	0.946
0.96	0.955	0.93	0.937	0.87	0.868	0.906	0.95
0.952	0.925	0.947	0.956	0.792	0.939	0.958	0.944
0.971	0.898	0.969	0.942	0.808	0.962	0.954	0.962
0.967	0.948	0.951	0.961	0.927	0.966	0.946	0.949
0.966	0.961	0.936	0.94	0.918	0.921	0.94	0.943
0.95	0.963	0.969	0.965	0.952	0.888	0.945	0.952
0.956	0.978	0.966	0.954	0.932	0.97	0.955	0.931
0.97	0.975	0.946	0.97	0.816	0.951	0.958	0.976
0.968	0.97	0.969	0.961	0.821	0.975	0.899	0.959
0.968	0.971	0.912	0.95	0.944	0.915	0.958	0.968
0.963	0.941	0.973	0.901	0.925	0.963	0.97	0.978
0.953	0.951	0.941	0.966	0.949	0.912	0.942	0.964
0.974	0.927	0.899	0.955	0.906	0.945	0.926	0.949
0.954	0.968	0.974	0.936	0.872	0.89	0.965	0.972
0.972	0.901	0.971	0.939	0.93	0.839	0.964	0.967
0.958	0.893	0.896	0.968	0.914	0.883	0.879	0.947
0.952	0.934	0.975	0.961	0.727	0.967	0.969	0.963
0.959	0.891	0.971	0.973	0.921	0.968	0.966	0.961
0.965	0.963	0.977	0.959	0.962	0.959	0.945	0.96
0.969	0.977	0.934	0.97	0.719	0.907	0.895	0.947
0.972	0.968	0.966	0.959	0.917	0.971	0.958	0.943
0.97	0.936	0.974	0.955	0.832	0.93	0.952	0.962
0.974	0.961	0.952	0.947	0.922	0.945	0.969	0.963
0.915	0.919	0.958	0.946	0.927	0.925	0.909	0.967
0.925	0.952	0.96	0.96	0.965	0.909	0.932	0.975
0.973	0.976	0.918	0.934	0.954	0.972	0.962	0.953
0.968	0.959	0.938	0.95	0.951	0.955	0.943	0.968
0.922	0.967	0.952	0.941	0.959	0.956	0.952	0.973
0.967	0.962	0.964	0.935	0.792	0.951	0.96	0.935
0.971	0.973	0.974	0.928	0.888	0.951	0.918	0.965
0.924	0.953	0.956	0.959	0.965	0.959	0.946	0.969
0.958	0.956	0.951	0.929	0.931	0.928	0.949	0.965
0.97	0.952	0.961	0.965	0.966	0.954	0.937	0.955
0.97	0.94	0.966	0.903	0.884	0.955	0.949	0.938
0.968	0.956	0.975	0.918	0.96	0.959	0.963	0.966
0.966		0.964	0.859	0.954	0.902	0.947	0.969
0.969		0.956	0.963	0.949	0.793	0.95	0.953
0.954		0.963	0.956	0.927	0.969	0.961	0.96
0.945		0.916	0.943	0.961	0.798	0.952	0.96
0.941		0.966	0.925	0.969	0.837	0.945	0.963
0.96		0.969	0.959	0.945	0.952	0.952	0.943
0.909		0.944	0.934	0.963	0.958	0.952	0.96
0.952		0.967	0.926	0.937	0.963	0.952	0.951
0.957		0.951	0.93	0.902	0.964	0.969	0.957
0.916		0.952	0.943	0.956	0.959	0.962	0.971
0.963		0.889	0.961	0.931	0.847	0.941	0.965
0.932		0.954	0.949	0.909	0.954	0.957	0.951
0.852		0.944	0.952	0.936	0.971	0.927	0.963
0.968		0.937	0.957	0.864	0.917	0.943	0.966
0.954		0.97	0.926	0.81	0.955	0.939	0.974
0.953		0.964	0.964	0.949	0.894	0.932	0.962
0.975		0.955	0.956	0.92	0.958	0.94	0.964
0.951		0.941	0.964	0.959	0.841	0.951	0.951
0.962		0.955	0.95	0.929	0.959	0.941	0.945
0.915		0.947	0.959	0.933	0.895	0.927	0.932
0.971		0.932	0.948	0.88	0.959	0.947	0.918
0.969		0.969	0.952	0.948	0.815	0.952	0.97
0.969		0.96	0.945	0.945	0.953	0.951	0.976
0.939		0.969	0.963	0.943	0.968	0.954	0.967
0.967		0.959	0.949	0.915		0.877	0.96
0.97		0.906	0.96	0.953		0.951	0.948
0.947		0.932	0.958	0.752		0.97	0.965
0.89		0.948	0.949	0.851		0.938	0.927
0.973		0.96	0.957	0.938		0.951	0.951
0.972		0.941	0.966	0.928		0.961	0.964
0.973		0.953	0.945	0.912		0.957	0.924
0.955		0.964	0.935	0.963		0.952	0.952
0.97		0.961	0.961	0.942		0.95	0.945
0.938		0.949	0.966	0.935		0.856	0.967
0.954		0.924	0.934	0.803		0.968	0.975
0.954		0.953	0.958	0.953		0.951	0.955
0.969		0.937	0.949	0.907		0.974	0.965
0.961		0.958	0.969	0.74		0.972	0.973
0.953		0.945	0.954	0.943		0.959	0.966
0.957		0.951	0.966	0.751		0.957	0.942
0.964		0.94	0.962	0.974		0.966	0.967
0.945		0.929	0.957	0.96		0.947	0.943
0.941		0.918	0.963	0.931			0.943
0.966		0.968	0.957	0.971			0.935
0.893		0.926	0.963	0.9			0.943
0.97		0.939	0.954	0.938			0.968
0.953		0.952	0.959	0.913			0.964
0.9		0.954	0.957	0.924			0.965
0.969		0.959	0.958	0.896			0.925
0.962		0.94	0.963	0.885			0.959
0.955		0.954	0.964	0.859			0.939
0.958		0.937	0.966	0.839			0.963
0.963		0.961	0.912	0.839			0.938
0.946		0.928	0.949	0.836			0.952
0.958		0.953	0.954	0.889			0.952
0.931		0.932	0.95	0.91			0.964
0.952		0.933	0.948	0.955			0.959
0.963		0.933	0.944	0.963			0.93
0.973		0.936	0.96	0.958			0.953
0.948		0.951	0.954	0.927			0.957
0.957		0.968	0.945	0.924			0.953
0.964		0.96	0.934	0.93			0.947
0.964		0.95	0.956	0.895			0.973
0.942		0.95	0.943	0.882			0.965
0.973		0.971	0.963	0.961			0.961
0.964		0.932	0.957	0.939			0.952
0.945		0.967	0.95	0.96			0.961
0.973		0.916	0.927	0.864			0.948
0.964		0.95	0.935	0.948			0.969
0.955		0.918	0.96	0.924			0.971
0.972		0.948	0.928	0.917			0.941
0.929		0.948	0.928	0.921			0.965
0.956		0.934	0.932	0.934			0.945
0.949		0.883	0.973	0.952			0.956
0.954		0.968	0.967	0.889
0.961		0.962	0.975	0.887
0.947		0.916	0.952	0.94
0.947		0.957	0.946	0.906
0.93		0.939	0.969	0.945
0.973		0.969	0.949	0.931
0.969		0.964	0.975	0.859
0.965		0.956	0.96	0.966
0.938		0.966	0.95	0.921
0.921		0.969	0.957	0.953
0.977		0.963	0.955	0.922
0.972		0.939	0.962	0.947
0.969		0.957	0.958	0.818
0.911		0.954	0.966	0.955
0.941		0.87	0.956	0.931
0.883		0.91	0.94	0.958
0.949		0.947	0.96	0.83
0.938		0.917	0.943	0.958
0.972		0.915	0.964	0.97
0.964		0.951	0.932	0.883
0.915		0.946	0.964	0.912
0.95		0.954	0.974	0.949
0.965		0.967	0.954	0.912
0.937		0.956	0.948	0.949
0.969		0.964	0.957	0.96
0.953		0.951	0.971	0.962
0.946		0.956	0.883	0.943
0.979		0.923	0.922	0.953
0.969		0.978	0.954	0.92
0.977		0.961	0.947	0.934
0.968		0.934	0.917	0.948
0.978		0.97	0.955	0.787
0.936		0.936	0.949	0.961
0.961		0.951	0.95	0.82
0.971		0.96	0.956	0.952
		0.956	0.953	0.796
		0.958	0.959	0.904
		0.936	0.953	0.935
		0.952	0.959	0.846
		0.961	0.949	0.975
		0.965		0.903
		0.957		0.934
		0.974		0.969
		0.954		0.978
		0.967		0.873
		0.963		0.975
		0.958		0.958
		0.914		0.831
		0.957		0.971
		0.946		0.95
		0.973		0.791
		0.918		0.97
		0.931		0.958
		0.964		0.778
		0.929		0.94
		0.937		0.956
		0.935		0.917
		0.959		0.953
		0.966		0.9
		0.971		0.952
		0.949		0.946
		0.973		0.949
		0.929		0.845
		0.953		0.898
		0.968		0.809
		0.96		0.905
		0.955		0.835
		0.944		0.943
		0.947		0.755
		0.971		0.714
		0.957		0.891
		0.952		0.97
		0.937		0.928
		0.953		0.963
		0.959		0.918
		0.926		0.891
		0.929		0.933
		0.925		0.933
		0.942		0.962
				0.964
				0.965
				0.96
				0.96
0.963	0.957	0.936	0.956	0.964	0.952	0.9	0.915
0.958	0.945	0.943	0.941	0.951	0.871	0.951	0.947
0.804	0.954	0.948	0.931	0.977	0.907	0.963	0.962
0.954	0.944	0.876	0.966	0.951	0.957	0.963	0.941
0.959	0.951	0.96	0.956	0.77	0.949	0.962	0.937
0.953	0.968	0.955	0.889	0.965	0.89	0.947	0.945
0.967	0.969	0.943	0.942	0.972	0.952	0.963	0.946
0.914	0.945	0.967	0.952	0.949	0.913	0.943	0.938
0.949	0.963	0.964	0.939	0.955	0.916	0.95	0.94
0.961	0.958	0.893	0.951	0.976	0.935	0.947	0.957
0.954	0.961	0.961	0.965	0.954	0.929	0.945	0.955
0.933	0.934	0.96	0.966	0.976	0.958	0.964	0.958
0.966	0.953	0.951	0.935	0.914	0.897	0.977	0.954
0.948	0.966	0.89	0.953	0.932	0.925	0.965	0.964
0.968	0.959	0.886	0.954	0.959	0.972	0.953	0.952
0.973	0.967	0.936	0.944	0.843	0.96	0.934	0.947
0.923	0.96	0.955	0.967	0.976	0.961	0.965	0.965
0.974	0.955	0.967	0.929	0.962	0.966	0.978	0.954
0.945	0.969	0.944	0.945	0.964	0.958	0.927	0.874
0.973	0.958	0.942	0.939	0.961	0.934	0.942	0.94
0.966	0.932	0.965	0.957	0.782	0.973	0.971	0.922
0.952	0.968	0.926	0.958	0.958	0.966	0.964	0.95
0.952	0.968	0.94	0.942	0.812	0.824	0.935	0.933
0.969	0.968	0.936	0.965	0.968	0.959	0.955	0.956
0.965	0.965	0.95	0.946	0.928	0.958	0.964	0.952
0.973	0.959	0.952	0.959	0.971	0.884	0.963	0.953
0.971	0.963	0.959	0.947	0.879	0.892	0.958	0.951
0.968	0.968	0.918	0.937	0.933	0.965	0.958	0.964
0.95	0.952	0.969	0.955	0.956	0.958	0.929	0.949
0.96	0.951	0.954	0.962	0.971	0.808	0.969	0.936
0.95	0.971	0.928	0.94	0.948	0.965	0.951	0.951
0.979	0.964	0.962	0.959	0.923	0.93	0.958	0.936
0.972	0.96	0.966	0.951	0.796	0.948	0.955	0.939
0.952	0.973	0.948	0.962	0.971	0.953	0.924	0.956
0.97	0.969	0.921	0.958	0.943	0.959	0.951	0.931
0.95	0.96	0.966	0.971	0.894	0.968	0.964	0.956
0.973	0.972	0.923	0.95	0.975	0.943	0.973	0.957
0.96	0.951	0.966	0.96	0.83	0.951	0.939	0.957
0.964	0.972	0.948	0.968	0.835	0.956	0.956	0.953
0.958	0.968	0.964	0.951	0.964	0.916	0.959	0.942
0.957	0.924	0.956	0.969	0.903	0.936	0.927	0.926
0.969	0.967	0.956	0.96	0.933	0.811	0.94	0.941
0.952	0.966	0.928	0.97	0.975	0.944	0.951	0.94
0.969	0.966	0.88	0.961	0.927	0.913	0.97	0.95
0.964	0.961	0.917	0.961	0.975	0.967	0.874	0.94
0.964	0.978	0.9	0.973	0.923	0.958	0.947	0.944
0.963	0.974	0.944	0.909	0.926	0.966	0.95	0.943
0.97	0.978	0.964	0.916	0.977	0.916	0.952	0.954
0.953	0.975	0.963	0.943	0.959	0.949	0.922	0.934
0.954	0.974	0.961	0.953	0.955	0.968	0.953	0.964
0.956	0.974	0.955	0.954	0.924	0.971	0.962	0.951
0.943	0.943	0.934	0.946	0.954	0.976	0.969	0.961
0.962	0.972	0.86	0.949	0.95	0.968	0.964	0.954
0.944	0.976	0.931	0.964	0.916	0.89	0.968	0.95
0.962	0.95	0.969	0.966	0.933	0.907	0.967	0.954
0.955	0.954	0.956	0.96	0.963	0.951	0.971	0.964
0.94	0.976	0.93	0.966	0.87	0.963	0.933	0.96
0.956	0.93	0.94	0.952	0.975	0.935	0.976	0.949
0.957	0.963	0.945	0.973	0.962	0.957	0.955	0.949
0.965	0.963	0.939	0.96	0.952	0.953	0.9	0.934
0.96	0.964	0.973	0.928	0.873	0.888	0.883	0.96
0.959	0.972	0.961	0.953	0.878	0.928	0.968	0.95
0.956	0.944	0.977	0.949	0.899	0.91	0.938	0.952
0.966	0.953	0.972	0.92	0.95	0.923	0.948	0.954
0.965	0.957	0.964	0.946	0.931	0.885	0.959	0.957
0.922	0.943	0.977	0.953	0.807	0.959	0.956	0.967
0.949	0.957	0.947	0.973	0.962	0.944	0.96	0.954
0.961	0.966	0.84	0.951	0.87	0.934	0.949	0.956
0.97	0.978	0.965	0.96	0.955	0.952	0.939	0.969
0.959	0.941	0.968	0.943	0.888	0.927	0.941	0.913
0.974	0.975	0.975	0.937	0.946	0.924	0.902	0.961
0.933	0.927	0.927	0.93	0.967	0.964	0.962	0.942
0.969	0.956	0.973	0.96	0.889	0.84	0.917	0.963
0.972	0.962	0.969	0.949	0.914	0.94	0.953	0.964
0.959	0.978	0.975	0.927	0.923	0.809	0.961	0.951
0.943	0.86	0.973	0.928	0.937	0.957	0.952	0.954
0.955	0.916	0.972	0.92	0.871	0.968	0.921	0.959
0.975	0.967	0.941	0.924	0.927	0.94	0.964	0.948
0.969	0.921	0.949	0.925	0.917	0.955	0.892	0.954
0.967	0.966	0.979	0.956	0.877	0.934	0.964	0.912
0.928	0.958	0.971	0.869	0.973	0.945	0.961	0.939
0.973	0.954	0.958	0.967	0.962	0.902	0.914	0.955
0.929	0.942	0.972	0.941	0.964	0.957	0.928	0.948
0.933	0.963	0.971	0.953	0.973	0.961	0.929	0.949
0.972	0.948	0.968	0.972	0.953	0.96	0.96	0.962
0.946	0.941	0.943	0.975	0.939	0.948	0.942	0.96
0.837	0.964	0.955	0.922	0.958	0.924	0.956	0.958
0.962	0.956	0.942	0.965	0.88	0.963	0.96	0.938
0.955	0.94	0.939	0.949	0.942	0.955	0.936	0.953
0.946	0.972	0.87	0.97	0.859	0.949	0.973	0.935
0.906	0.958	0.951	0.939	0.891	0.961	0.964	0.934
0.955	0.974	0.944	0.957	0.922	0.964	0.978	0.96
0.96	0.918	0.944	0.918	0.96	0.945	0.97	0.948
0.946	0.958	0.971	0.971	0.958	0.948	0.976	0.952
0.946	0.961	0.943	0.957	0.943	0.961	0.949	0.943
0.963	0.96	0.975	0.915	0.97	0.935	0.963	0.937
0.975	0.943	0.961	0.97	0.881	0.973	0.973	0.937
0.948	0.95	0.948	0.949	0.969	0.916	0.96	0.965
0.967	0.953	0.967	0.964	0.947	0.952	0.966	0.953
0.946	0.928	0.95	0.951	0.942	0.963	0.958	0.949
0.965	0.958	0.954	0.934	0.963	0.935	0.939	0.964
0.952	0.952	0.962	0.932	0.924	0.958	0.969	0.955
0.959	0.973	0.957	0.943	0.951	0.95	0.939	0.953
0.949	0.962	0.966	0.965	0.957	0.883	0.972	0.966
0.973	0.975	0.961	0.965	0.954	0.925	0.973	0.946
0.977	0.967	0.967	0.951	0.888	0.949	0.944	0.96
0.95	0.972	0.937	0.968	0.936	0.959	0.953	0.948
0.979	0.972	0.966	0.938	0.965	0.908	0.921
0.973	0.935	0.967	0.956	0.936	0.933	0.965
0.911	0.964	0.968	0.97	0.955	0.931	0.963
0.967	0.966	0.951	0.97	0.973	0.899	0.971
0.968	0.971	0.966	0.958	0.919	0.918	0.975
0.963	0.971	0.956	0.942	0.96	0.957	0.956
0.954	0.975	0.967	0.932	0.906	0.897	0.949
0.898	0.974	0.963	0.952	0.941	0.95	0.959
0.817	0.969	0.883	0.949	0.947	0.881	0.964
0.9	0.967	0.969	0.953	0.952	0.932	0.958
0.942	0.963	0.94	0.914	0.946	0.935	0.96
0.922	0.972	0.942	0.973	0.862	0.945	0.966
0.898	0.974	0.945	0.931	0.967	0.846	0.935
0.942	0.971	0.921	0.96	0.952	0.949	0.944
0.933	0.959	0.843	0.959	0.889	0.963	0.913
0.961	0.961	0.951	0.961	0.934	0.826	0.969
0.966	0.956	0.969	0.951	0.92	0.82	0.953
0.973	0.972	0.889	0.909	0.928	0.944	0.951
0.974	0.957	0.871	0.972	0.962	0.886	0.936
0.976	0.971	0.941	0.973	0.949	0.894	0.957
0.972	0.948	0.966	0.923	0.959	0.971	0.962
0.957	0.953	0.962	0.961	0.904	0.922	0.907
0.968	0.968	0.962	0.951	0.95	0.941	0.969
0.954	0.968		0.946	0.952	0.966	0.972
0.965	0.968		0.912	0.956	0.963	0.946
0.953	0.971		0.95	0.873	0.894	0.944
0.974	0.978		0.904	0.912	0.944	0.959
0.951	0.973		0.913	0.959	0.902	0.911
0.942	0.951		0.968	0.928	0.937	0.936
0.959	0.969		0.964	0.915	0.91	0.947
0.959	0.969		0.932	0.931	0.873	0.952
0.888	0.957		0.928	0.95	0.962	0.961
0.964	0.964		0.945	0.882	0.945	0.941
0.969	0.981		0.946	0.911	0.886	0.936
0.949	0.97		0.91	0.895	0.881	0.959
0.96	0.943		0.956	0.951	0.921	0.948
0.973	0.976		0.944	0.802	0.908	0.952
0.946	0.942		0.946	0.95	0.904	0.906
0.978	0.971		0.958	0.965	0.913	0.948
0.947	0.969		0.945	0.849	0.873	0.958
0.956	0.96		0.961	0.964	0.96	0.943
0.959	0.952		0.958	0.918	0.935	0.952
0.947	0.954		0.966	0.948	0.952	0.965
0.944	0.941		0.919	0.952	0.925	0.93
0.978	0.956		0.954	0.962	0.887	0.921
0.974	0.947		0.969	0.941	0.936	0.944
0.946	0.955		0.974	0.939	0.951	0.801
0.954	0.922		0.958	0.939	0.95	0.875
0.932	0.966		0.971	0.969	0.941	0.96
0.962	0.959		0.969	0.946	0.804	0.898
0.973	0.967		0.966	0.771	0.943	0.92
0.958	0.928		0.974	0.953	0.881	0.907
0.945	0.962		0.974	0.845	0.889
0.962	0.972		0.961	0.763	0.814
0.947	0.959		0.962	0.928	0.877
0.97	0.968		0.971	0.955	0.921
0.954	0.963		0.958	0.872	0.951
0.94			0.957	0.864	0.943
0.965			0.962	0.97	0.929
			0.954	0.864	0.949
			0.968	0.919	0.956
			0.965	0.735
			0.961	0.936
			0.956	0.86
			0.964	0.81
			0.938	0.886
			0.977	0.895
			0.928	0.694
			0.933	0.822
			0.962	0.954
			0.959	0.938
			0.944
			0.944
			0.968
			0.921
			0.954
			0.959
			0.95
			0.969
			0.915
			0.936
			0.935
0.945	0.968	0.946	0.95	0.951	0.955	0.941	0.953
0.954	0.976	0.956	0.918	0.972	0.906	0.965	0.972
0.951	0.974	0.916	0.941	0.934	0.942	0.962	0.956
0.936	0.971	0.963	0.921	0.955	0.948	0.968	0.958
0.956	0.974	0.924	0.964	0.797	0.929	0.952	0.955
0.972	0.975	0.962	0.955	0.972	0.959	0.954	0.962
0.946	0.978	0.935	0.933	0.938	0.973	0.947	0.972
0.937	0.961	0.951	0.928	0.977	0.968	0.948	0.963
0.962	0.963	0.938	0.951	0.945	0.917	0.963	0.968
0.953	0.97	0.915	0.935	0.964	0.947	0.965	0.969
0.956	0.966	0.951	0.943	0.924	0.958	0.952	0.958
0.971	0.963	0.961	0.95	0.974	0.839	0.967	0.967
0.961	0.967	0.958	0.945	0.88	0.954	0.941	0.943
0.971	0.956	0.961	0.948	0.967	0.925	0.97	0.952
0.969	0.953	0.962	0.957	0.934	0.859	0.97	0.941
0.912	0.962	0.969	0.956	0.925	0.96	0.911	0.96
0.966	0.966	0.964	0.936	0.815	0.956	0.971	0.938
0.964	0.973	0.964	0.951	0.956	0.954	0.937	0.942
0.956	0.946	0.928	0.946	0.97	0.958	0.973	0.939
0.951	0.977	0.953	0.886	0.926	0.911	0.895	0.94
0.948	0.975	0.959	0.941	0.952	0.954	0.956	0.94
0.949	0.973	0.965	0.957	0.961	0.941	0.963	0.832
0.974	0.973	0.969	0.969	0.892	0.794	0.958	0.917
0.969	0.951	0.942	0.936	0.959	0.958	0.971	0.964
0.954	0.944	0.97	0.967	0.937	0.951	0.966	0.927
0.966	0.956	0.977	0.953	0.912	0.968	0.902	0.962
0.96	0.967	0.948	0.943	0.949	0.959	0.937	0.971
0.964	0.95	0.931	0.972	0.951	0.946	0.958	0.97
0.95	0.949	0.957	0.963	0.957	0.957	0.967	0.969
0.976	0.976	0.963	0.974	0.694	0.929	0.948	0.924
0.972	0.914	0.948	0.918	0.906	0.926	0.961	0.953
0.956	0.974	0.947	0.937	0.968	0.933	0.95	0.947
0.961	0.973	0.951	0.953	0.908	0.939	0.944	0.92
0.968	0.939	0.927	0.971	0.776	0.964	0.934	0.96
0.964	0.966	0.947	0.942	0.883	0.971	0.944	0.954
0.955	0.954	0.952	0.956	0.787	0.885	0.953	0.944
0.952	0.966	0.945	0.95	0.875	0.96	0.896	0.805
0.953	0.941	0.937	0.967	0.952	0.884	0.956	0.976
0.943	0.967	0.951	0.972	0.836	0.964	0.959	0.959
0.942	0.97	0.948	0.958	0.968	0.953	0.949	0.973
0.96	0.963	0.955	0.965	0.889	0.874	0.944	0.968
0.967	0.925	0.961	0.964	0.939	0.977	0.956	0.962
0.976	0.952	0.878	0.96	0.864	0.943	0.922	0.949
0.977	0.96	0.915	0.96	0.895	0.94	0.969	0.952
0.948	0.943	0.95	0.964	0.951	0.894	0.949	0.969
0.975	0.937	0.946	0.948	0.942	0.969	0.965	0.975
0.959	0.961	0.913	0.96	0.955	0.904	0.967	0.95
0.959	0.955	0.969	0.953	0.941	0.792	0.963	0.938
0.955	0.97	0.961	0.959	0.906	0.962	0.88	0.967
0.96	0.948	0.948	0.857	0.964	0.963	0.949	0.948
0.96	0.968	0.974	0.959	0.961	0.808	0.934	0.933
0.959	0.972	0.94	0.947	0.927	0.958	0.966	0.964
0.978	0.974	0.952	0.956	0.941	0.947	0.948	0.934
0.968	0.97	0.964	0.928	0.931	0.893	0.944	0.955
0.961	0.962	0.967	0.963	0.962	0.921	0.971	0.935
0.968	0.943	0.921	0.949	0.974	0.919	0.971	0.968
0.956	0.962	0.929	0.929	0.876	0.889	0.938	0.947
0.971	0.958	0.951	0.941	0.893	0.962	0.943	0.955
0.924	0.964	0.941	0.952	0.867	0.933	0.957	0.961
0.971	0.938	0.955	0.914	0.929	0.89	0.961	0.964
0.967	0.962	0.938	0.944	0.919	0.865	0.953	0.954
0.971	0.973	0.96	0.955	0.913	0.938	0.964	0.936
0.967	0.963	0.966	0.953	0.969	0.976	0.924	0.962
0.971	0.969	0.918	0.956	0.966	0.907	0.96	0.955
0.969	0.979	0.935	0.951	0.963	0.856	0.953	0.96
0.968	0.962	0.946	0.903	0.92	0.88	0.961	0.922
0.971	0.958	0.959	0.943	0.968	0.847	0.96	0.948
0.969	0.971	0.972	0.946	0.932	0.851	0.928	0.933
0.956	0.978	0.946	0.955	0.915	0.961	0.935	0.94
0.956	0.954	0.959	0.969	0.822	0.901	0.931	0.959
0.975	0.958	0.97	0.956	0.965	0.969	0.944	0.953
0.943	0.965	0.971	0.936	0.941	0.951	0.924	0.935
0.966	0.949	0.961	0.95	0.963	0.864	0.939	0.961
0.975	0.967	0.969	0.93	0.949	0.965	0.933	0.951
0.963	0.957	0.962	0.964	0.922	0.93	0.95	0.951
0.961	0.959	0.968	0.955	0.969	0.959	0.973	0.909
0.959	0.974	0.956	0.964	0.936	0.901	0.965	0.958
0.958	0.967	0.963	0.967	0.936	0.931	0.956	0.954
0.946	0.919	0.969	0.967	0.836	0.964	0.956	0.926
0.97	0.963	0.969	0.937	0.955	0.923	0.94	0.951
0.946	0.955	0.95	0.948	0.971	0.956	0.956	0.955
0.946	0.972	0.969	0.977	0.946	0.921	0.969	0.971
0.94	0.928	0.96	0.956	0.959	0.84	0.954	0.963
0.902	0.963	0.963	0.964	0.965	0.842	0.966	0.961
0.951	0.967	0.973	0.974	0.674	0.968	0.976	0.954
0.971	0.969	0.949	0.971	0.914	0.882	0.955	0.951
0.944	0.957	0.964	0.96	0.969	0.962	0.945	0.938
0.961	0.952	0.97	0.951	0.795	0.954	0.968	0.95
0.968	0.963	0.965	0.964	0.935	0.962	0.953	0.956
0.961	0.969	0.942	0.952	0.913	0.951	0.957	0.953
0.964	0.959	0.939	0.962	0.822	0.953	0.965	0.969
0.963	0.975	0.946	0.942	0.86	0.956	0.968	0.937
0.891	0.966	0.974	0.958	0.973	0.979	0.959	0.937
0.969	0.951	0.957	0.968	0.884	0.921	0.939	0.955
0.973	0.966	0.959	0.964	0.951	0.95	0.944	0.97
0.96	0.919	0.972	0.934	0.949	0.861	0.957	0.962
0.955	0.955	0.973	0.974	0.965	0.854	0.917	0.972
0.963	0.969	0.96	0.961	0.898	0.851	0.914	0.94
0.968	0.957	0.967	0.948	0.958	0.954	0.969	0.961
0.959	0.938	0.912	0.966	0.931	0.969	0.927	0.938
0.974	0.96	0.963	0.938	0.943	0.885	0.929	0.963
0.965	0.975	0.962	0.969	0.895	0.941	0.905	0.927
0.974	0.957	0.974	0.958	0.94	0.903	0.941	0.958
0.965	0.968	0.966	0.907	0.932	0.961	0.961	0.944
0.965	0.943	0.963	0.933	0.922	0.947	0.959	0.962
0.957	0.924	0.964	0.968	0.916	0.964	0.966	0.973
0.96	0.959	0.959	0.965	0.959	0.969	0.972	0.969
0.955	0.966	0.971	0.967	0.758	0.964	0.906	0.963
0.968	0.945	0.965	0.955	0.842	0.956	0.949	0.968
0.968	0.972	0.953	0.967	0.944	0.957	0.942	0.963
0.976	0.96	0.945	0.958	0.964	0.836	0.953	0.96
0.971	0.962	0.946	0.968	0.947	0.975	0.943	0.929
0.964	0.965	0.953	0.949	0.811	0.898	0.908	0.96
0.973	0.939	0.948	0.958	0.876	0.87	0.898	0.972
0.963	0.968	0.95	0.968	0.934	0.961	0.955	0.958
0.953	0.936	0.961	0.958	0.942	0.963	0.953	0.967
0.956	0.969	0.958	0.963	0.965	0.975	0.974	0.931
0.947	0.972	0.968	0.95	0.934	0.762	0.968	0.934
0.961	0.956	0.961	0.936	0.965	0.797	0.958	0.95
0.966	0.971	0.968	0.959	0.882	0.967	0.971	0.965
0.961	0.962	0.952	0.968	0.946	0.964	0.962	0.93
0.953	0.882	0.917	0.955	0.964	0.961	0.964	0.859
0.961	0.975	0.949	0.948	0.867	0.969	0.945	0.914
	0.964	0.932	0.921	0.964	0.901	0.95	0.954
	0.953	0.967	0.947	0.968		0.944	0.963
	0.966	0.973	0.958	0.963		0.968	0.961
	0.883	0.947	0.952	0.927		0.968	0.969
	0.935	0.948	0.936	0.831		0.964	0.932
	0.971	0.948	0.968	0.931		0.971	0.96
	0.963	0.96	0.96	0.934		0.925	0.956
	0.945	0.952	0.972	0.938		0.957
	0.981	0.953	0.963	0.962		0.96
	0.938	0.916	0.948	0.96		0.922
	0.935	0.95	0.965	0.908		0.972
	0.964	0.95	0.971	0.973		0.881
	0.97	0.966	0.969	0.973		0.965
	0.951	0.965	0.96	0.888		0.967
	0.97	0.961	0.958	0.966		0.914
		0.95	0.965	0.967		0.964
		0.973	0.949	0.96		0.919
		0.961	0.958	0.926		0.899
		0.934	0.967	0.948		0.937
		0.956	0.963	0.972		0.97
		0.965	0.945	0.923		0.966
		0.951	0.96	0.922		0.946
		0.958	0.908	0.944		0.977
		0.968	0.936	0.937		0.975
		0.953	0.961	0.782		0.975
		0.958	0.948	0.909		0.97
		0.927	0.96	0.815		0.965
		0.912	0.965	0.957		0.962
		0.969	0.968	0.966		0.969
		0.96	0.959	0.943		0.961
		0.886	0.947	0.866		0.955
		0.943	0.943	0.958		0.97
		0.947	0.976	0.884		0.968
		0.942	0.952	0.942		0.965
		0.966	0.956	0.812		0.972
		0.961	0.962	0.938		0.937
		0.95	0.963	0.88		0.949
		0.92	0.955	0.934
		0.964	0.973	0.971
		0.946	0.965	0.969
		0.964	0.965	0.905
		0.901	0.971	0.949
		0.961		0.969
		0.937		0.974
		0.967		0.938
		0.926		0.956
		0.952		0.972
		0.962		0.943
		0.96		0.954
		0.973		0.968
		0.941		0.846
		0.978		0.908
		0.969		0.872
		0.97		0.942
		0.946		0.975
		0.939		0.892
		0.97		0.957
		0.959		0.953
		0.96		0.949
		0.944		0.95
		0.972		0.837
		0.965		0.934
		0.969		0.944
		0.941		0.949
		0.962		0.922
		0.95		0.902
		0.883		0.752
		0.964		0.913
		0.949		0.965
		0.939		0.957
		0.956
		0.917
		0.966
		0.963
		0.953
		0.944
		0.974
		0.956
		0.957
		0.916
		0.964
		0.973
		0.927
		0.962
		0.951
		0.931
		0.962
		0.965
		0.974
		0.953
		0.939
